# Supplementary material for: A Contouring Strategy and Reference Atlases for the Full Abdominopelvic Bowel Bag on Treatment Planning and Cone Beam Computed Tomography Images
Source: PubMed Central journal article supplement — Adv Radiat Oncol. 2022 Jul 23;7(6):101031. doi: 10.1016/j.adro.2022.101031 (PMC9450071; doi:10.1016/j.adro.2022.101031), 2022-07-23

# Supplemental Atlas

Contouring guidelines for the full abdominopelvic  
bowel bag on treatment planning and cone beam  
computed tomography images

# Legend and acronyms used in the atlas

Top left slice: a slice in the treatment planning CT images with bowel bag contour.

Top right slice: same slice in the treatment planning CT images without bowel bag contour.

Bottom left slice: same slice in the cone beam CT images with bowel bag contour.

Bottom right slice: same slice in the cone beam CT images without bowel bag contour.

Yellow lines: slices included in the atlas.

MM-px: Main Male atlas, page x.

UA-px: Upper Abdominal atlas, page x.

PF-px: Pelvic Female atlas, page x.

Cx: coronal slice with slice index x.

Sx: Sagittal slice with slice index x.

T(y)=+/-x: axial slice that is x cm from the reference CT slice (CT0). +x: superior of CT0. -x: inferior of CT0.

OD#x: Operational Definition #x, as defined in table 2 in the paper.

White dashed rectangle: location of the contour segment where an OD is applied.

White solid arrow: points to the contour segment that uses the specific OD references at the bottom of that page.

Main Male

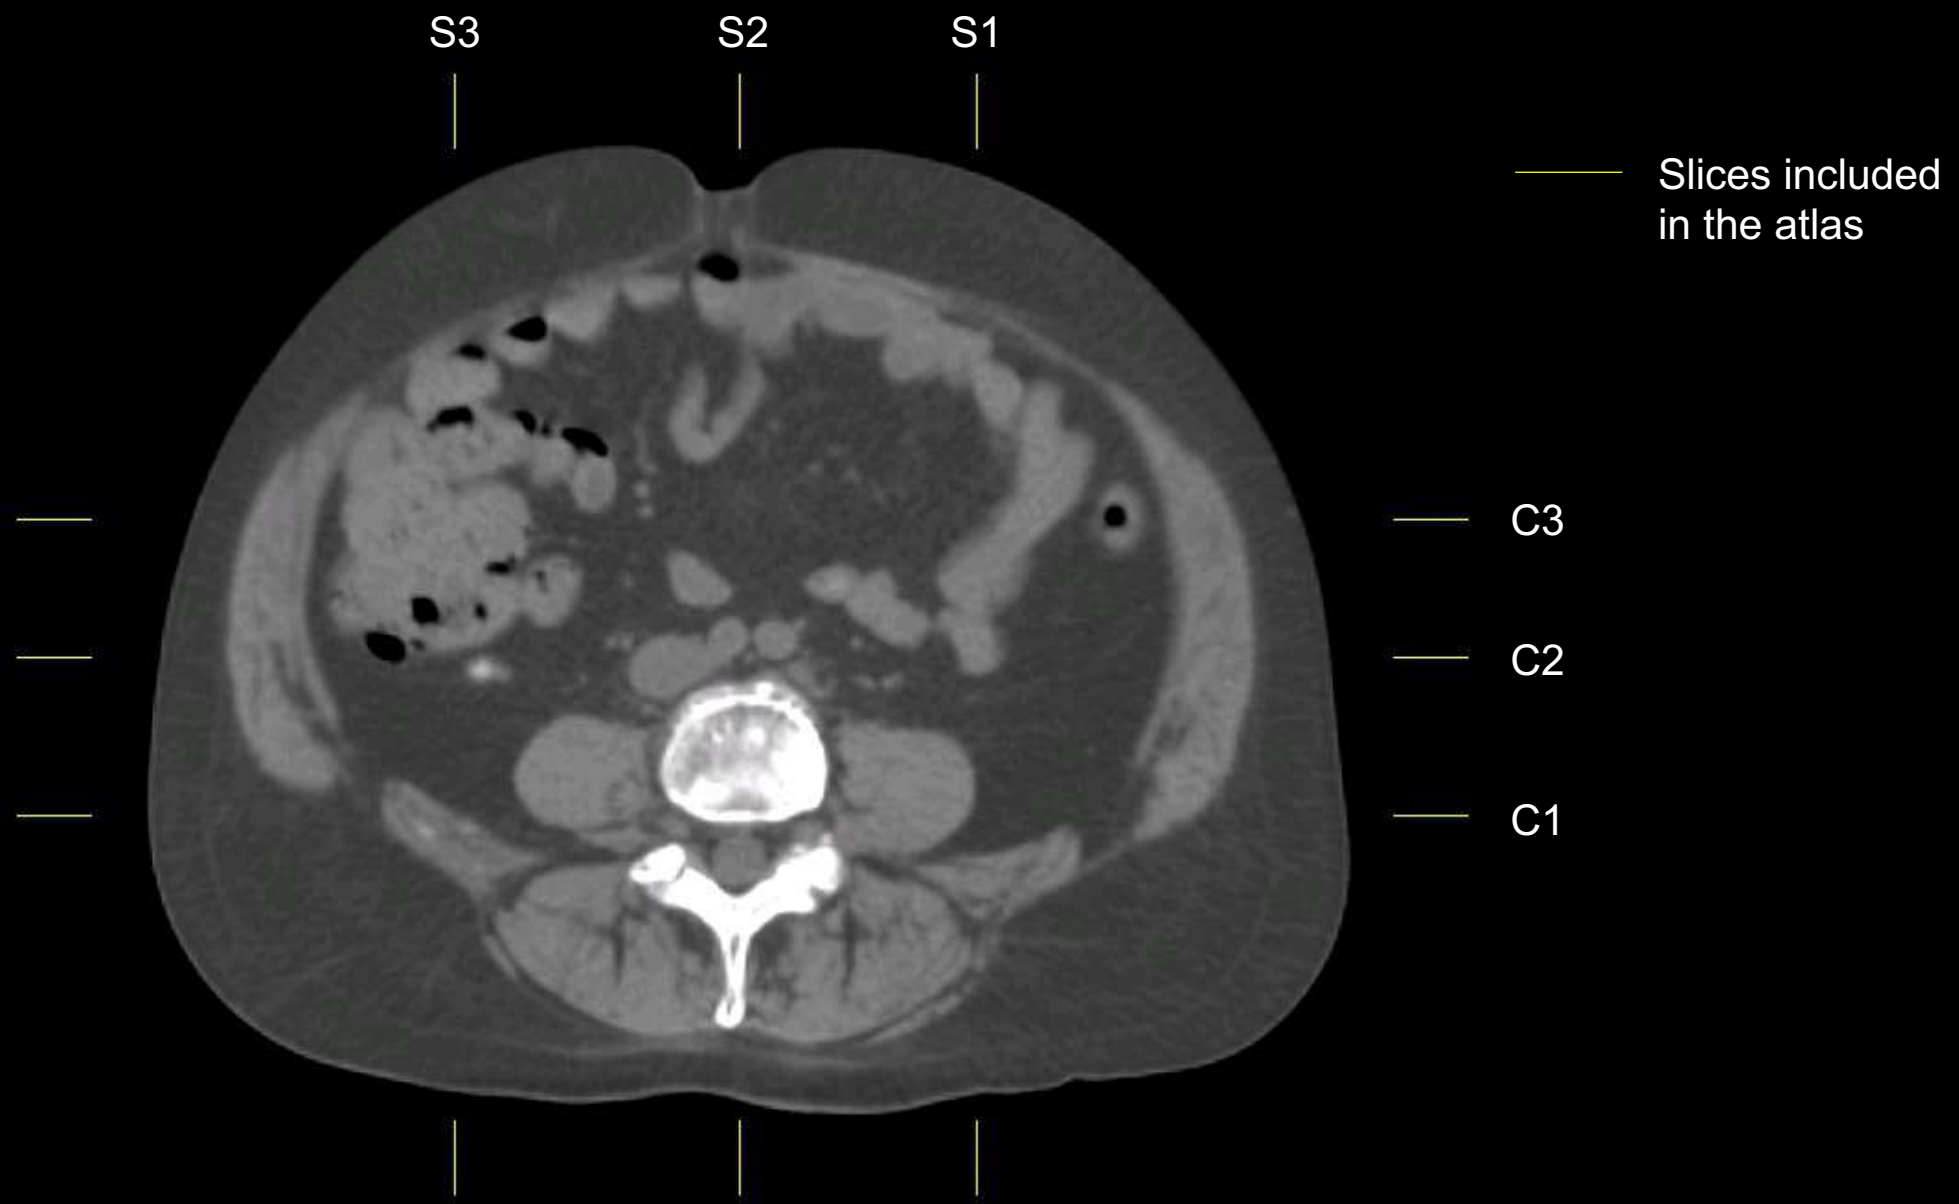

C1 C2 C3

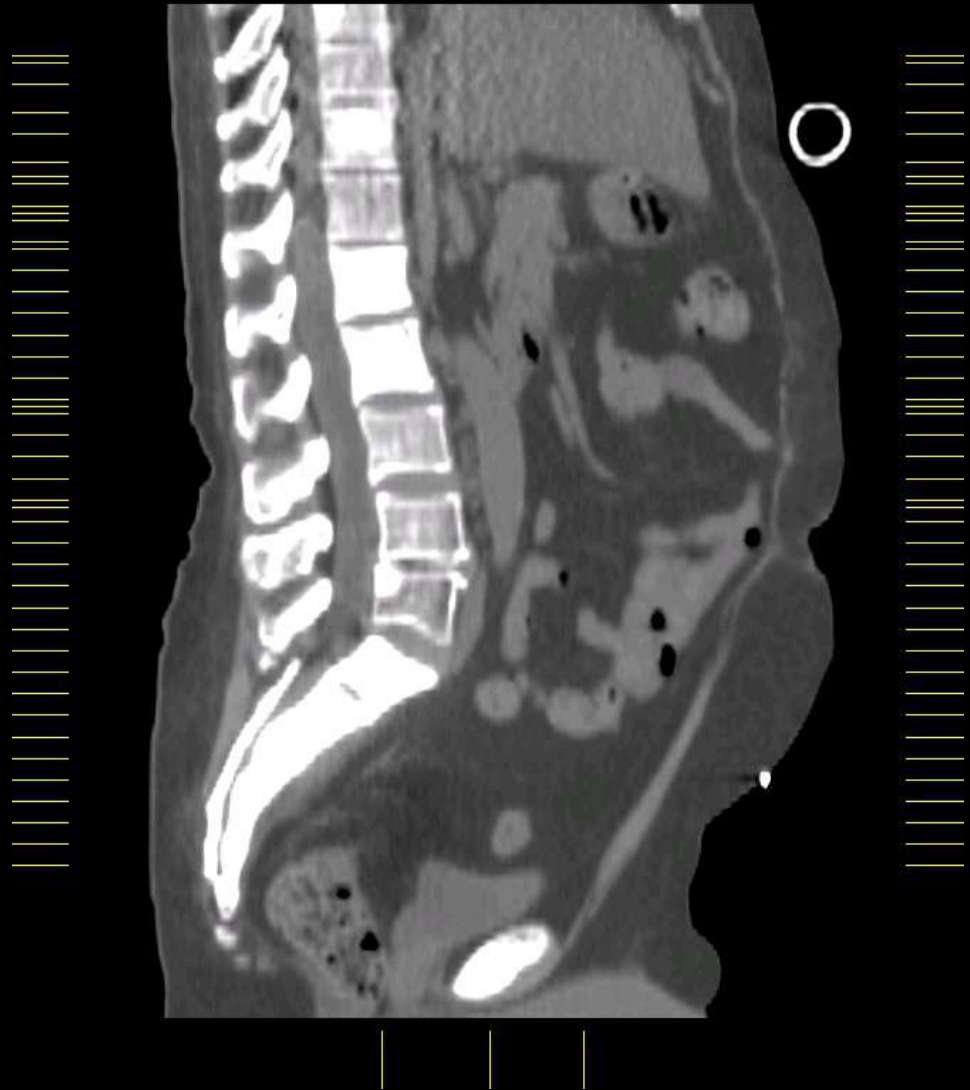

— Slices included in the atlas

S3

S2

S1

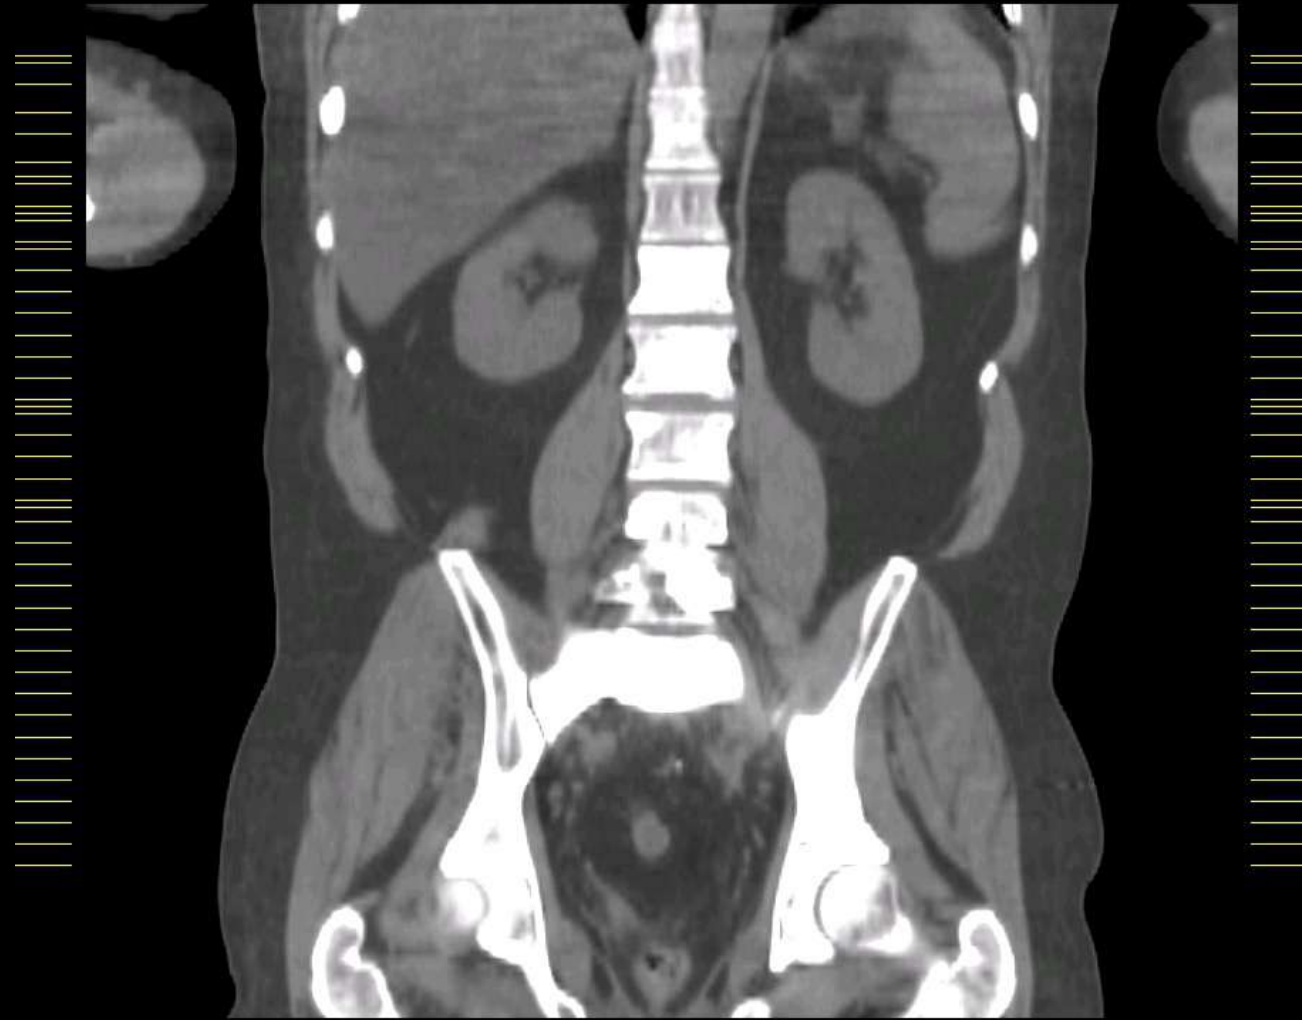

— Slices included  
in the atlas

C1

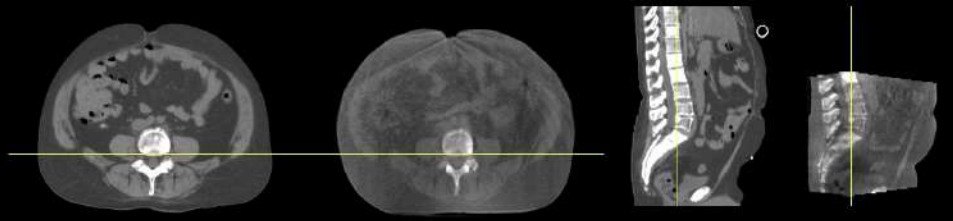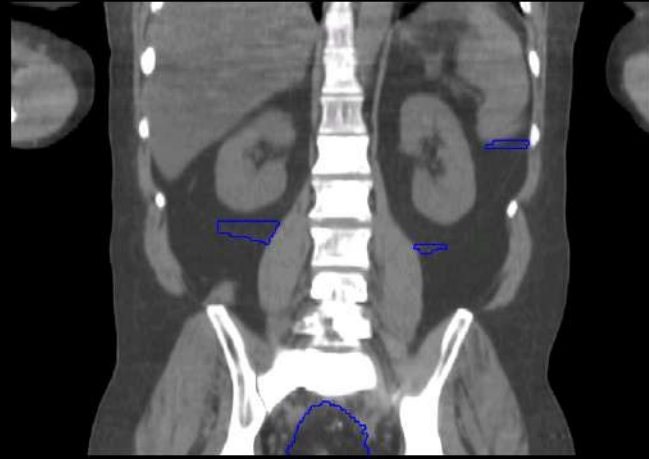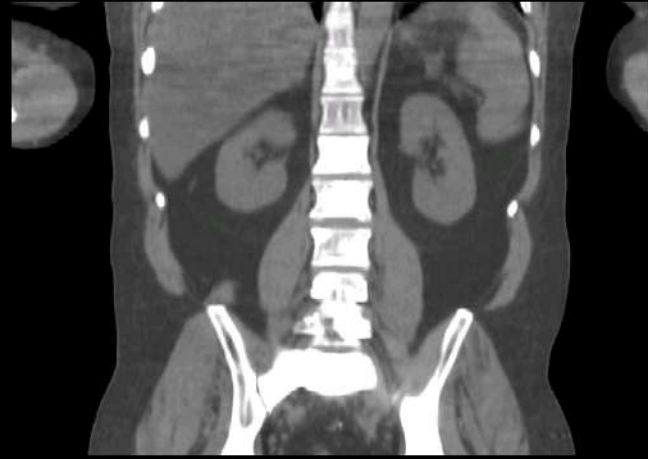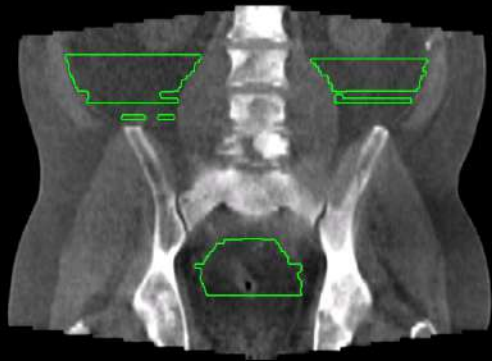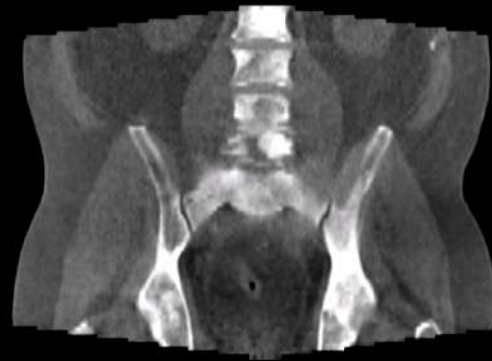

C2

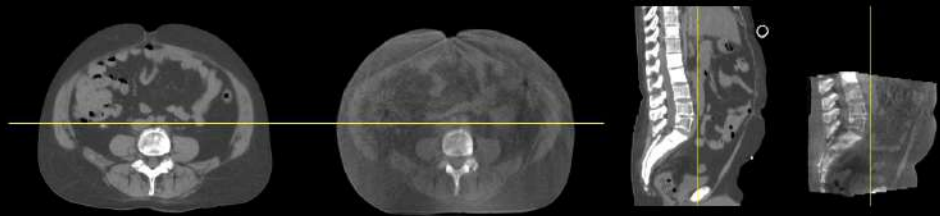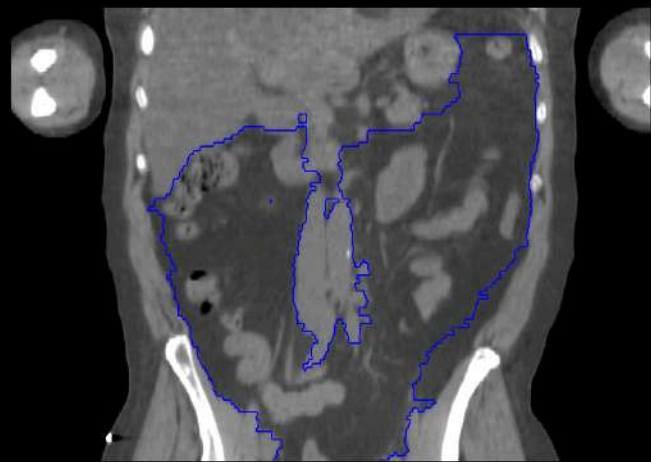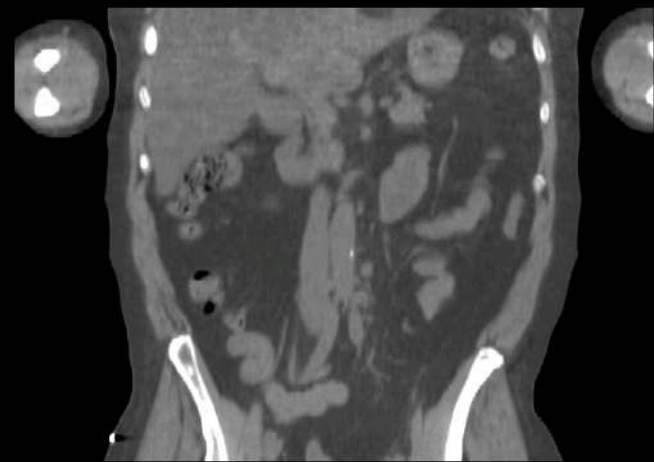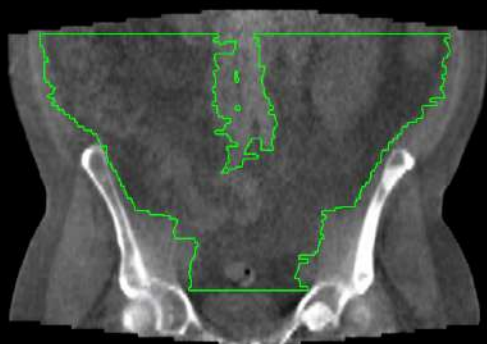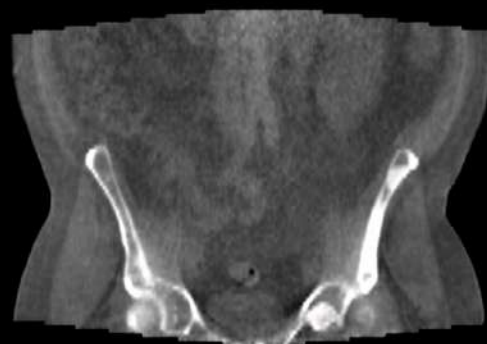



C3

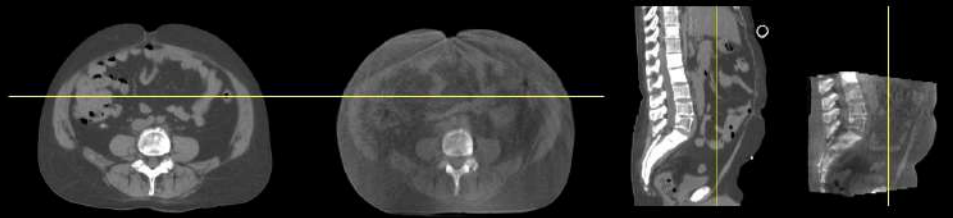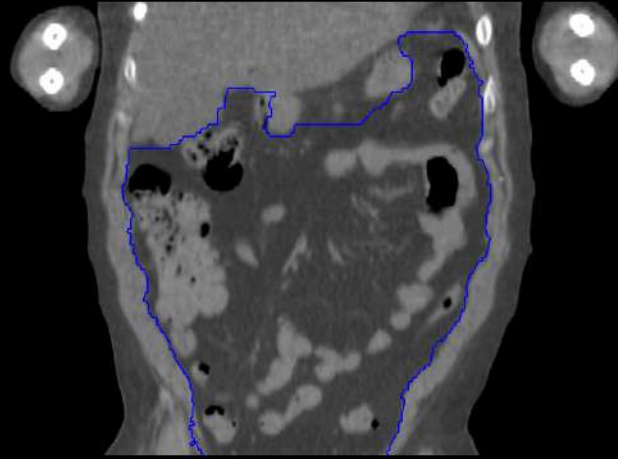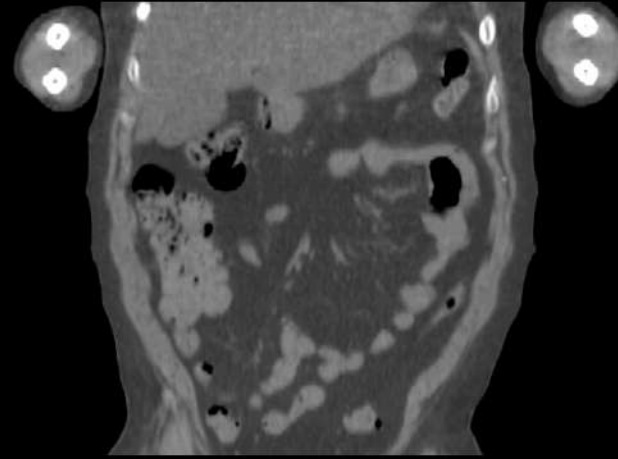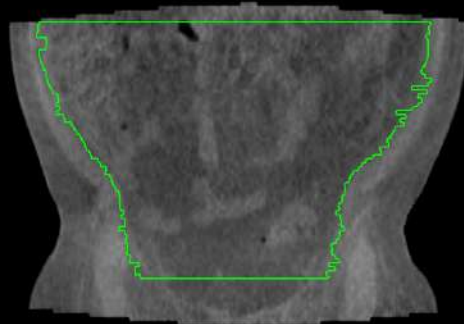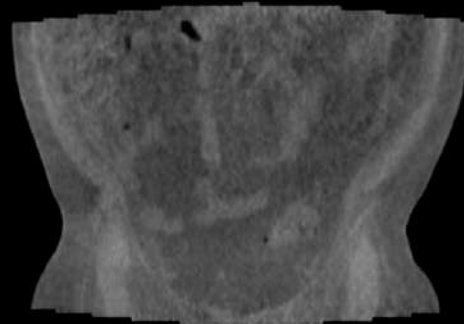

S1

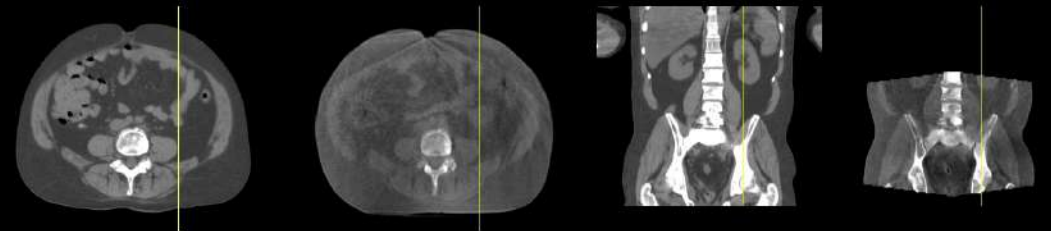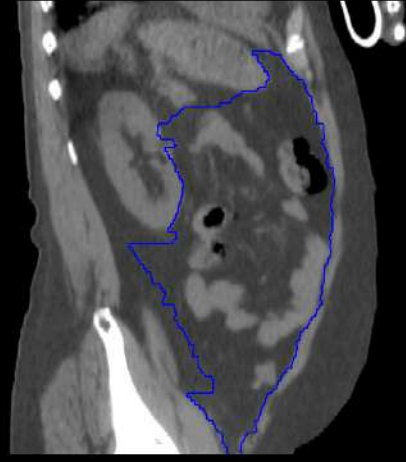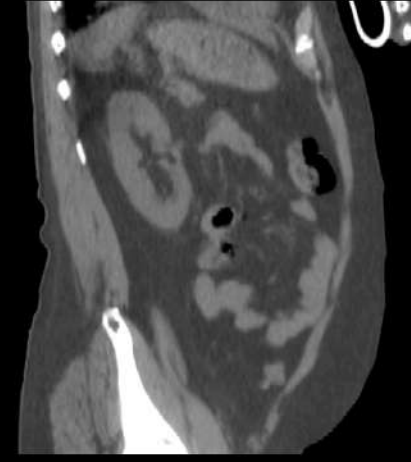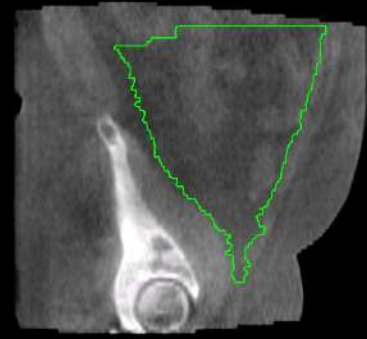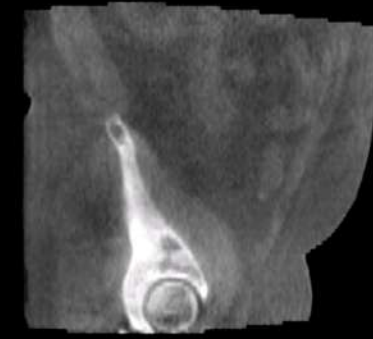

S2

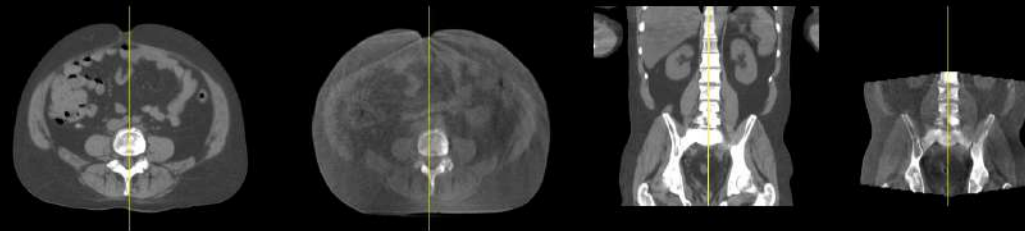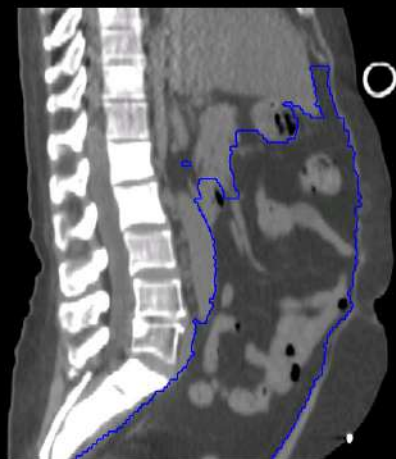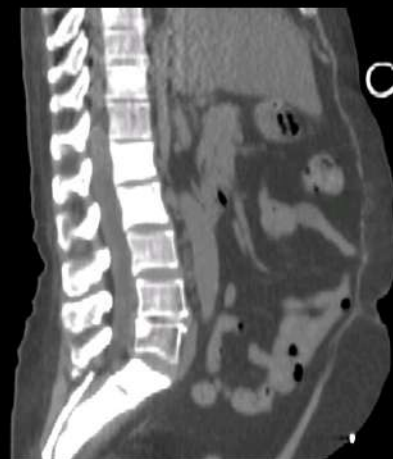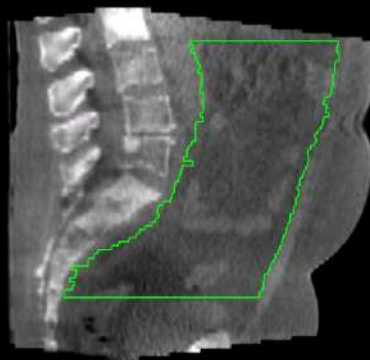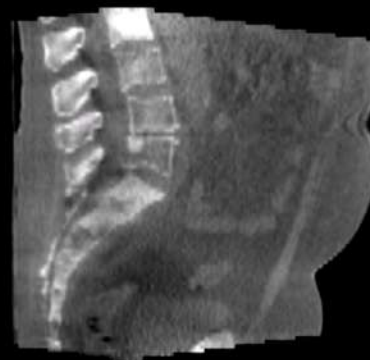

S3

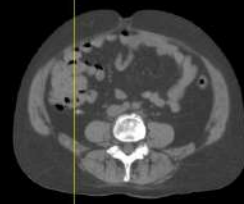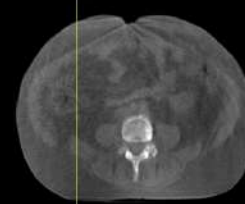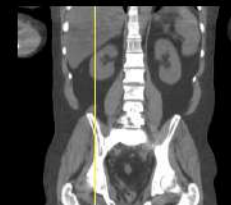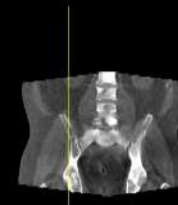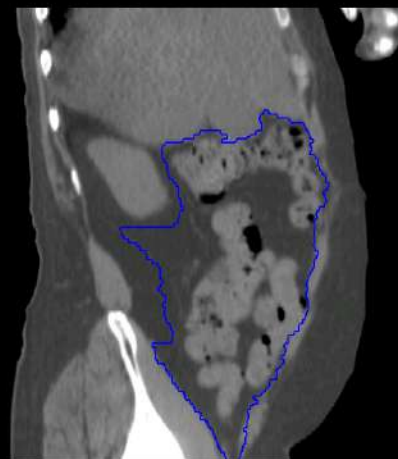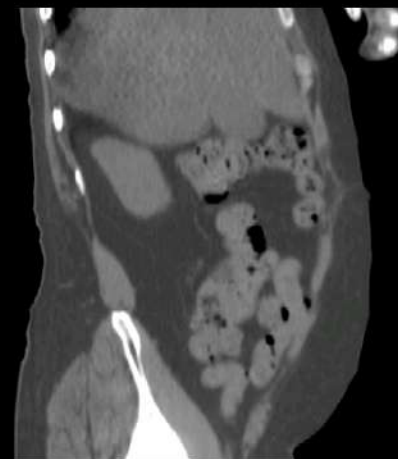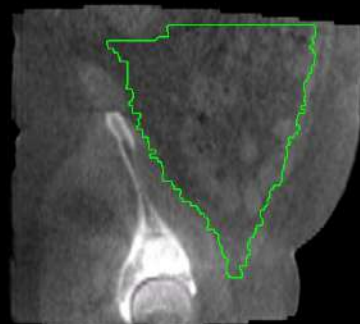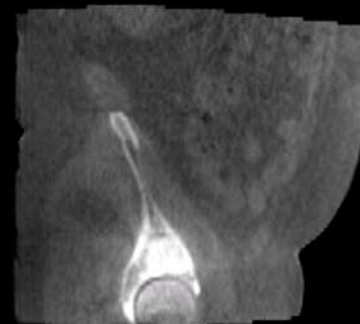

$T(y)=-3.60$

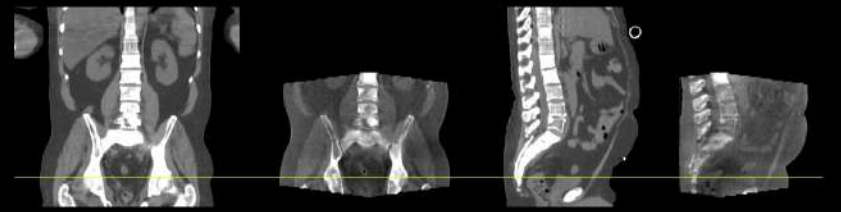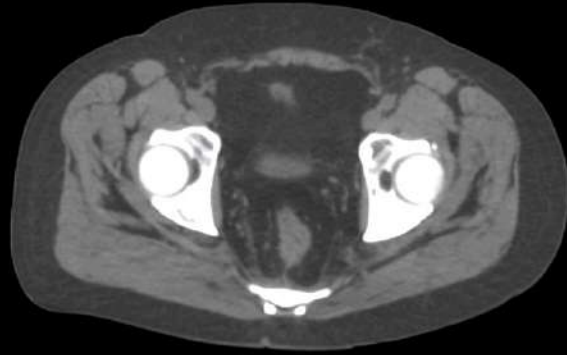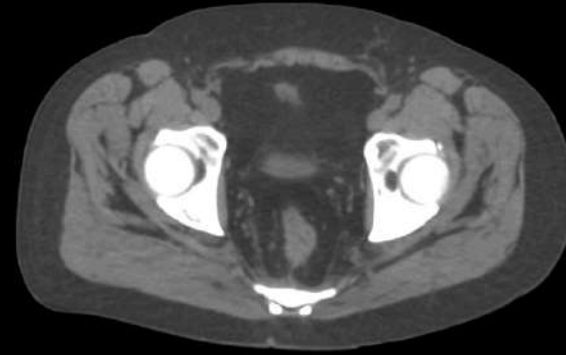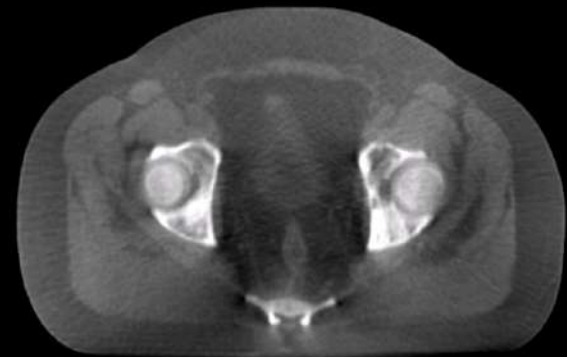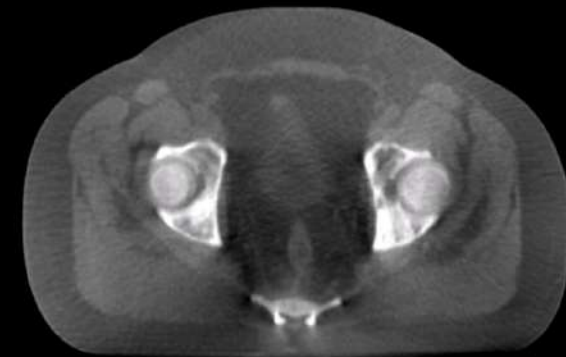

$T(y)=-2.70$

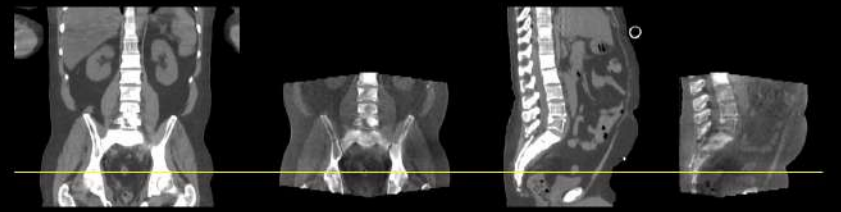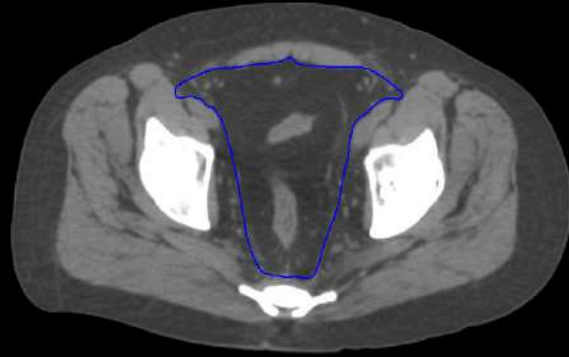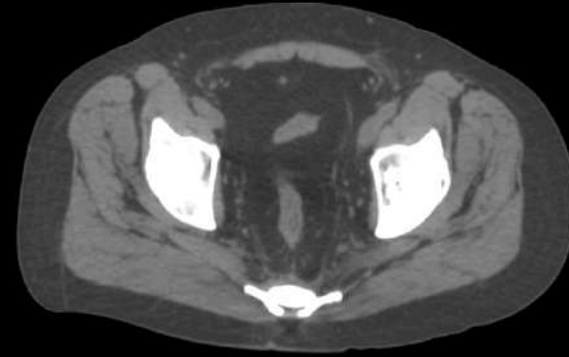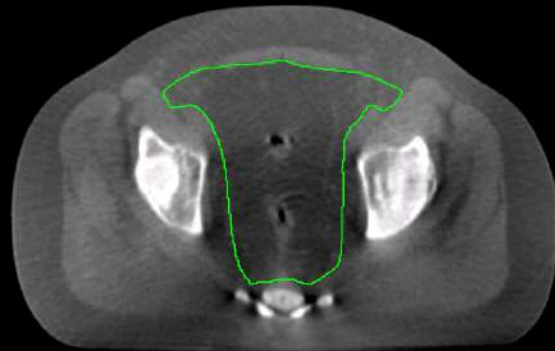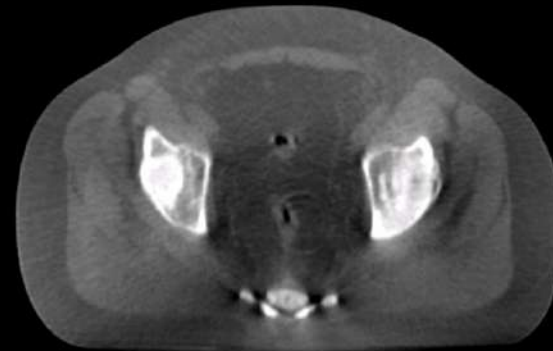



$T(y)=-1.80$

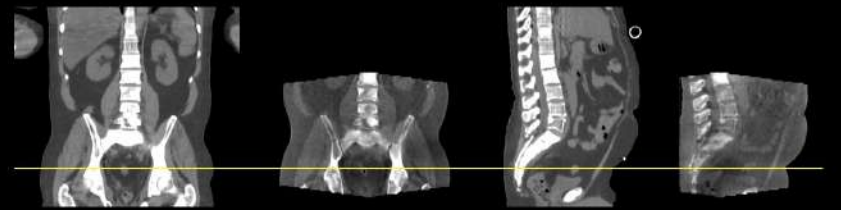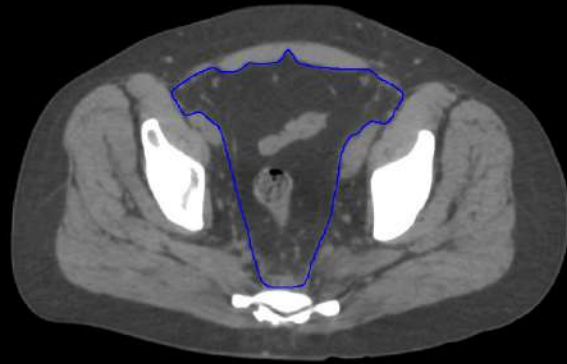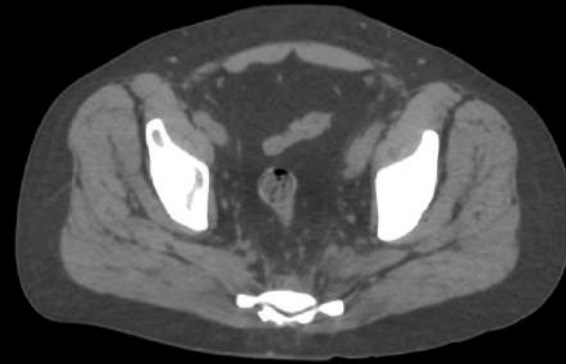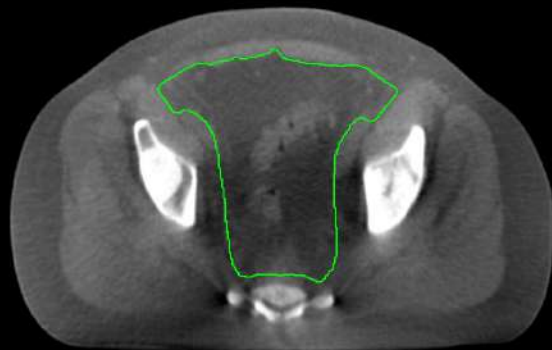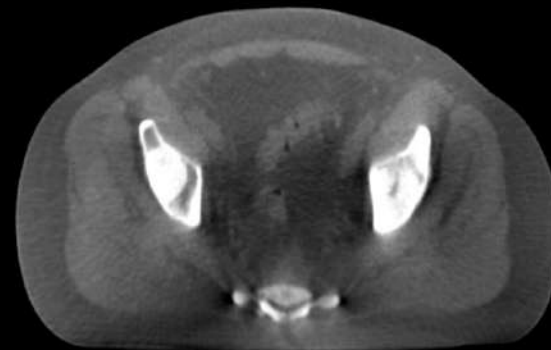

$T(y)=-0.90$

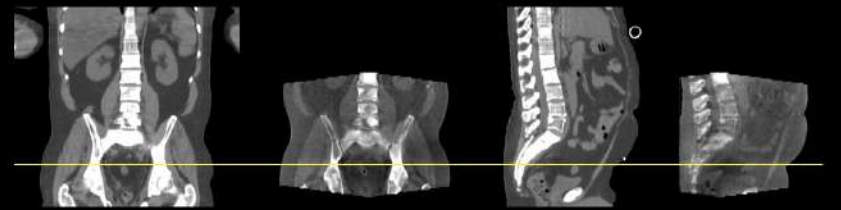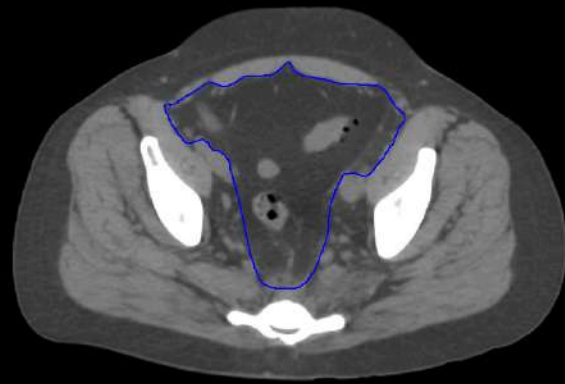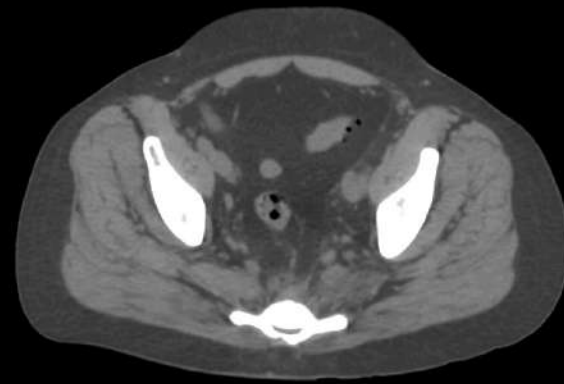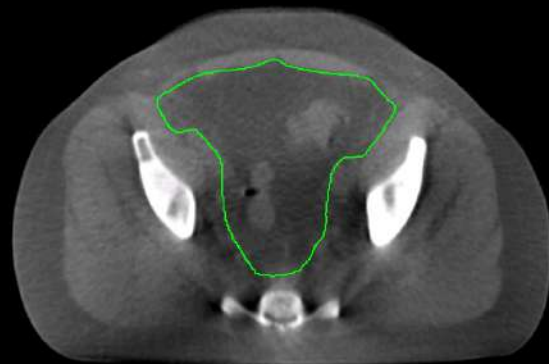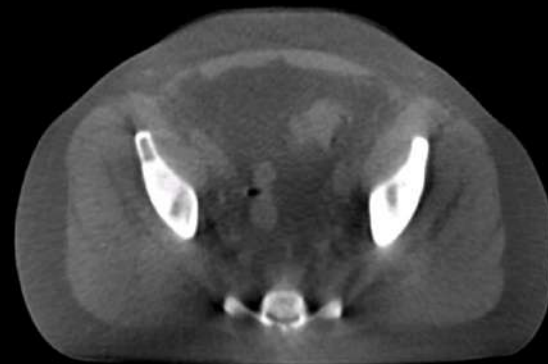



$T(y)=-0.00$

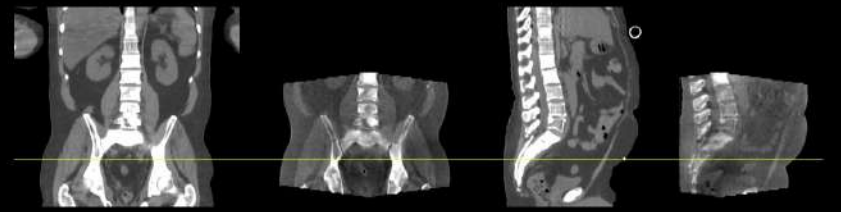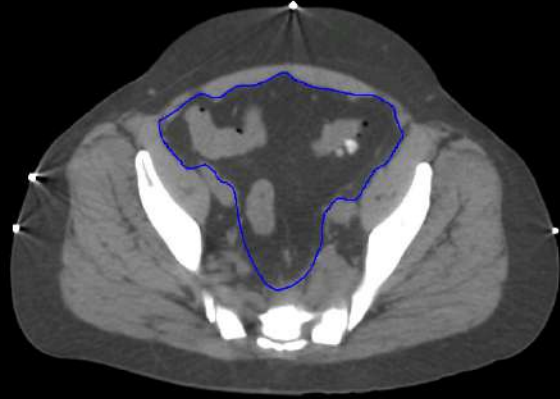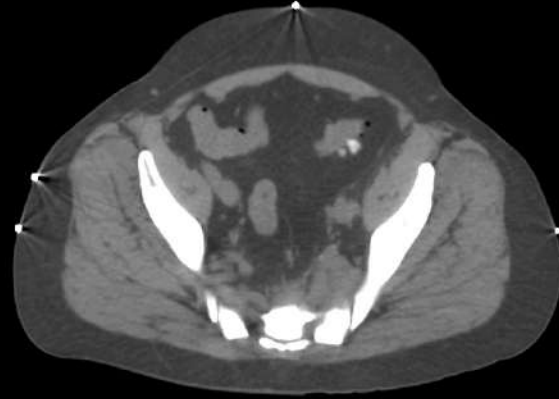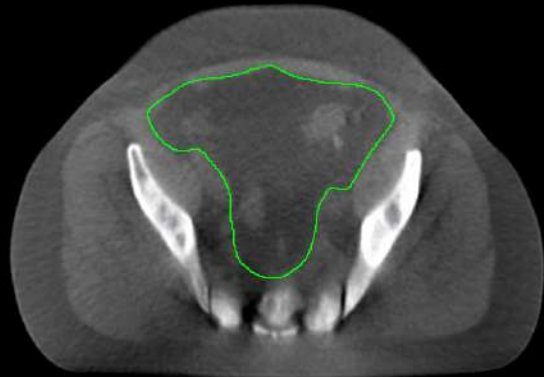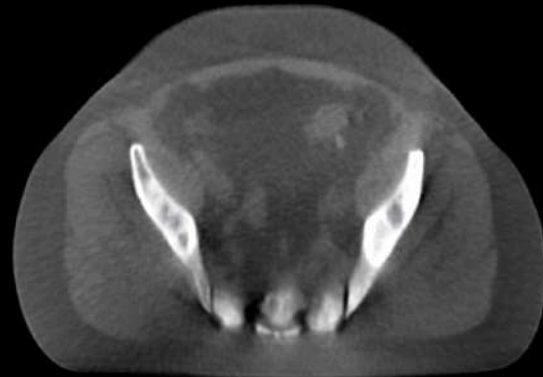

$T(y)=0.90$

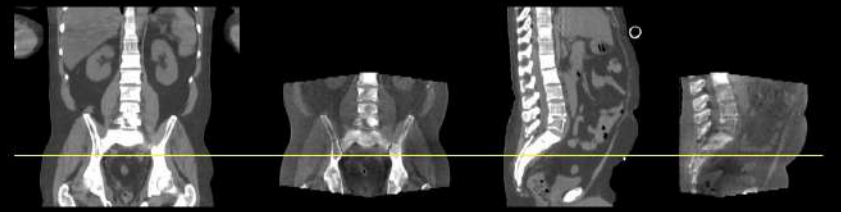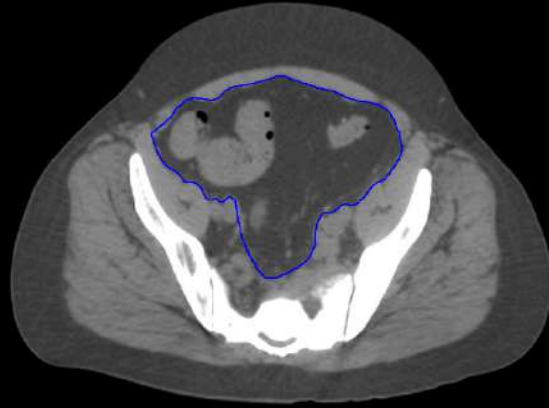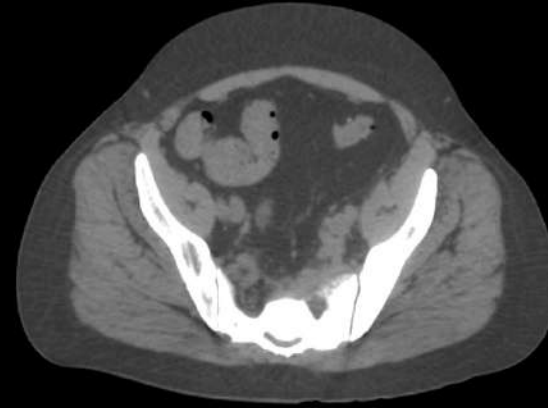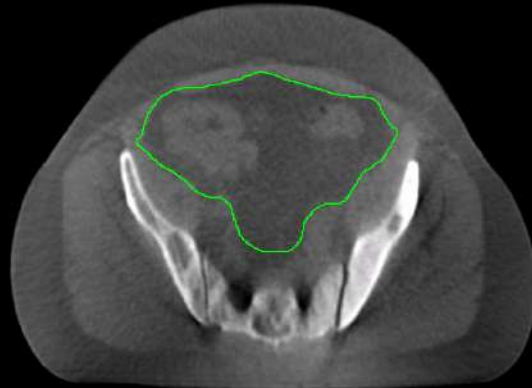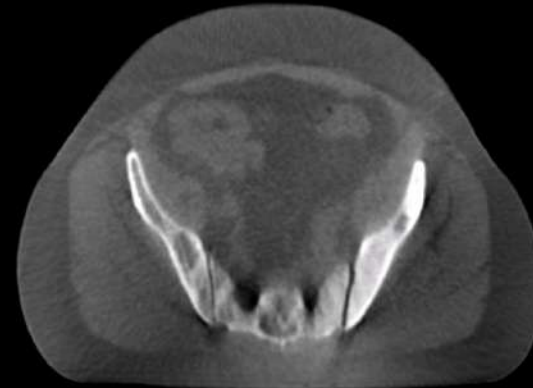

$T(y)=1.80$

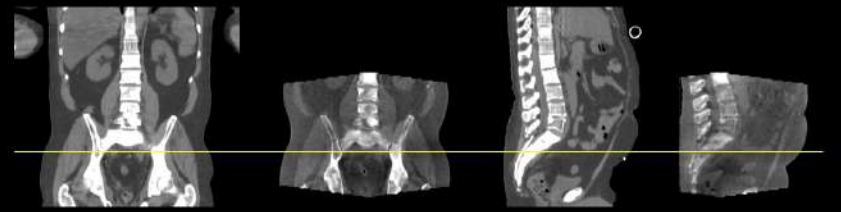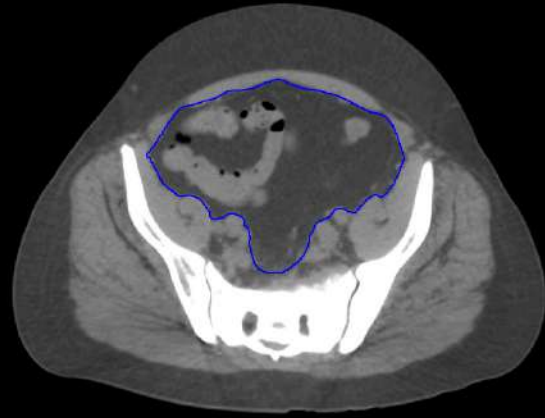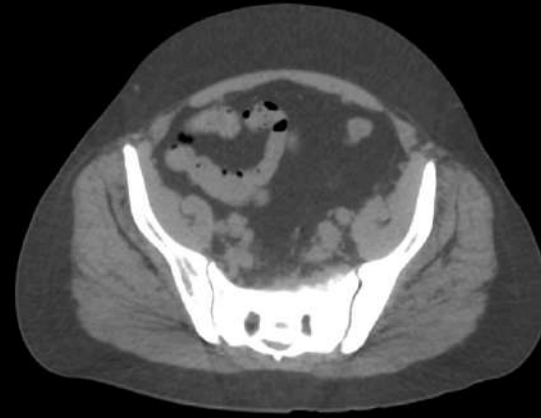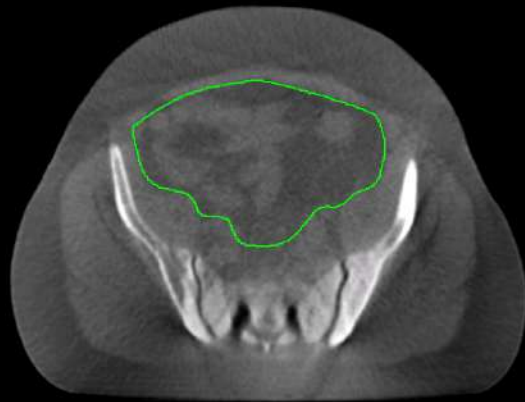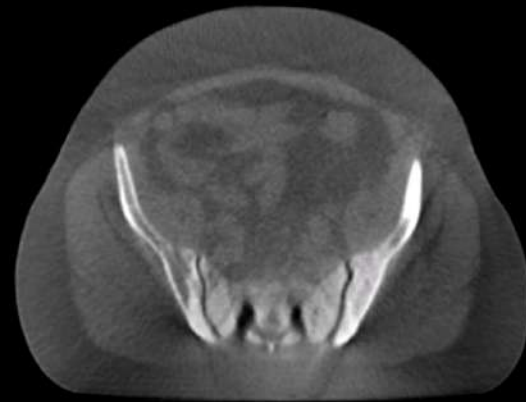

$T(y)=2.70$

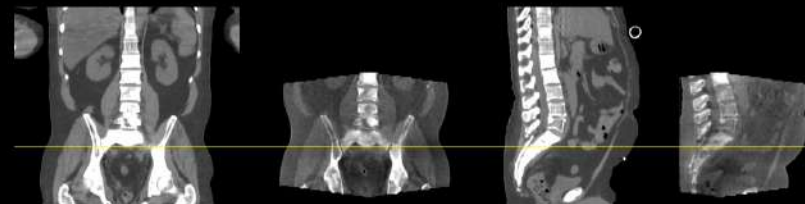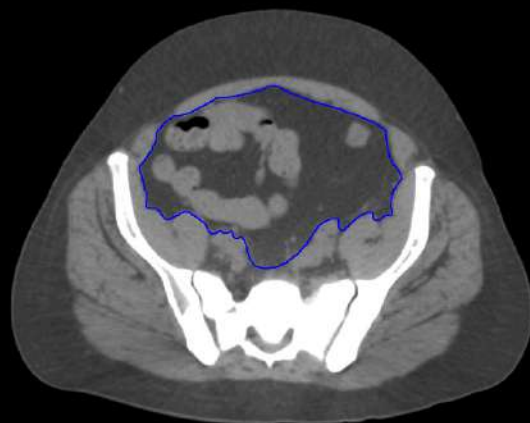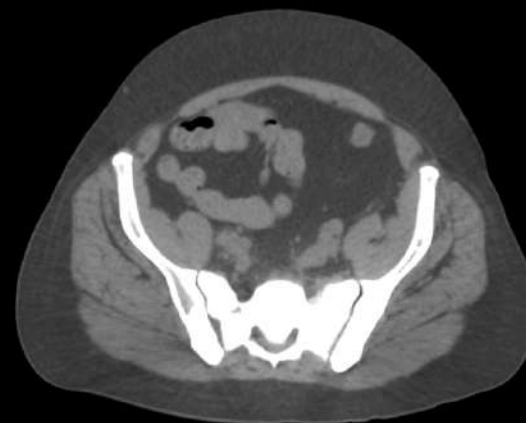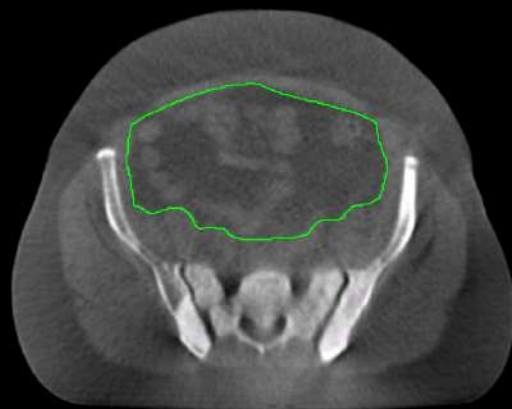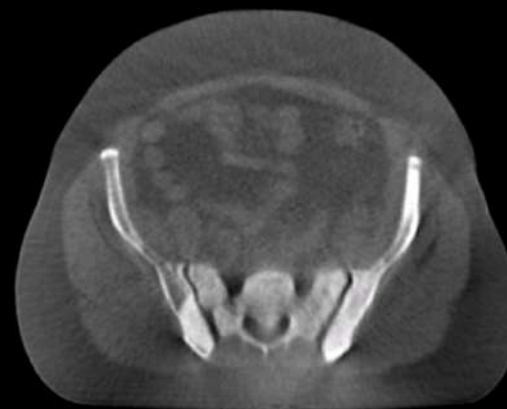

$T(y)=3.60$

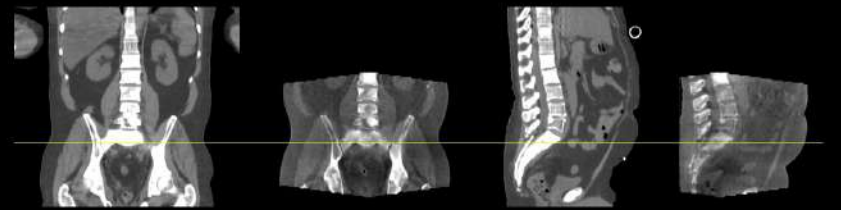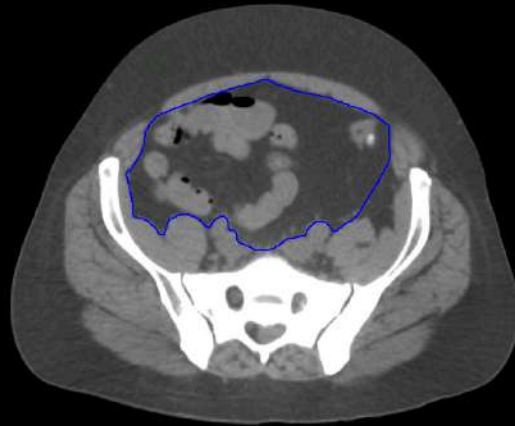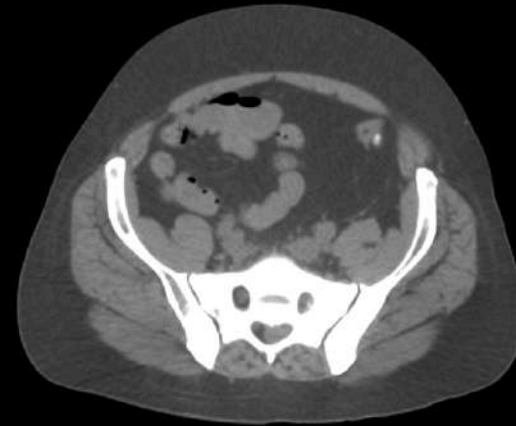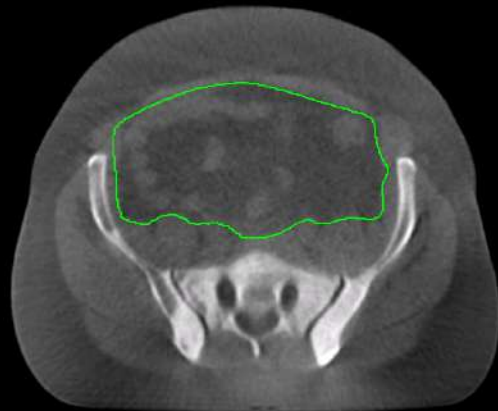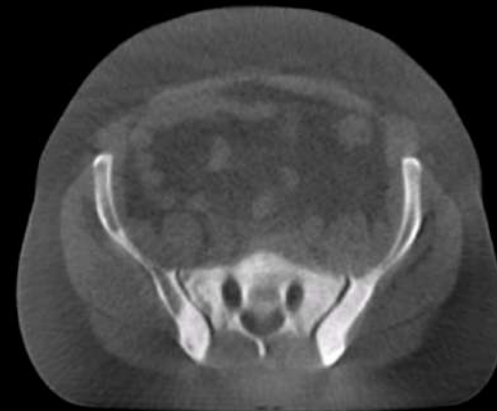



$T(y)=4.50$

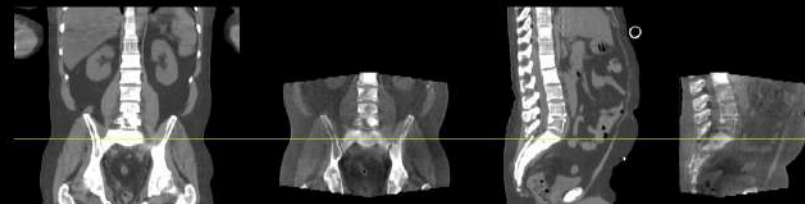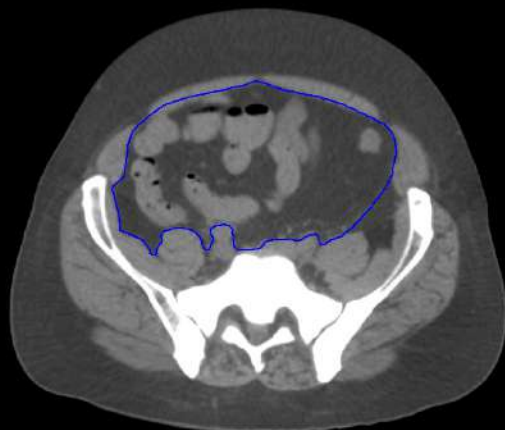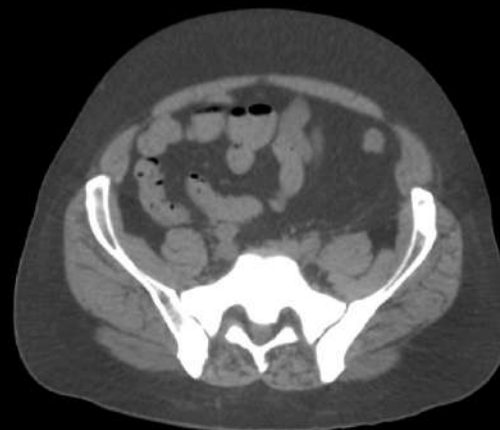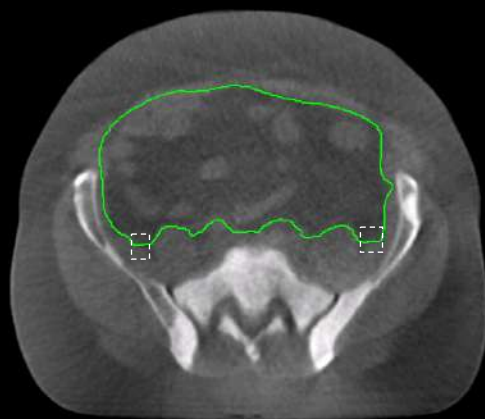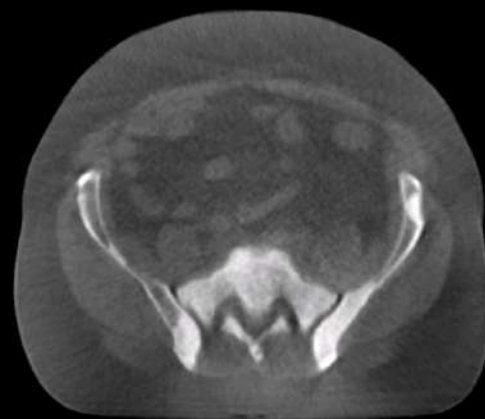

$T(y)=5.40$

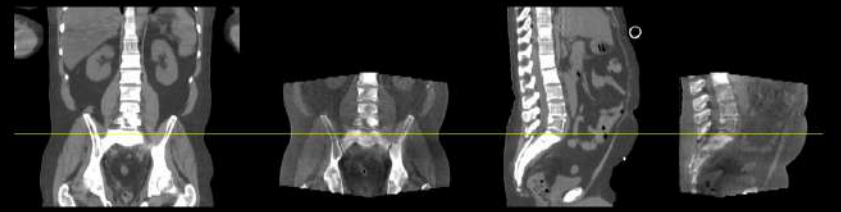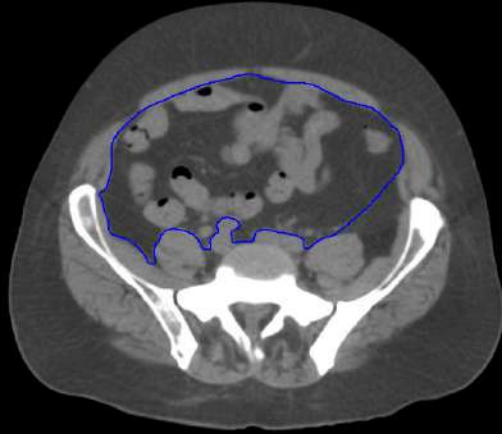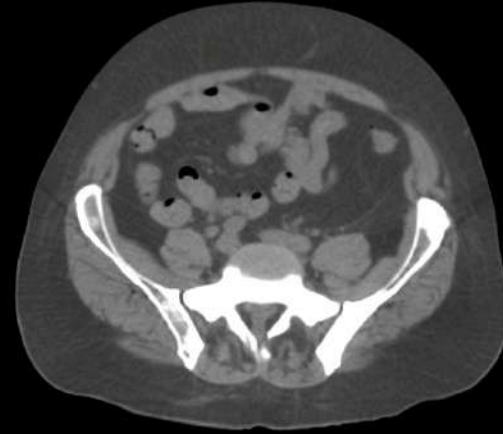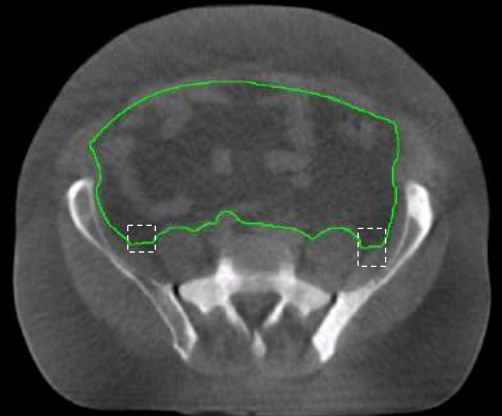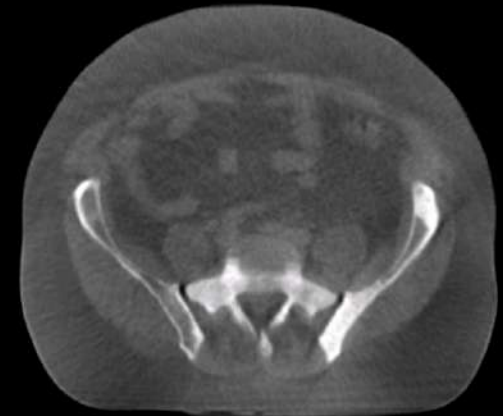

$T(y)=6.30$

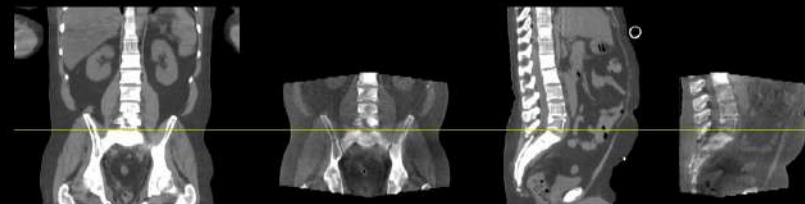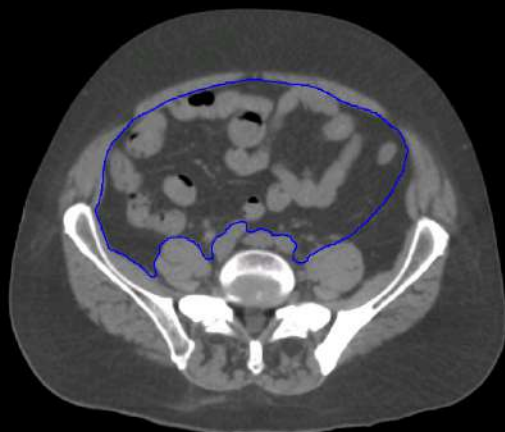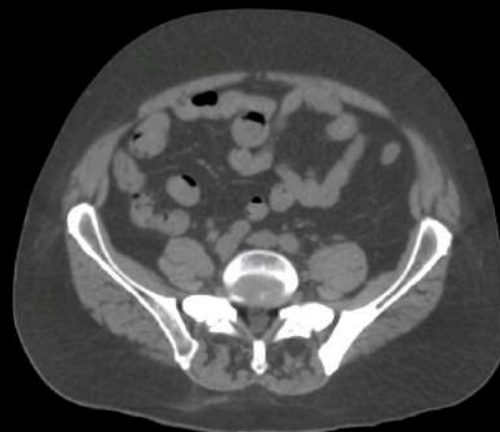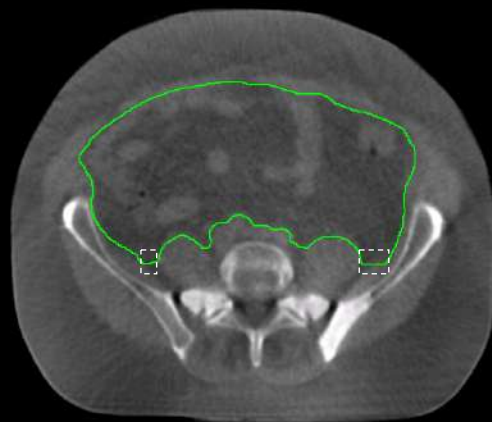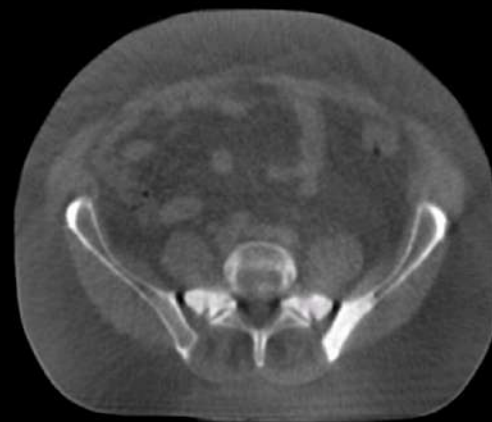



$T(y)=7.20$

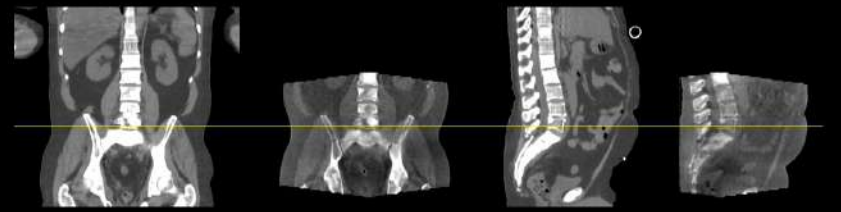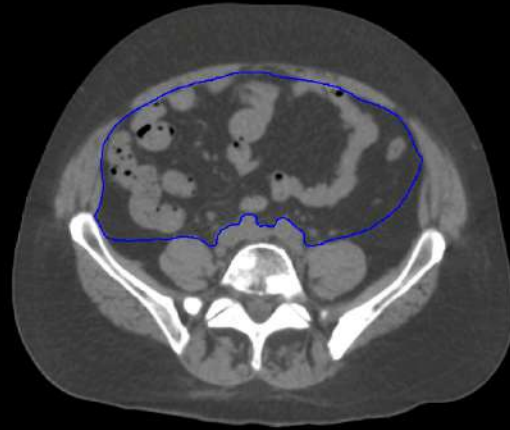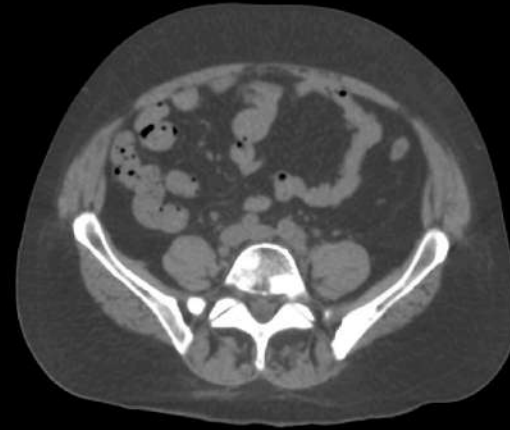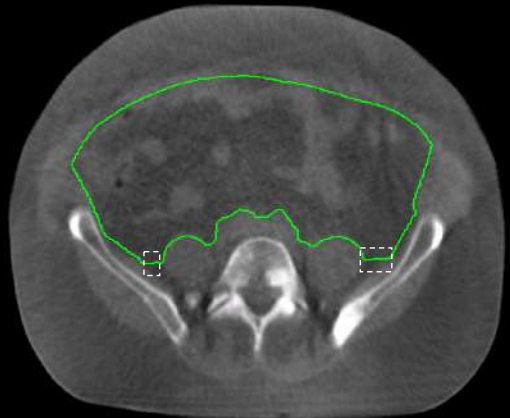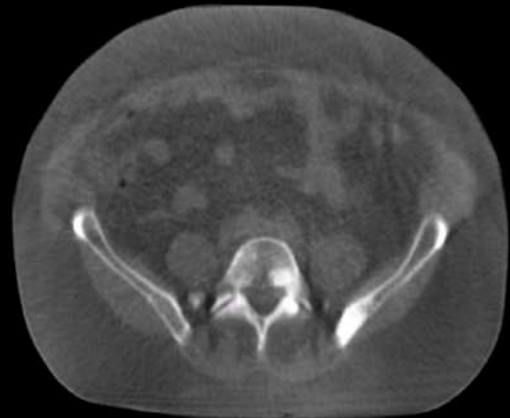

$T(y)=8.10$

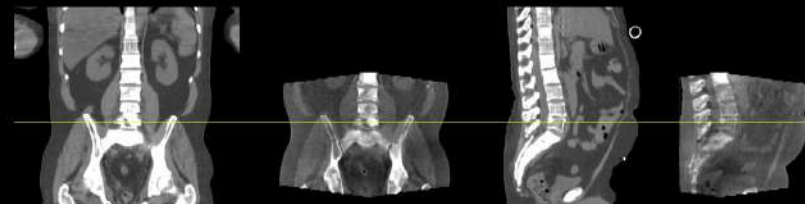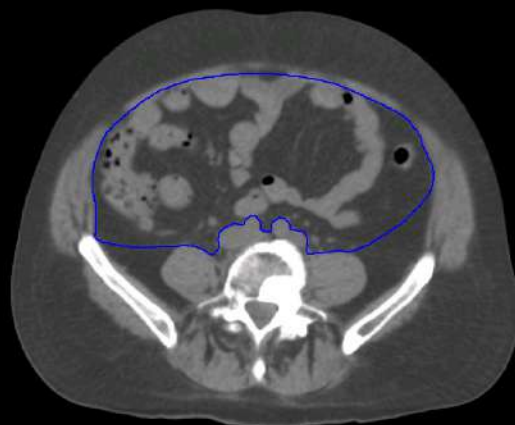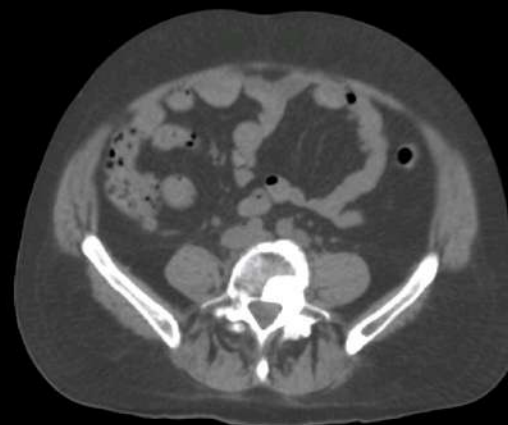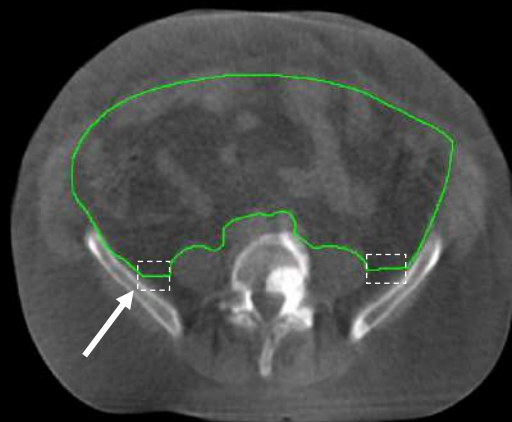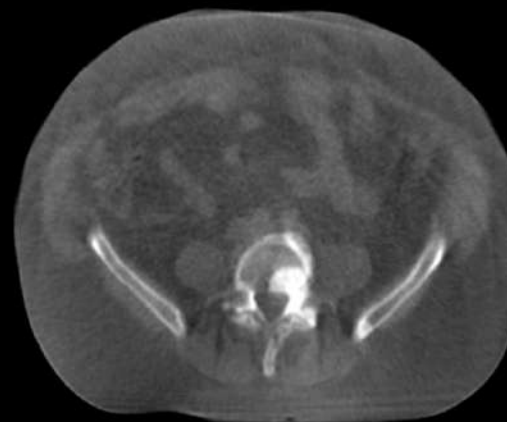

OD#1: lateral line from the lateral-most aspect of the psoas major to intersect the iliacus

$T(y)=9.00$

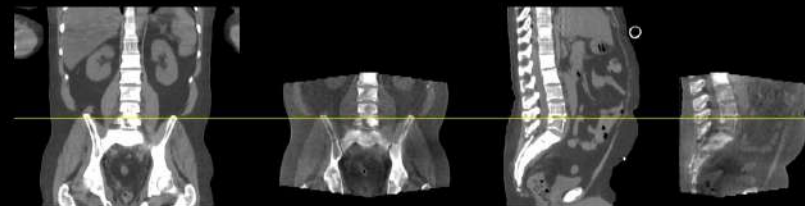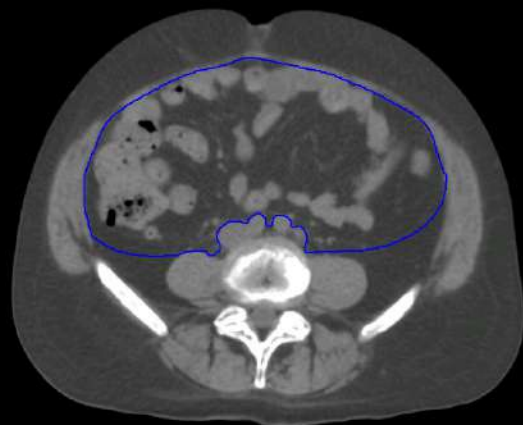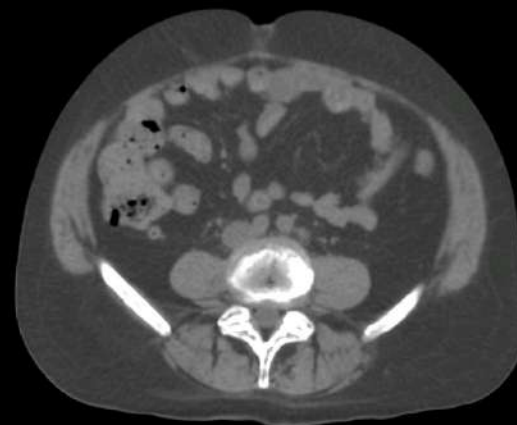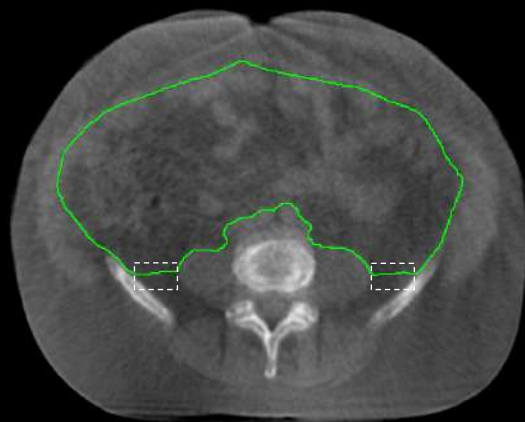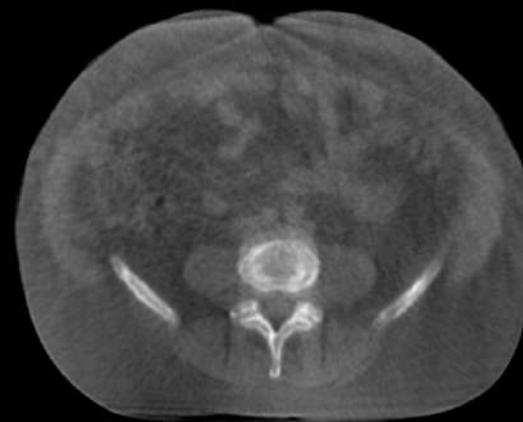

$T(y)=9.90$

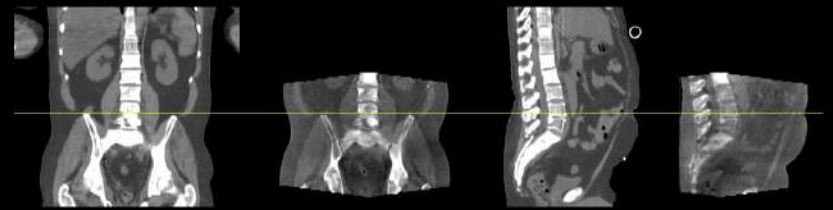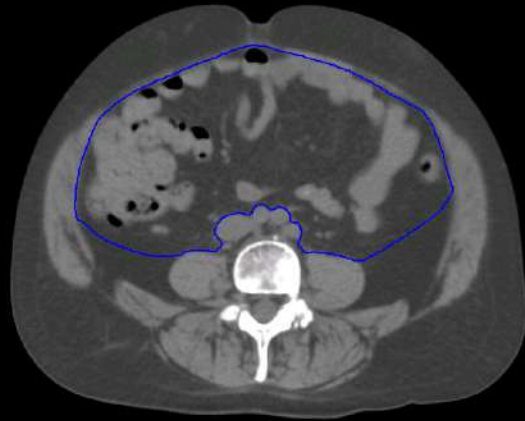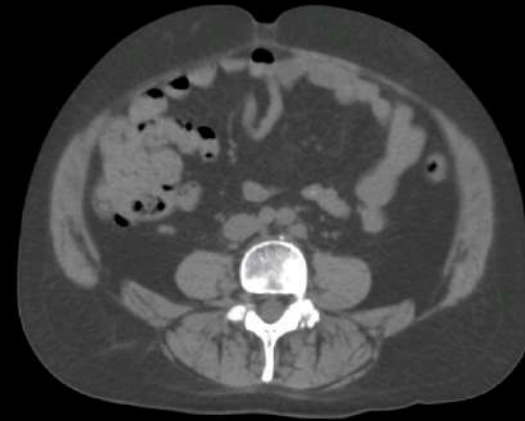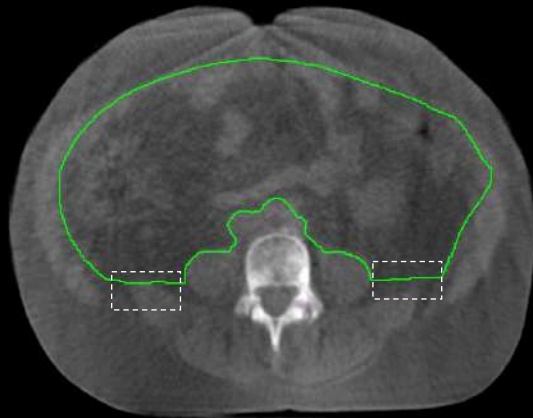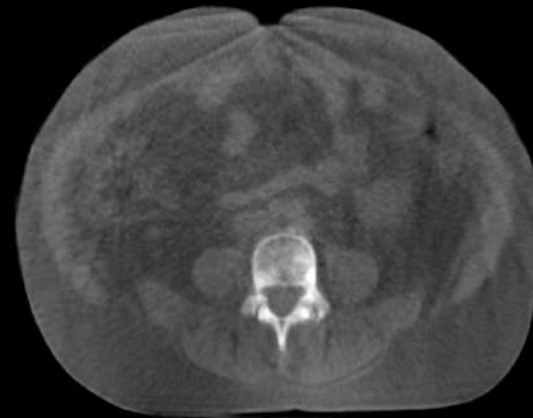

$T(y)=10.80$

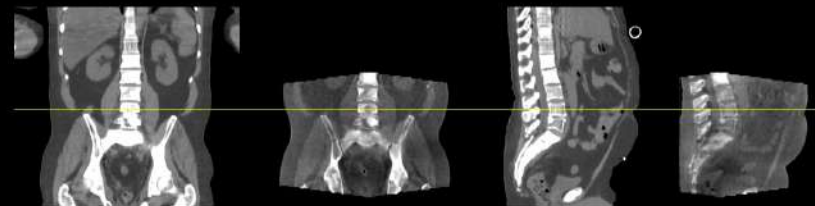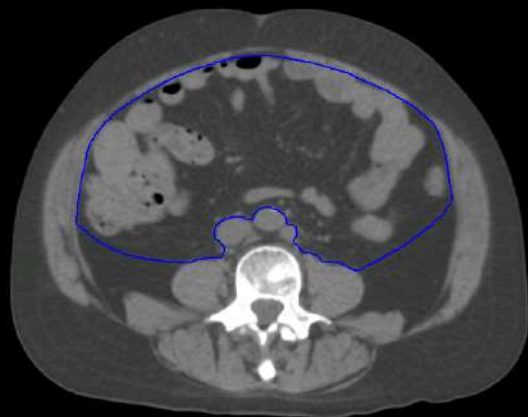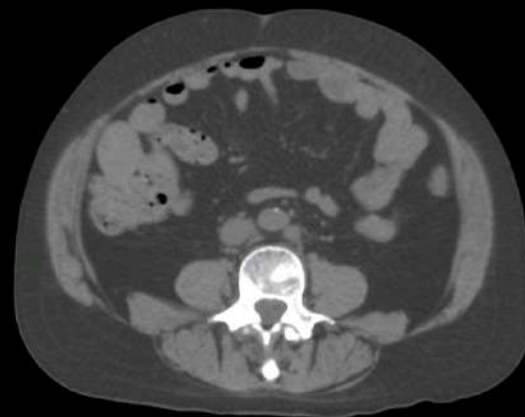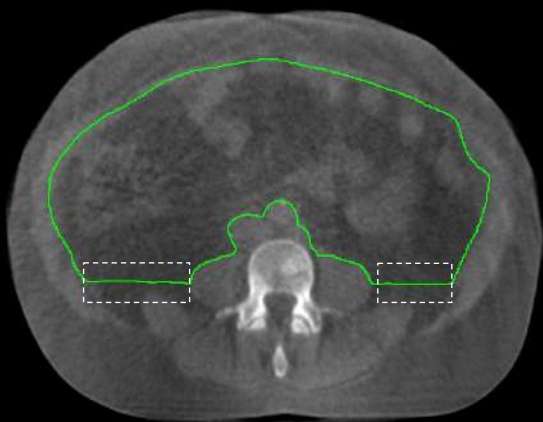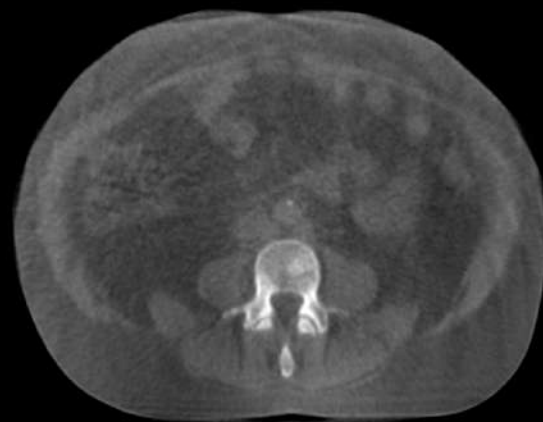



T(y)=11.40

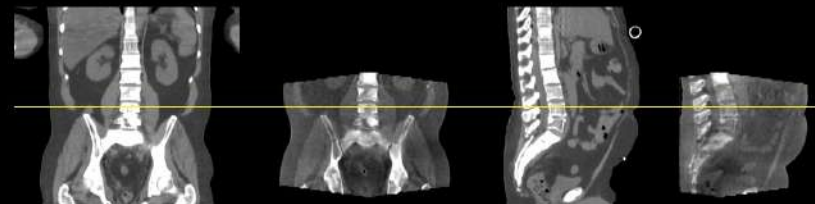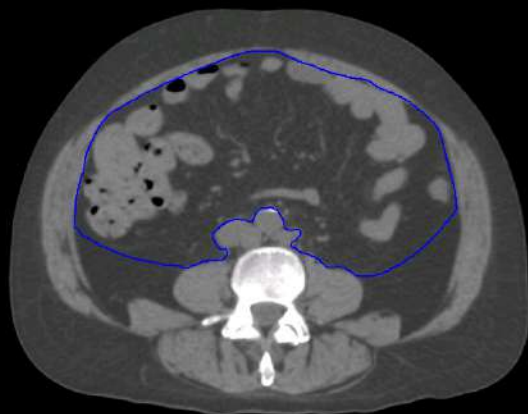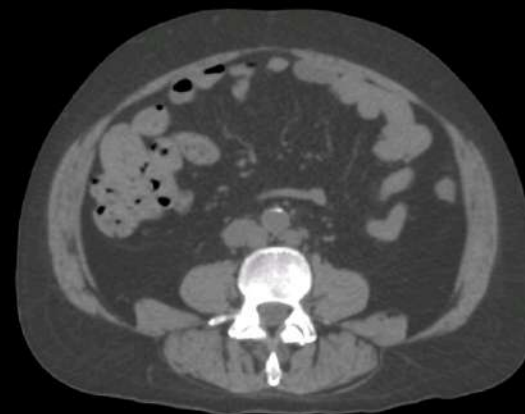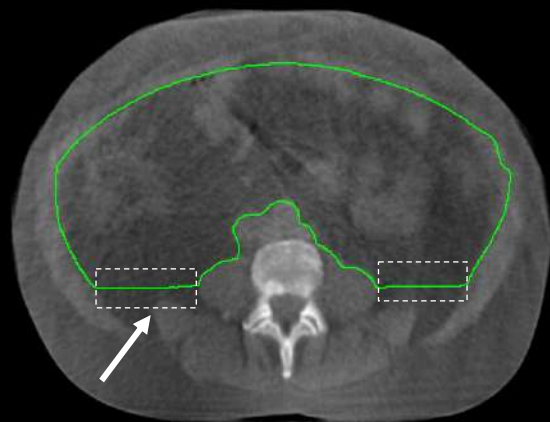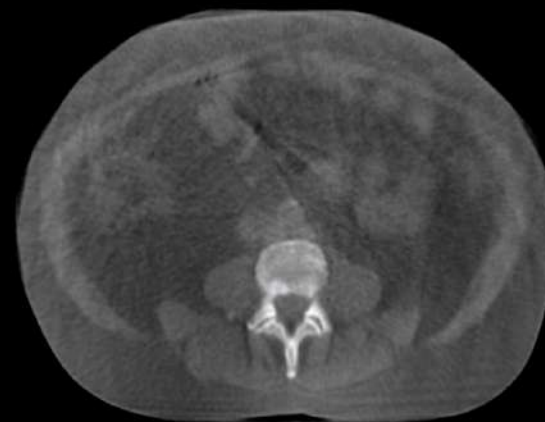

OD#1: lateral line from the lateral-most aspect of the psoas major to intersect the transverse abdominis

$T(y)=11.70$

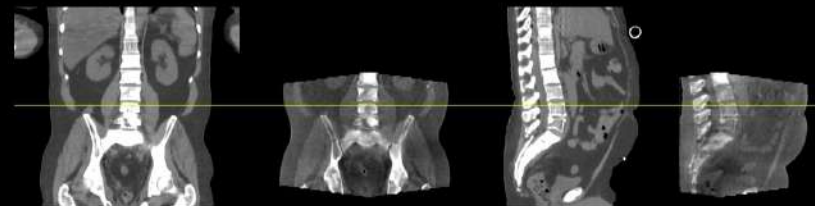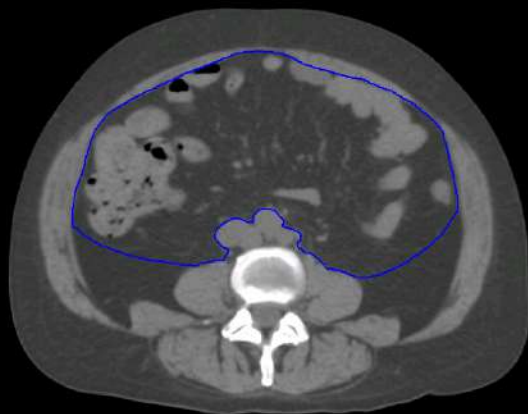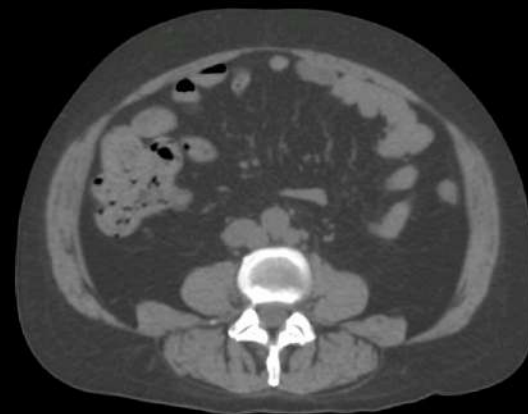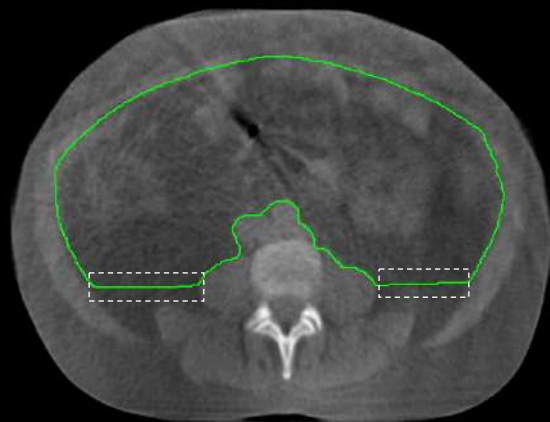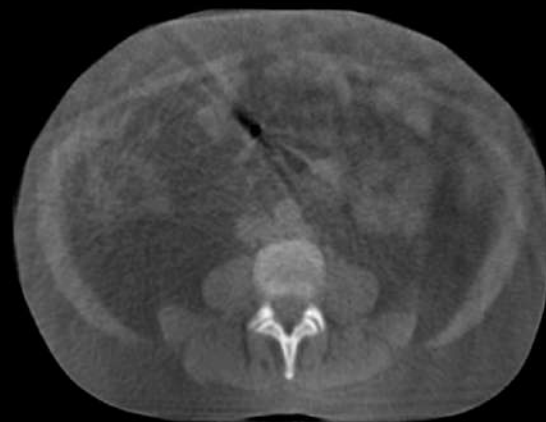

$T(y)=12.60$

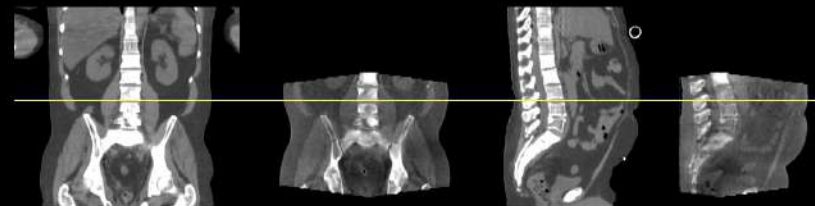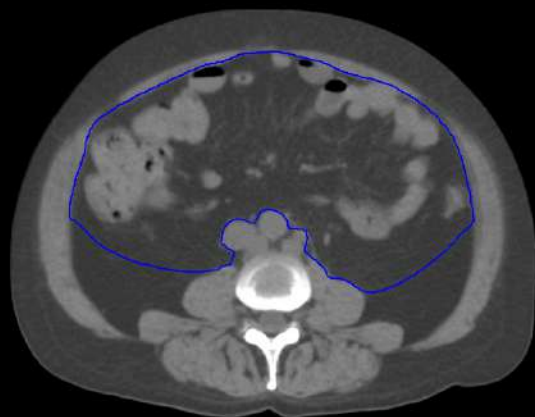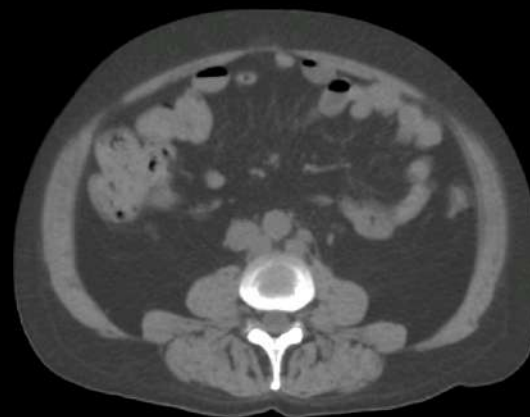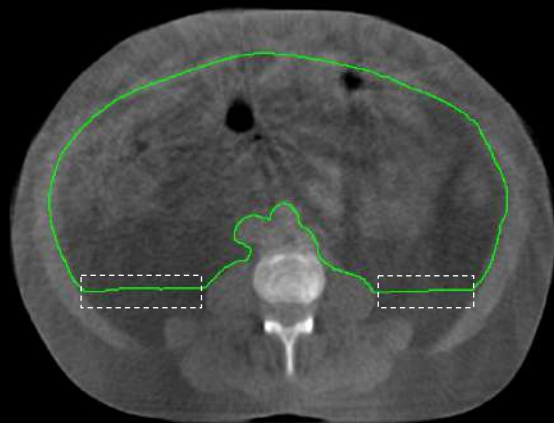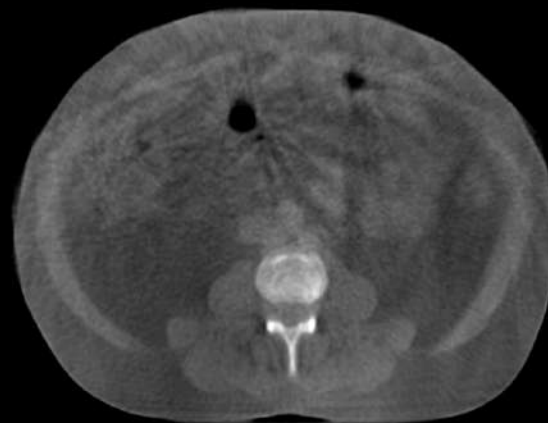



$T(y)=13.50$

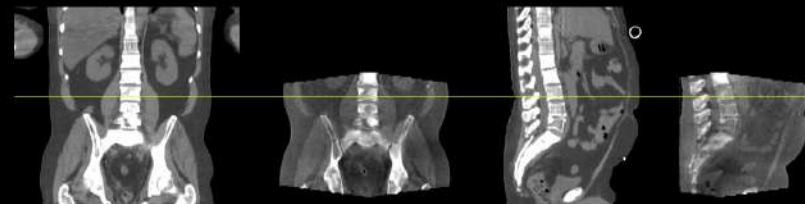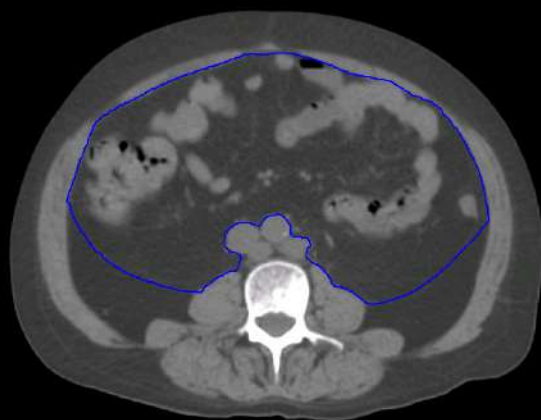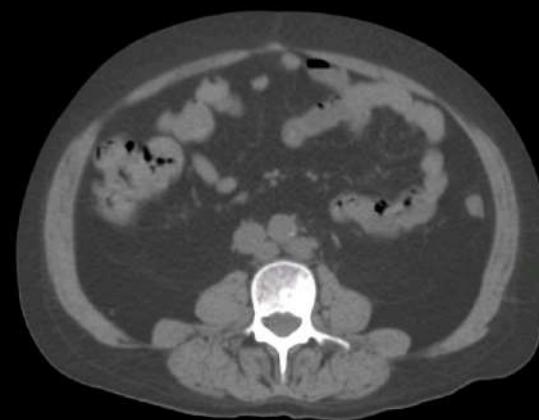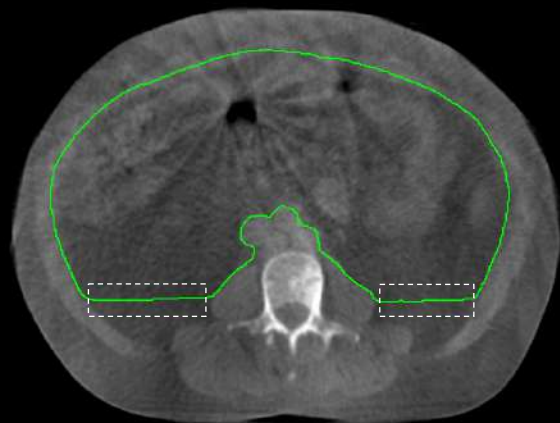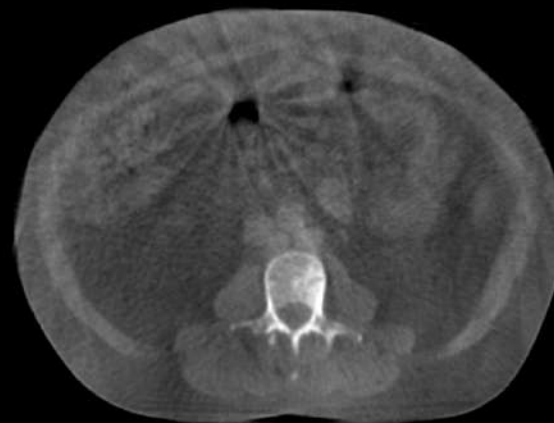

$T(y)=14.40$

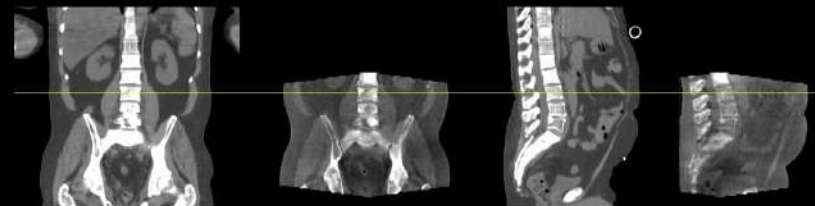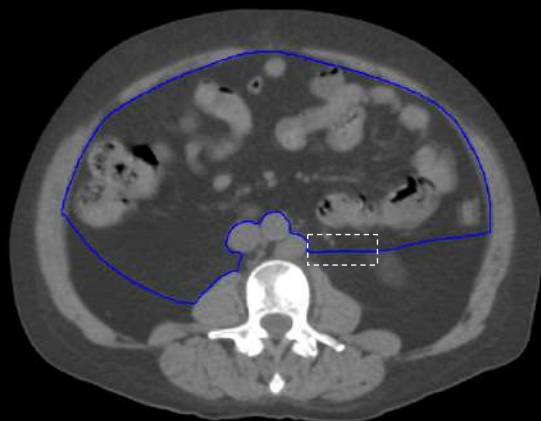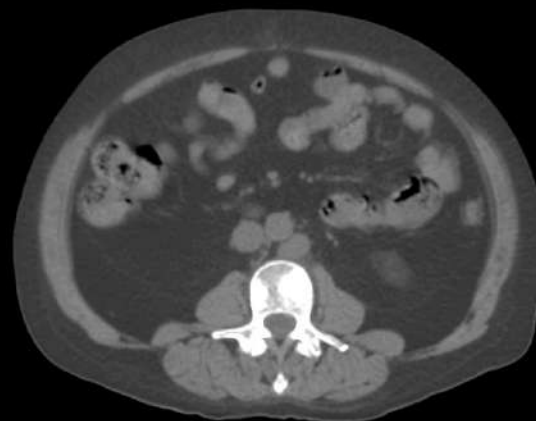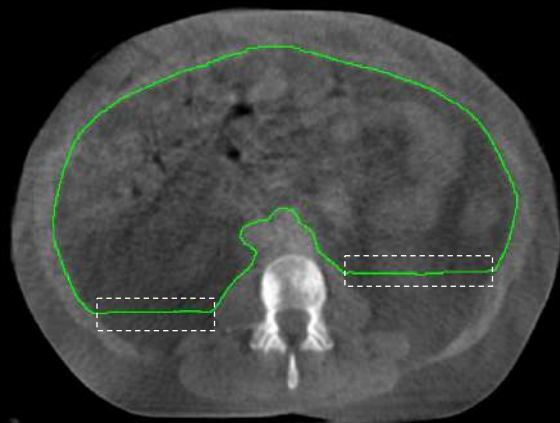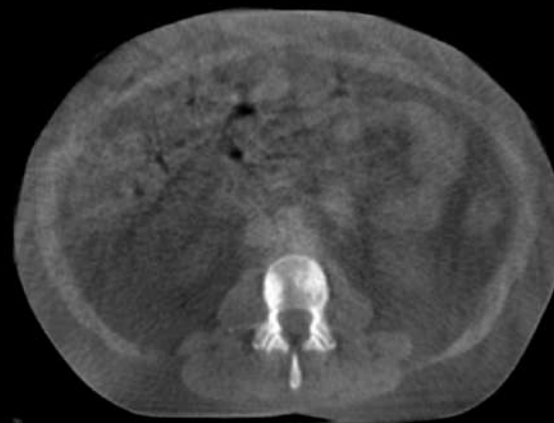

$T(y)=15.30$

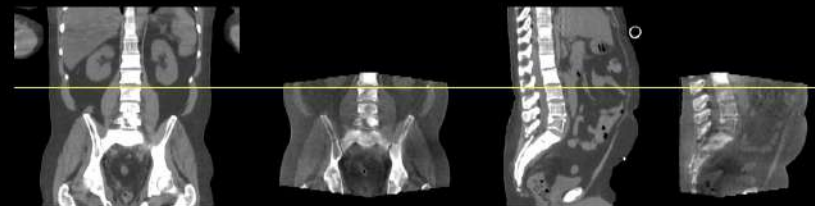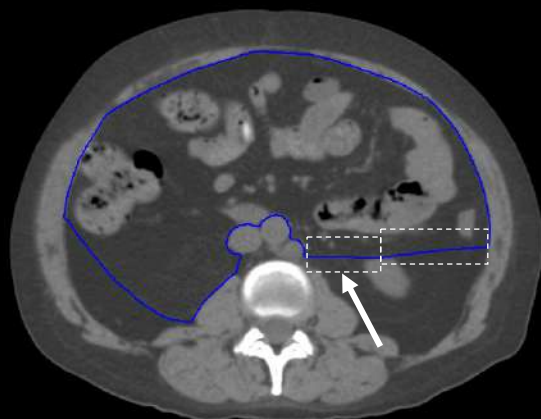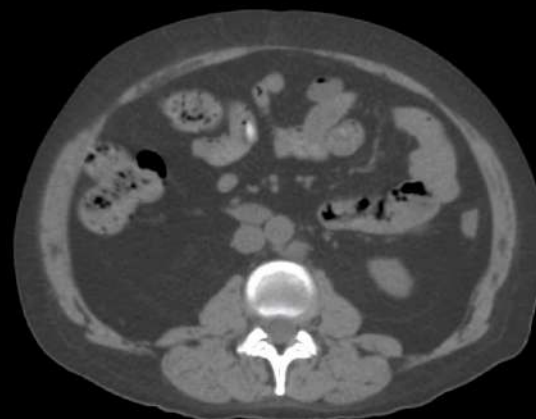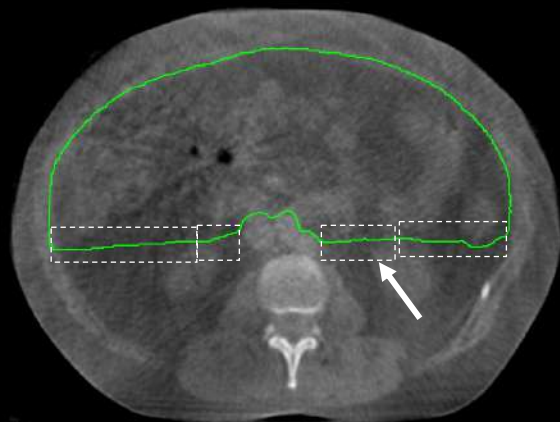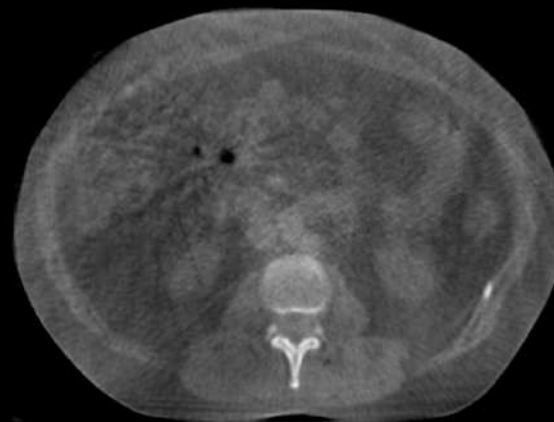

OD#3: straight line from the anterior-most aspect of the kidney to the lateral-most aspect of the central vessel/aorta/IVC

$T(y)=15.60$

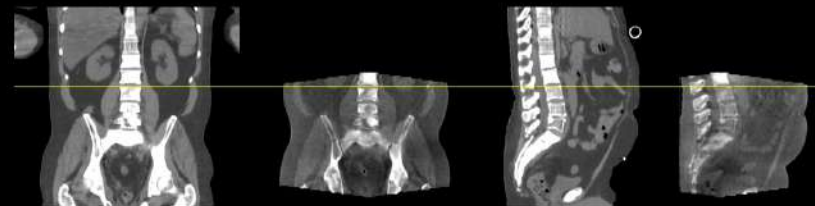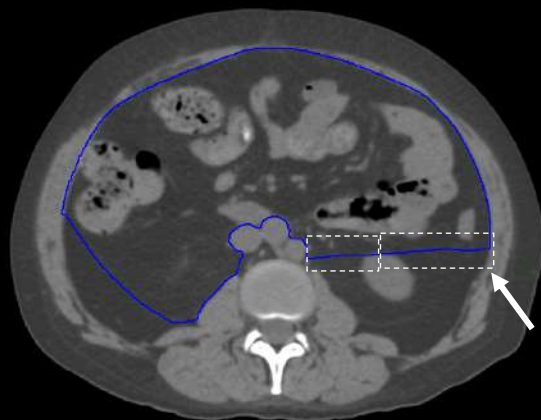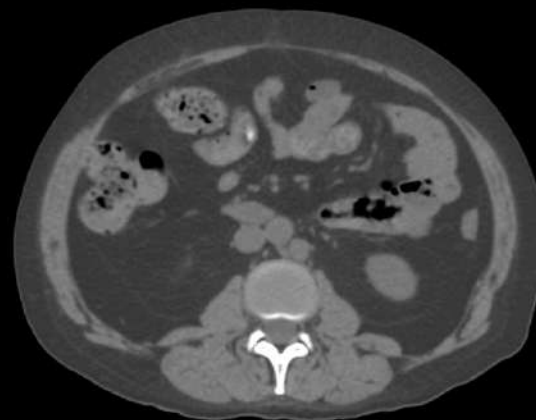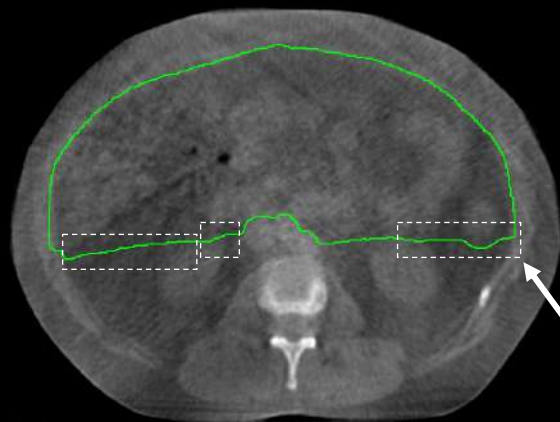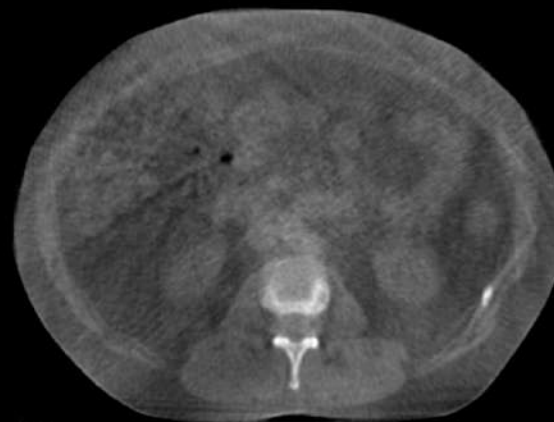

OD#2: straight line from the anterior-most aspect of the kidney to intersect the transverse abdominis

$T(y)=15.90$

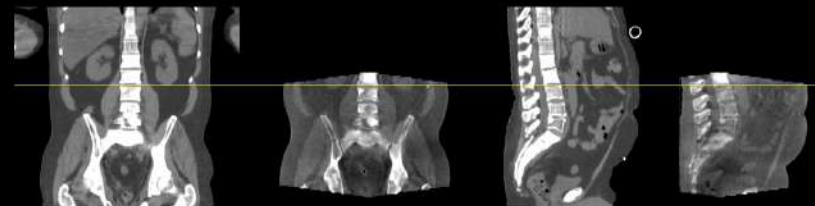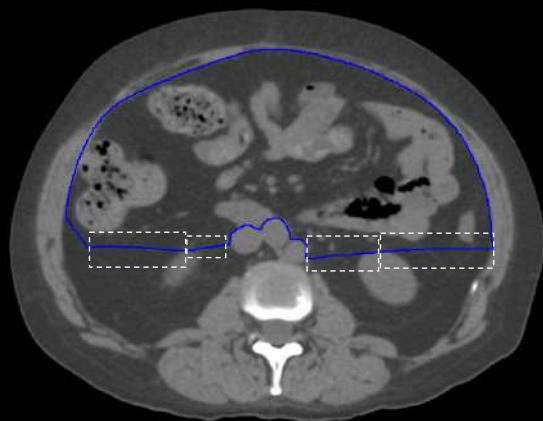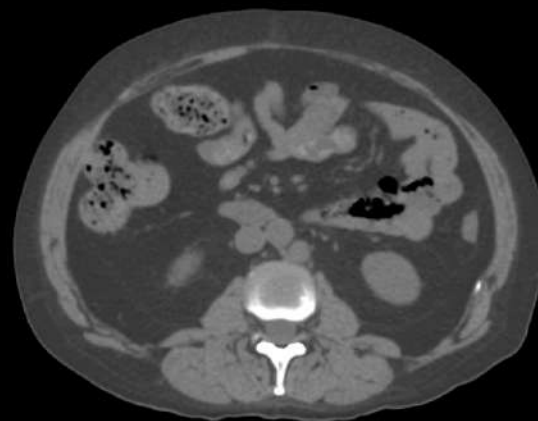



$T(y)=16.80$

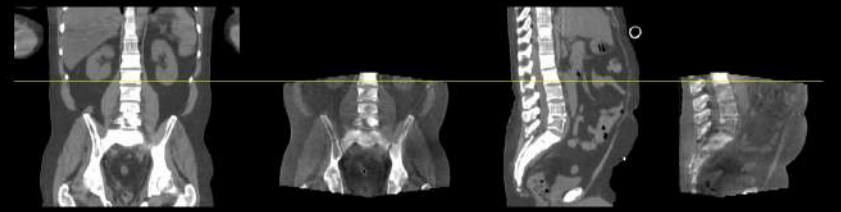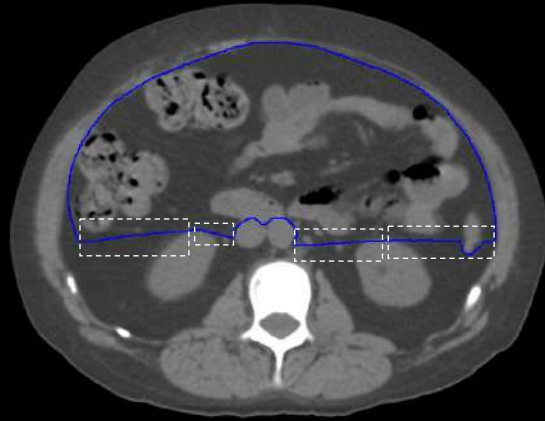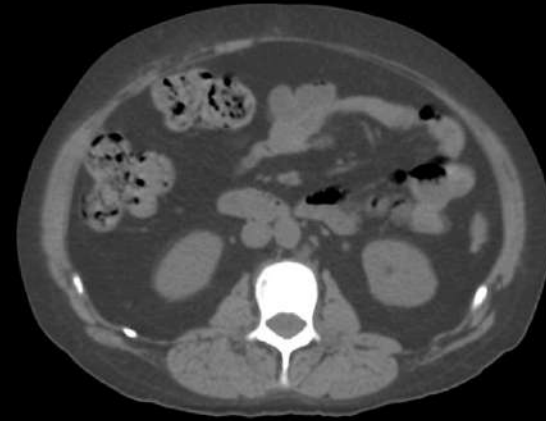

$T(y)=17.70$

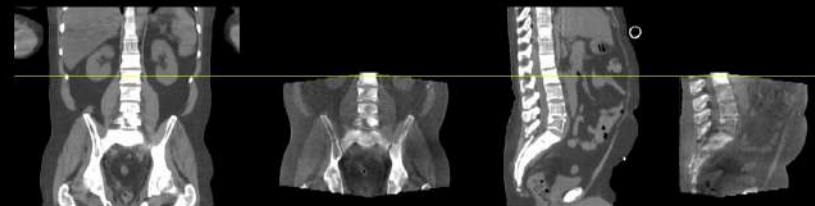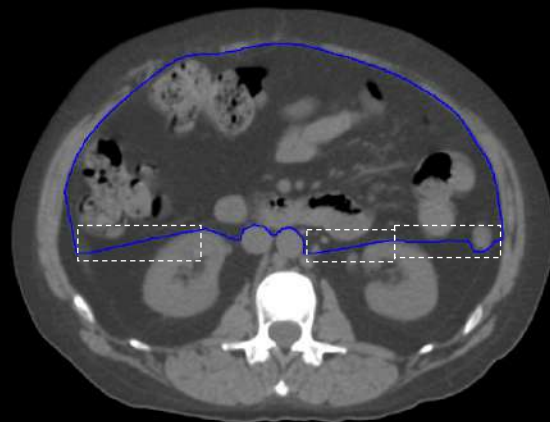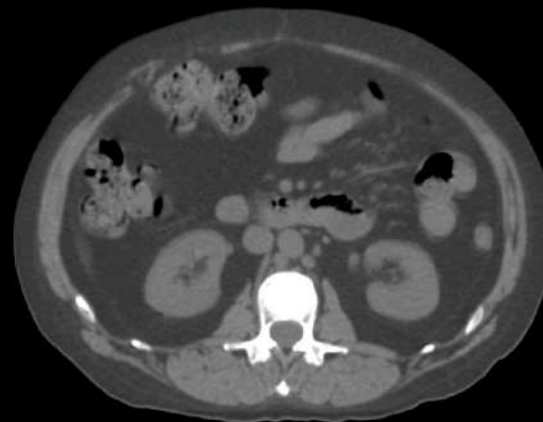

T(y)=18.60

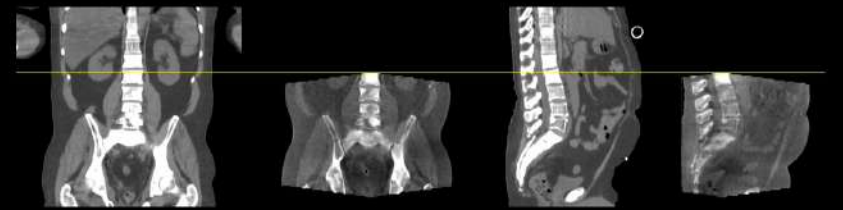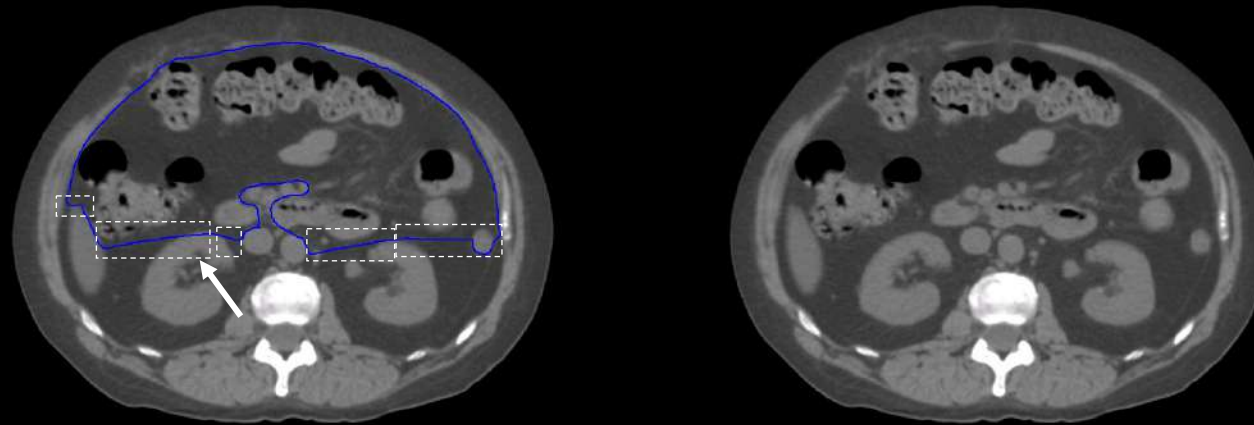

OD#4: lateral (R) line from the anterior-most aspect of the kidney to the liver



$T(y)=19.50$

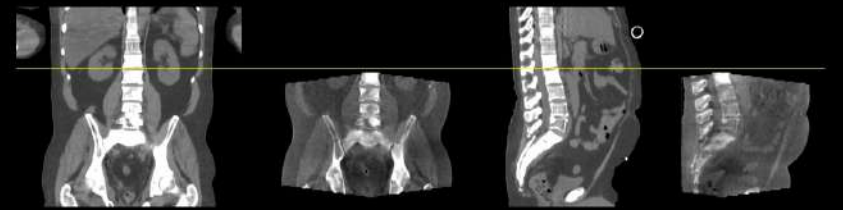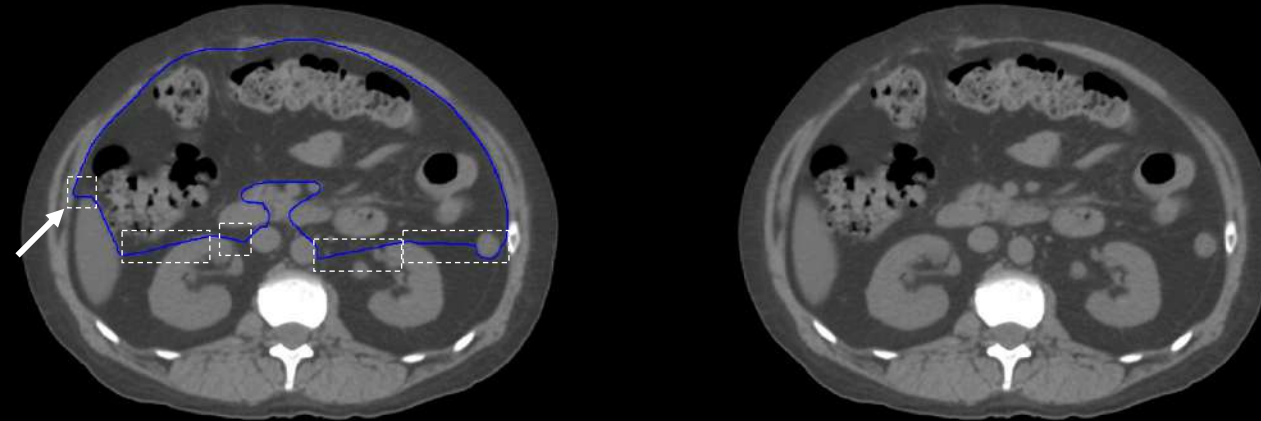

OD#9: lateral (R) line from the anterior-most aspect of the liver to intersect the transverse abdominis

$T(y)=20.40$

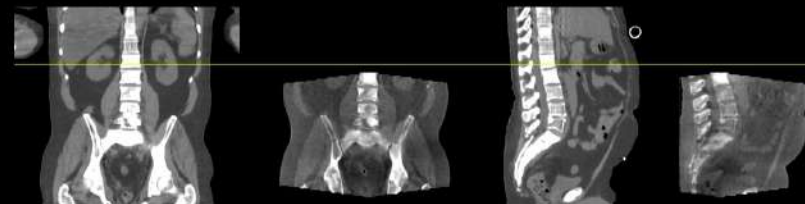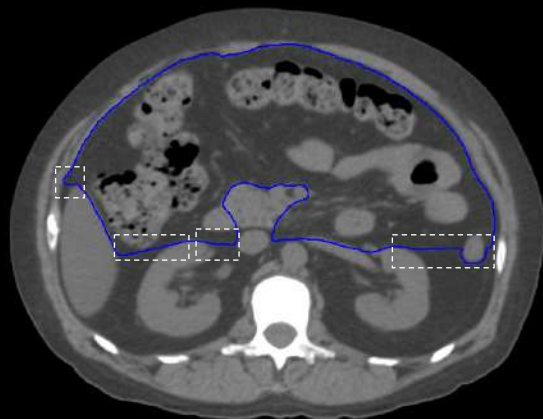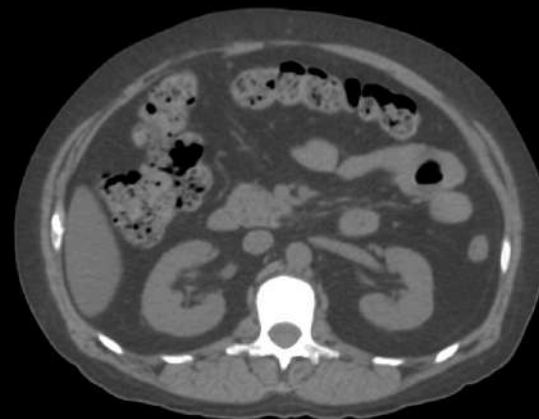

$T(y)=21.30$

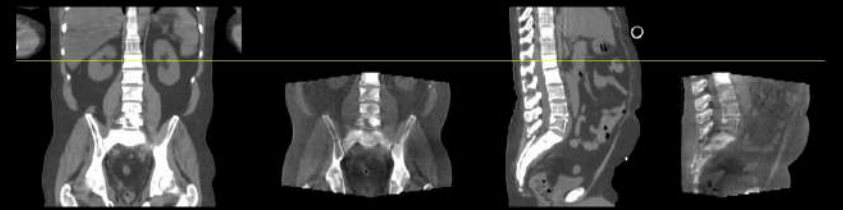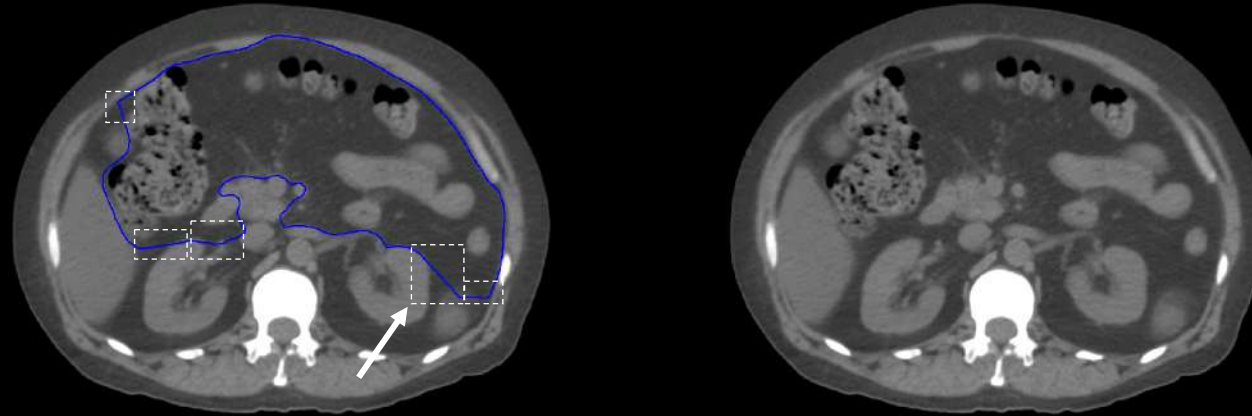

OD#5: straight line from the anterior-most aspect of the kidney (L) to the anterior-most aspect of the spleen

$T(y)=22.20$

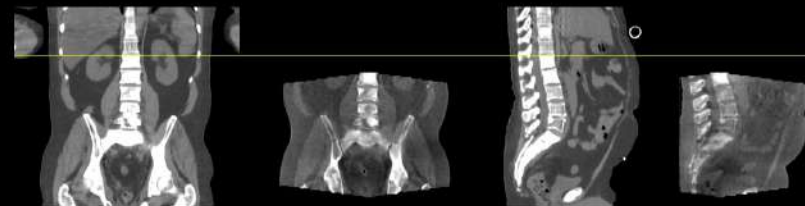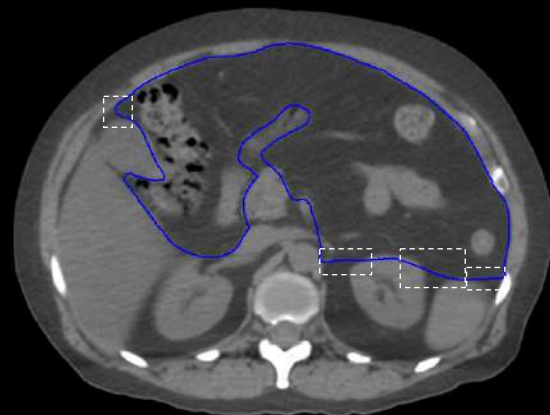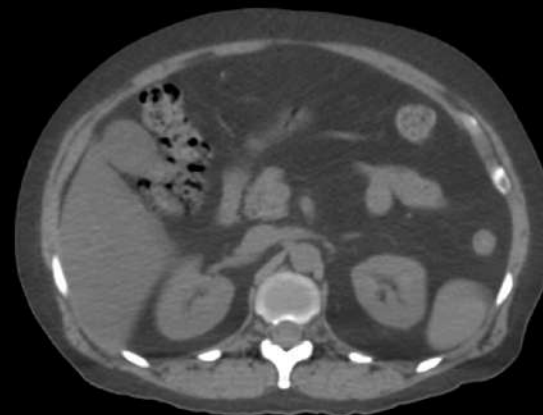

$T(y)=22.50$

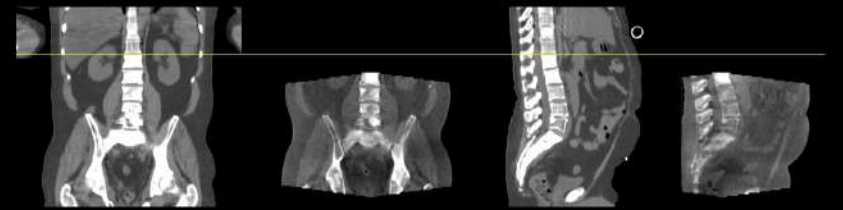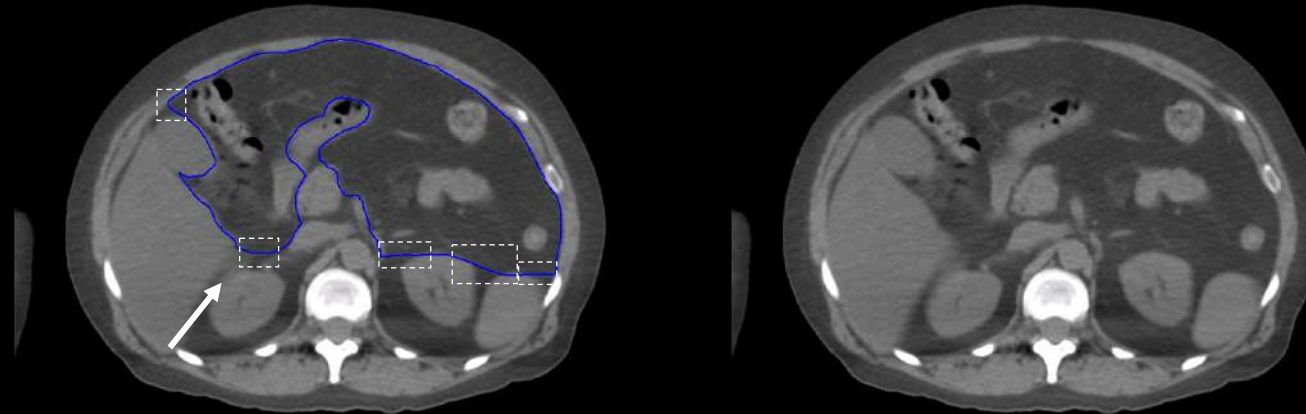

OD#8: straight line from the posterior medial-most aspect of the liver to the lateral-most aspect of the central vessels/IVC

$T(y)=23.40$

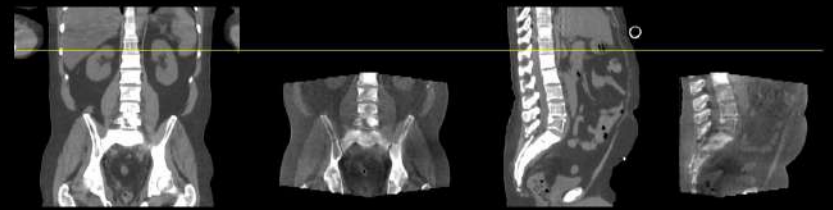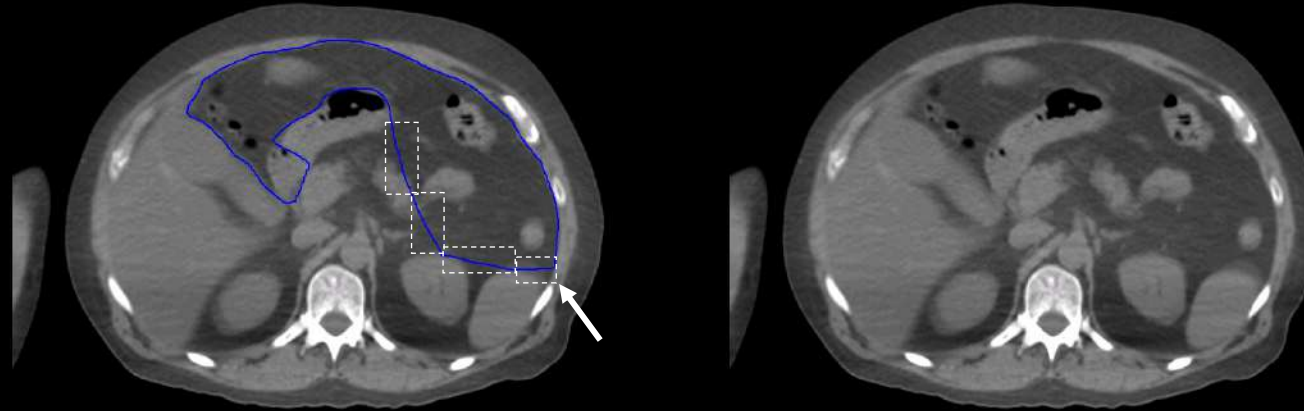

OD#11: lateral line from the anterior-most aspect of the spleen to intersect the transverse abdominis



T(y)=23.70

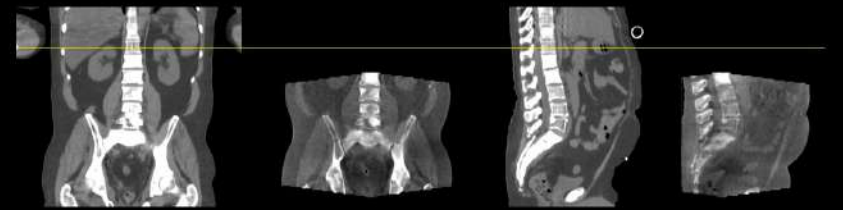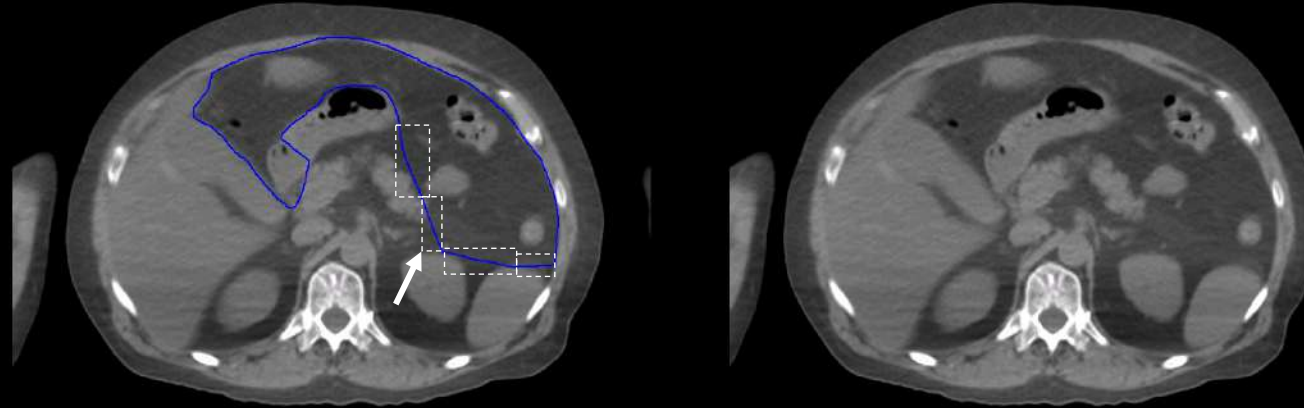

OD#6: straight line from the anterior-most aspect of the kidney (L) to the lateral-most aspect of the pancreas

T(y)=24.00

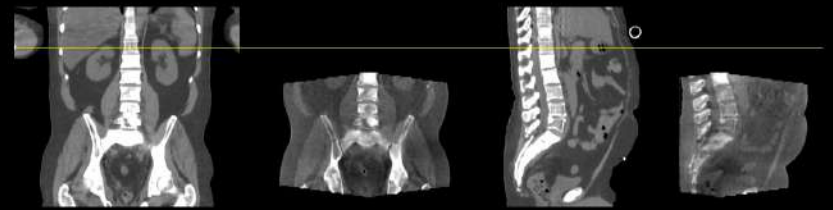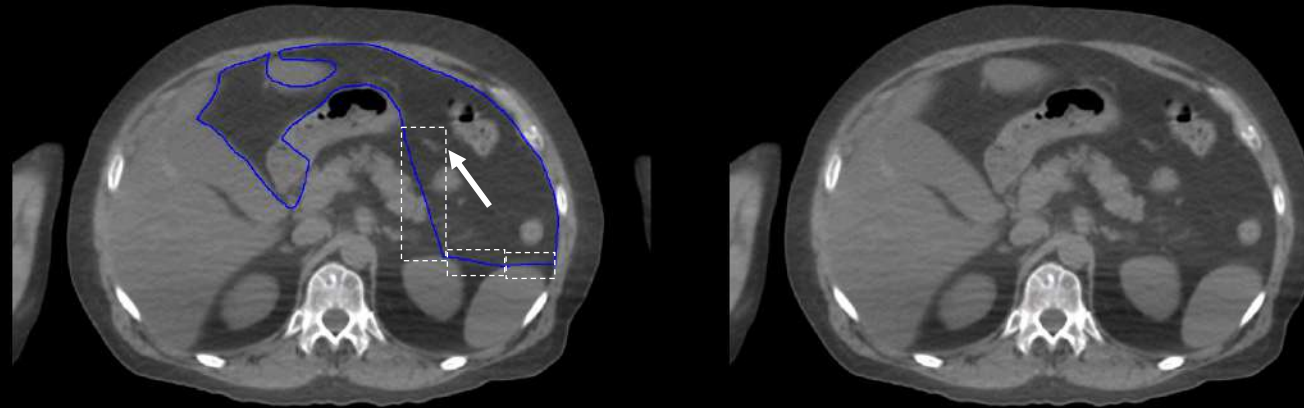

OD#7: straight line from the anterior-most aspect of the kidney (L) to the lateral-most aspect of the stomach

T(y)=24.90

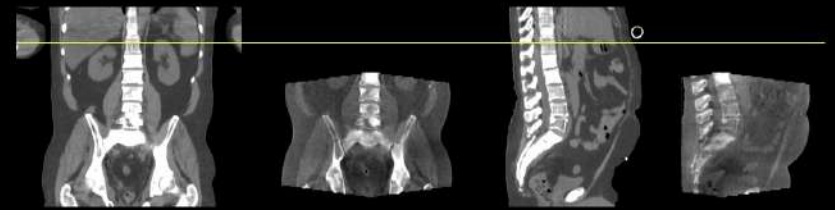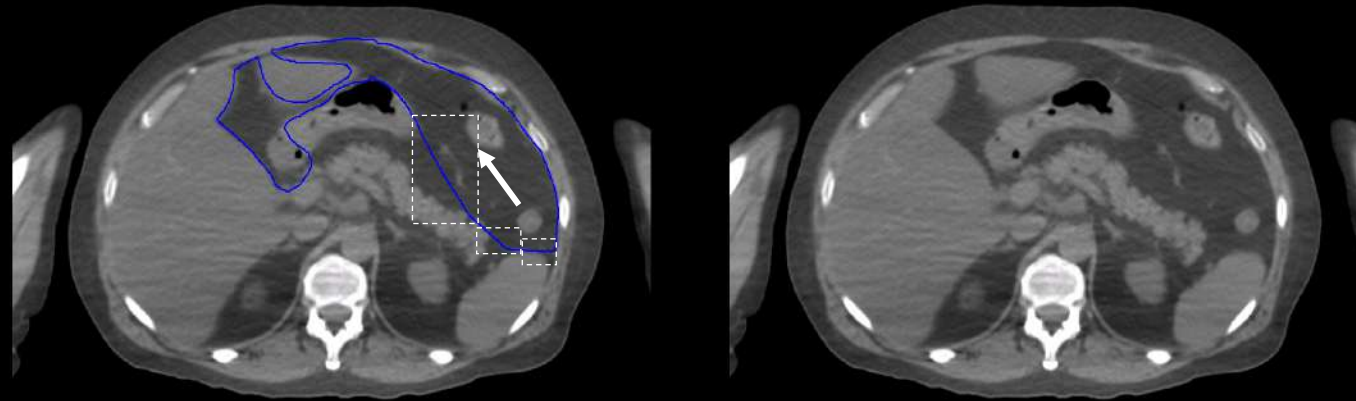

OD#15: straight line from the lateral-most (L) aspect of the stomach to the left lateral-most aspect of the pancreas

$T(y)=25.20$

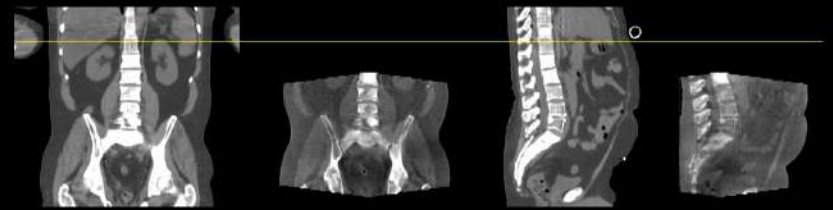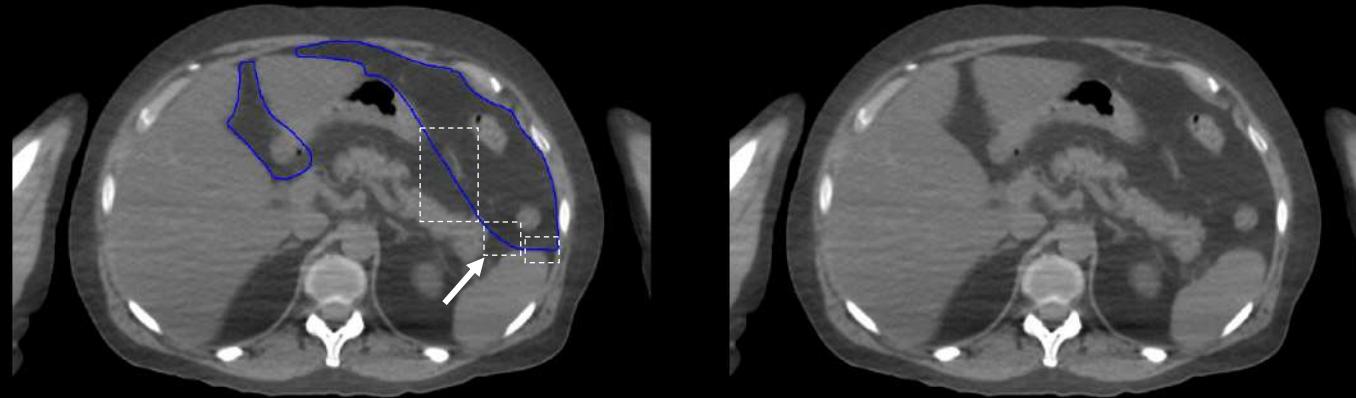

OD#12: straight line from the anterior-most aspect of the spleen to the lateral-most aspect of the pancreas

$T(y)=25.80$

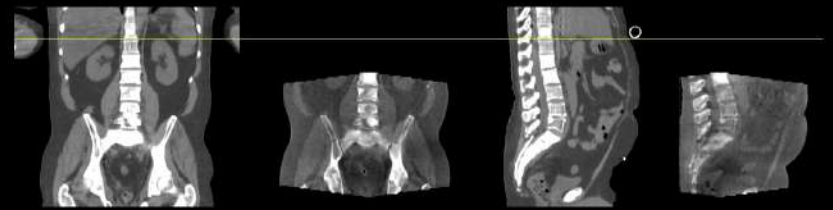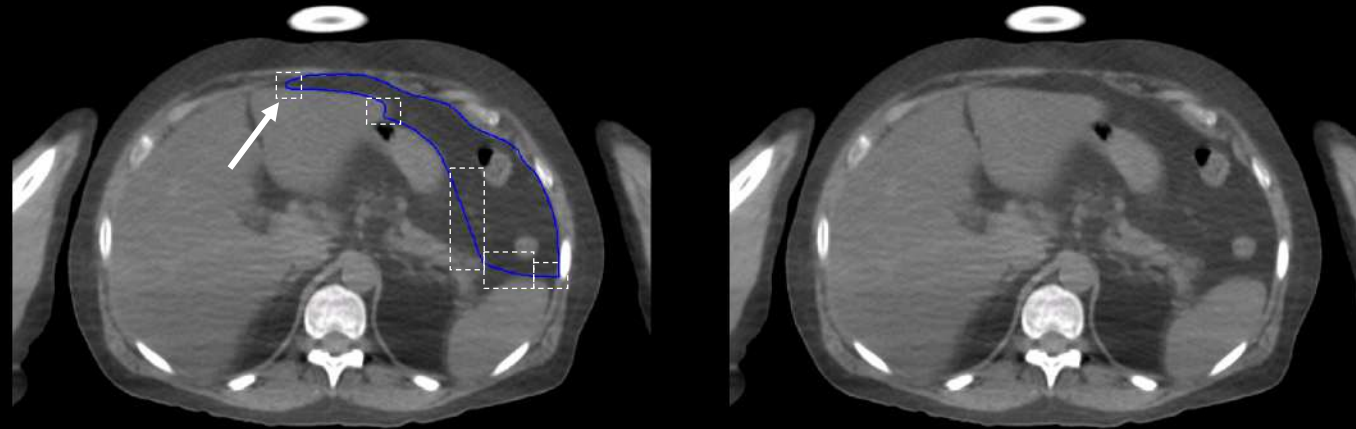

OD#10: minimum distance line from the anterior-most aspect of the liver to the rectus abdominis

T(y)=27.00

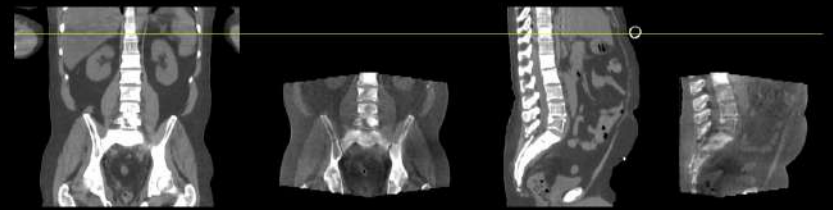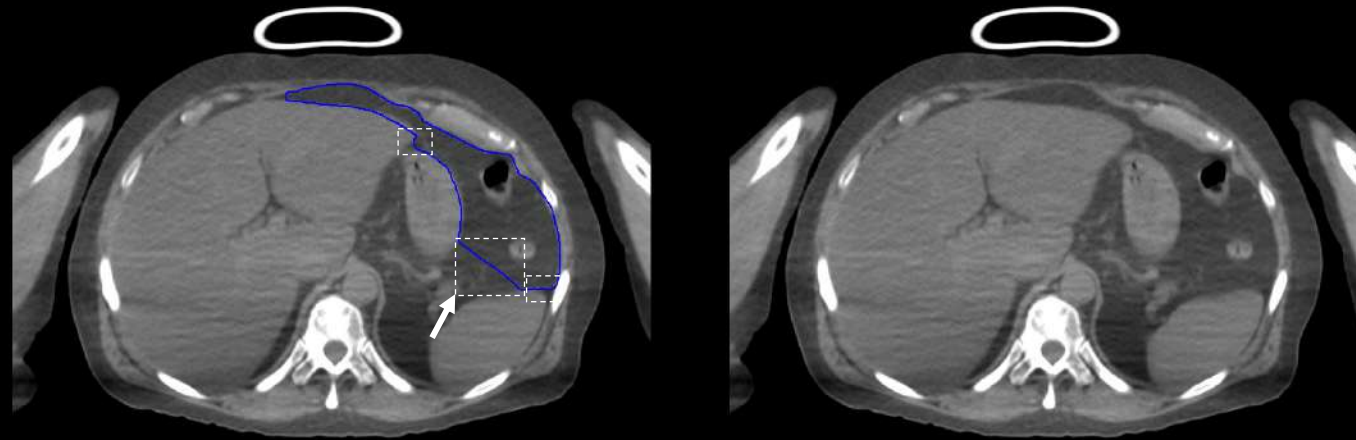

OD#13: straight line from the anterior-most aspect of the spleen to the lateral-most aspect of the stomach



$T(y)=27.90$

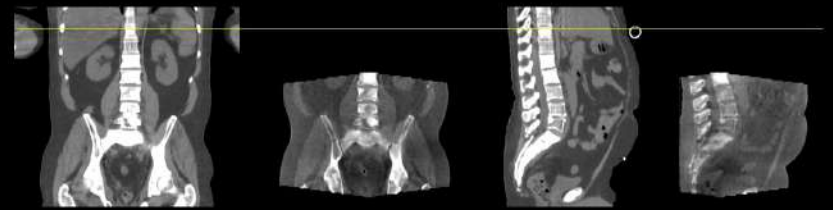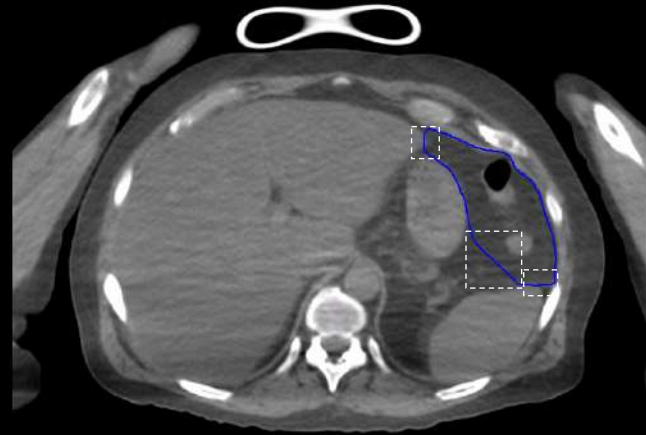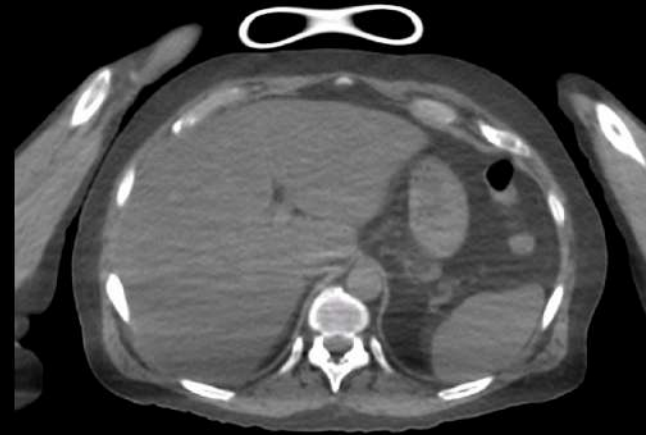

T(y)=29.10

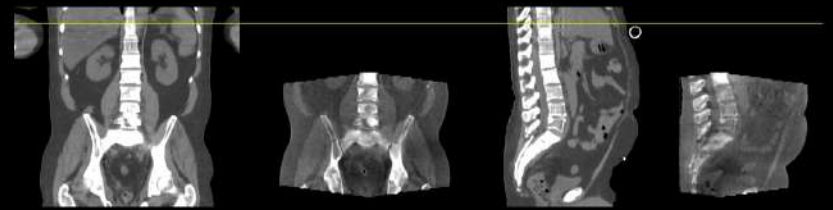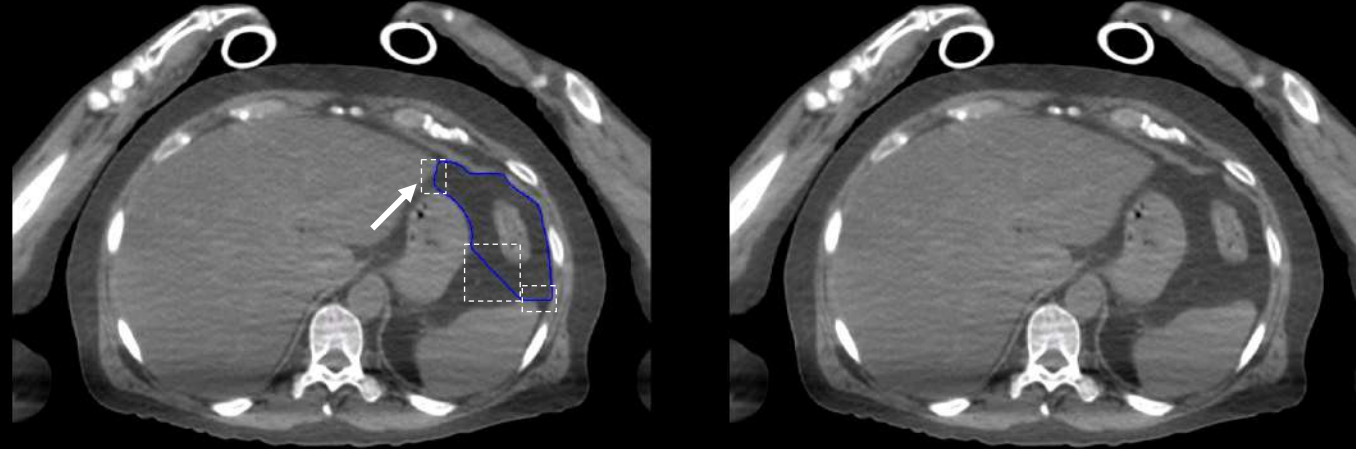

OD#14: straight line from the anterior-most aspect of the stomach to the left lateral-most aspect of the liver

T(y)=30.00

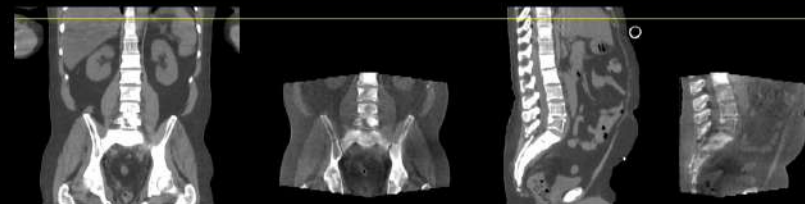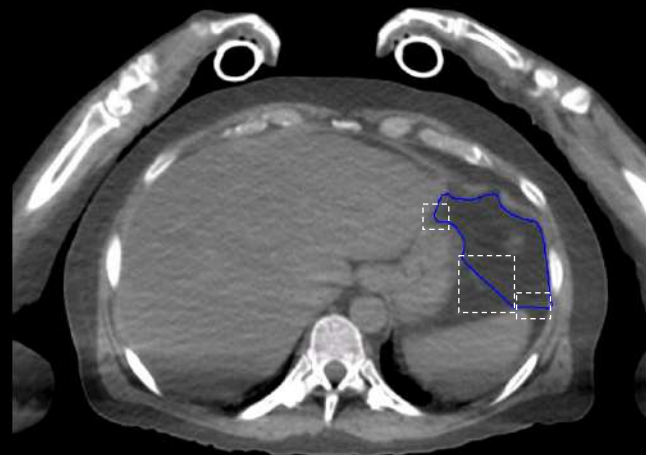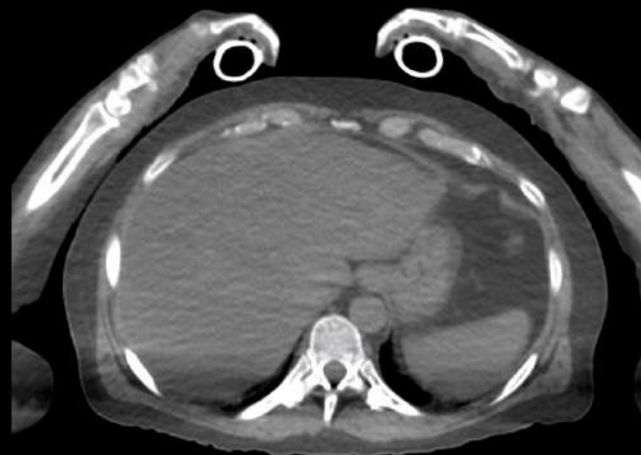

T(y)=30.30

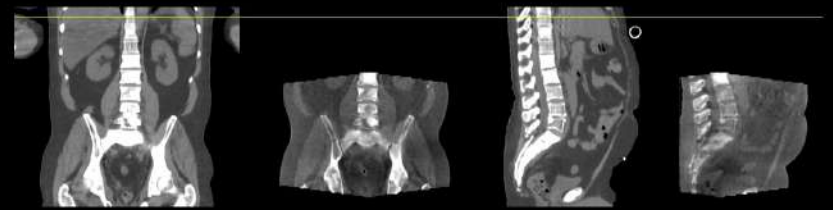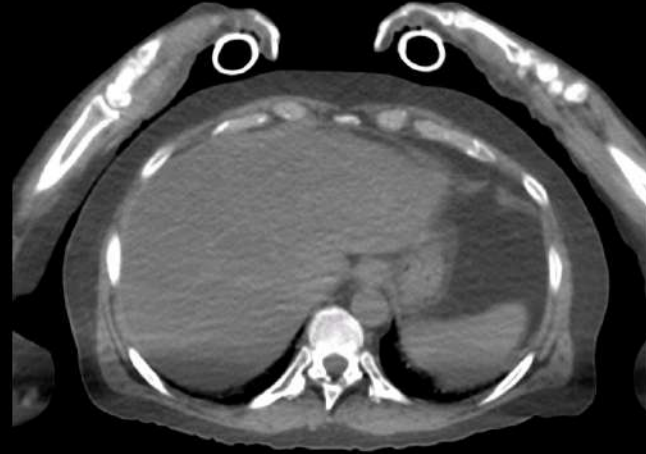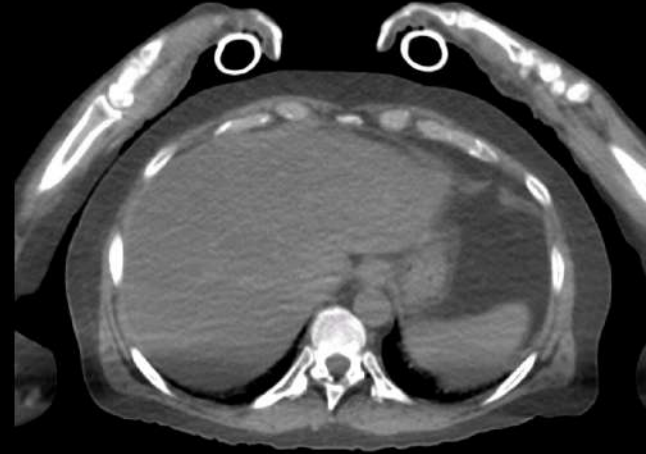

# Upper Abdominal

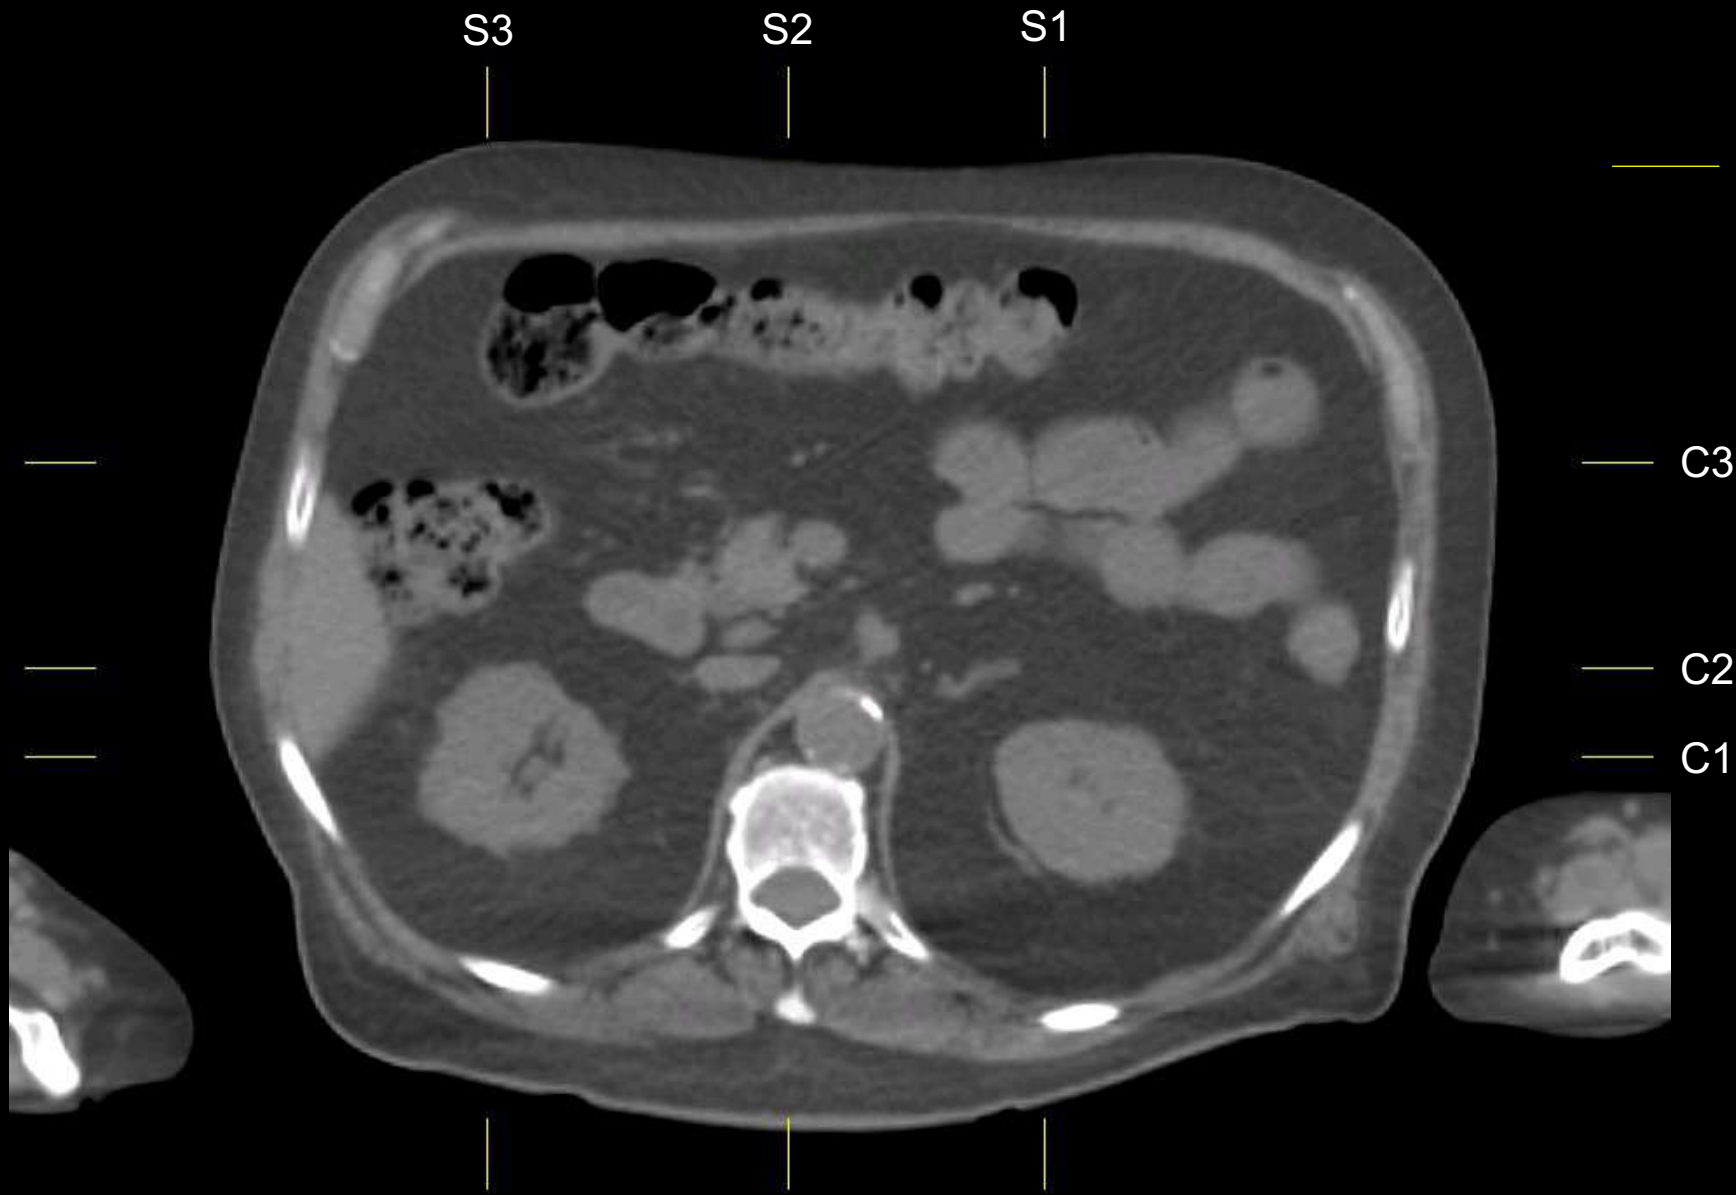

Slices included in the atlas

C3

C2

C1



C1 C2 C3

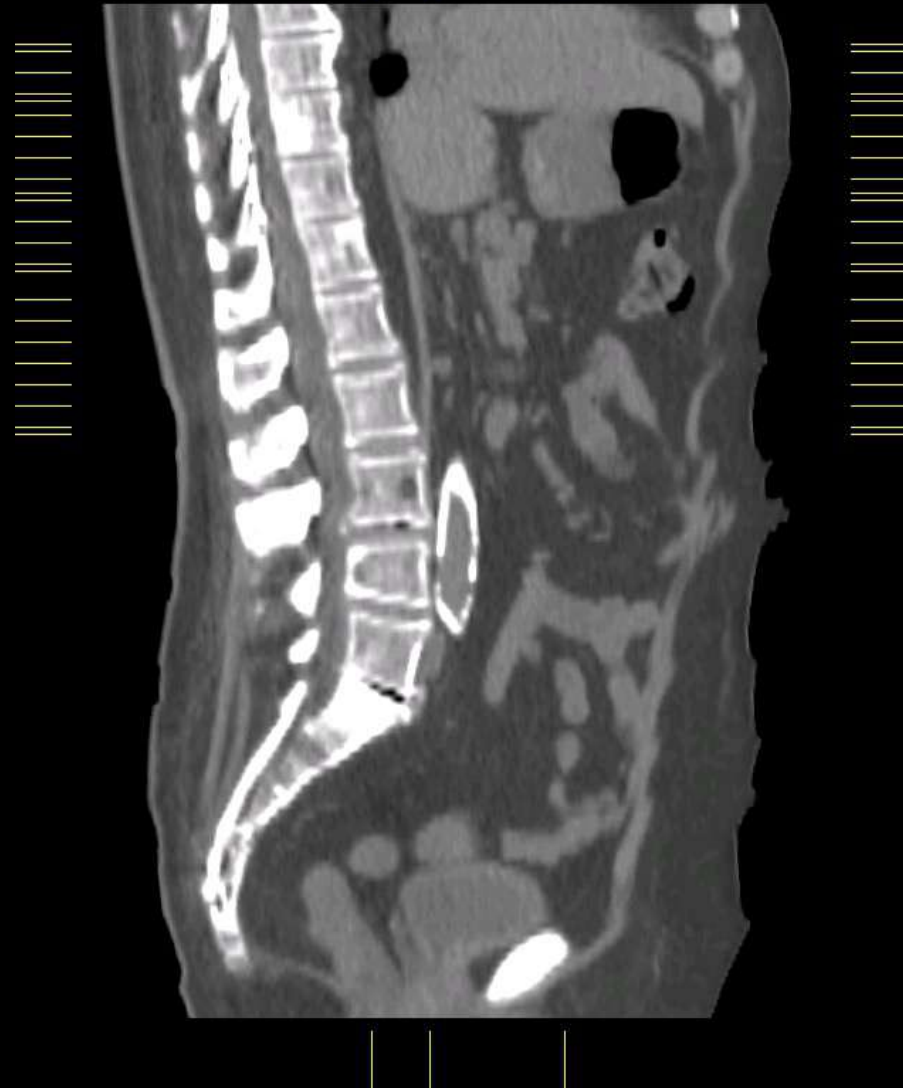

— Slices included in the atlas

S3

S2

S1

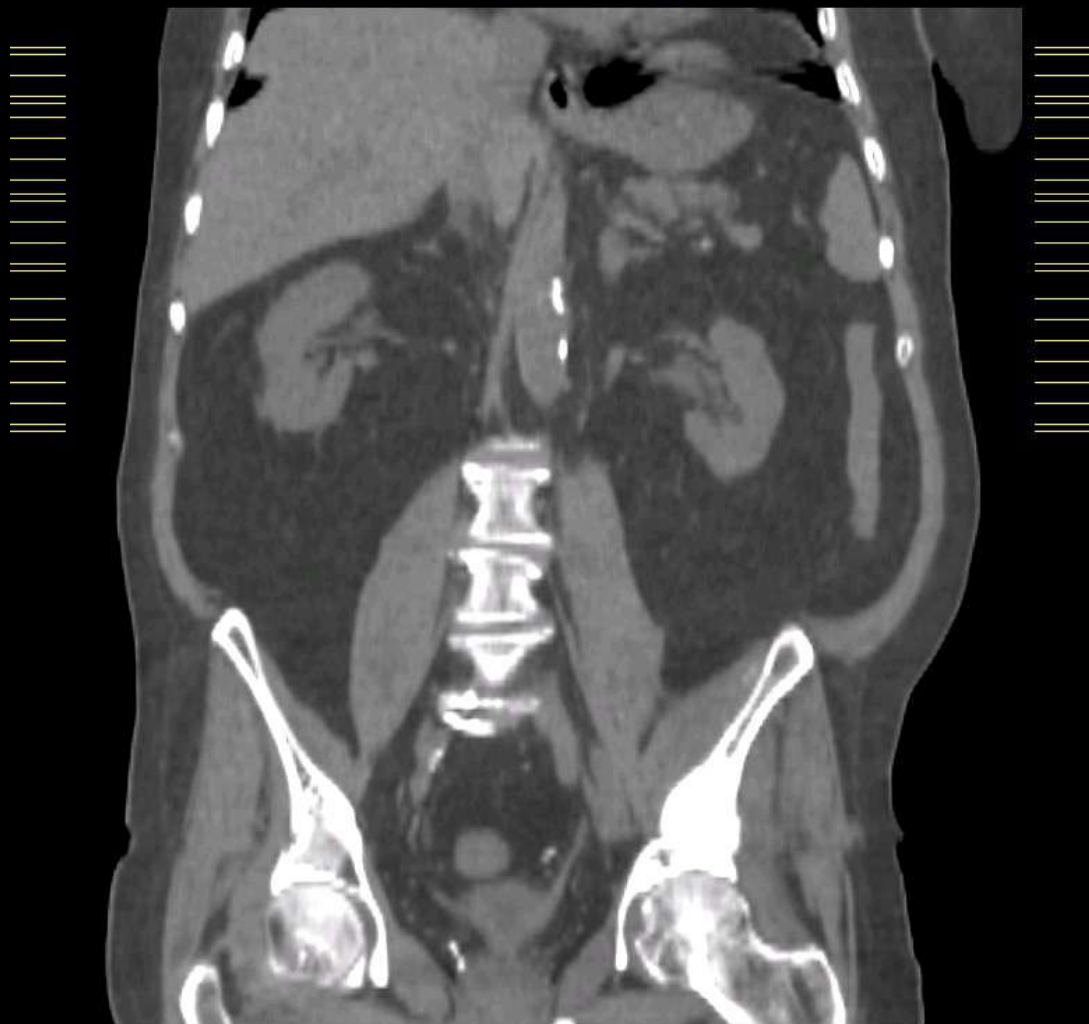

— Slices included in the atlas

C1

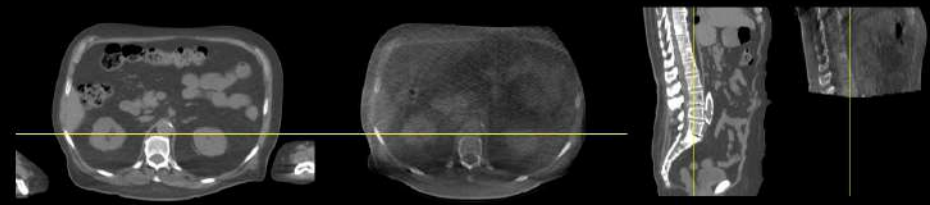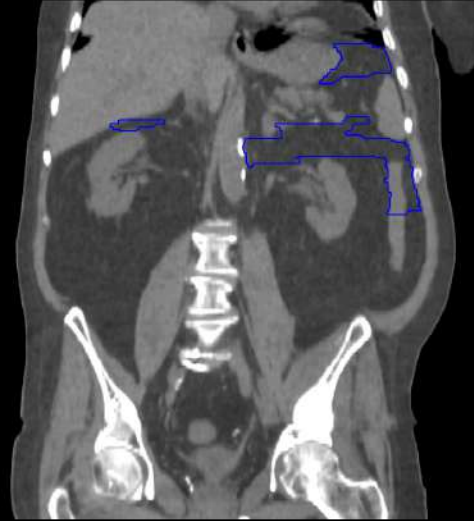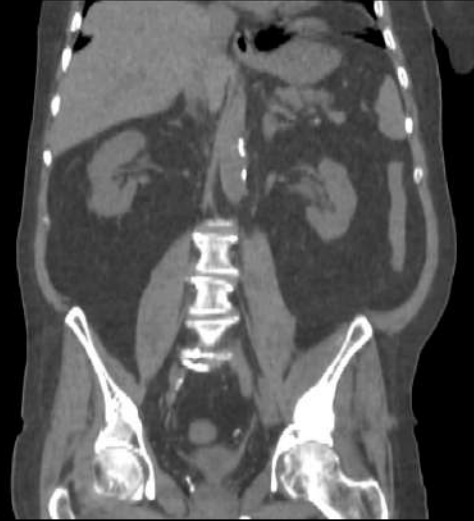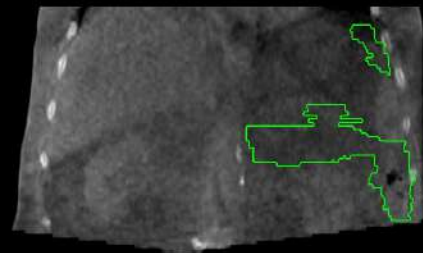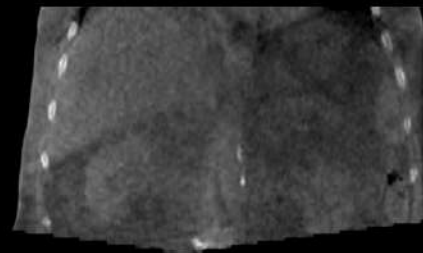

C2

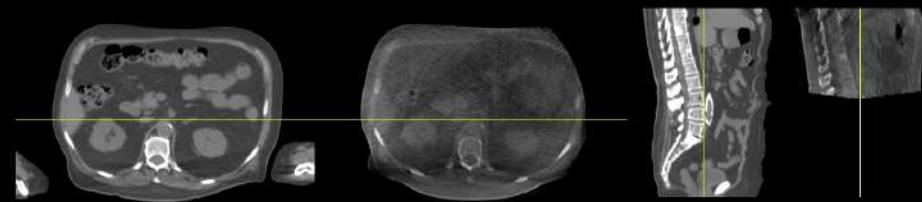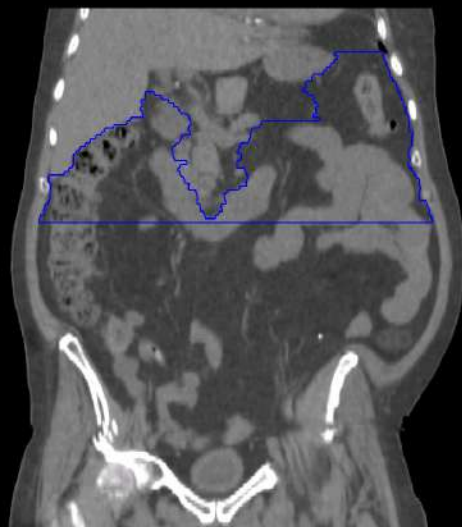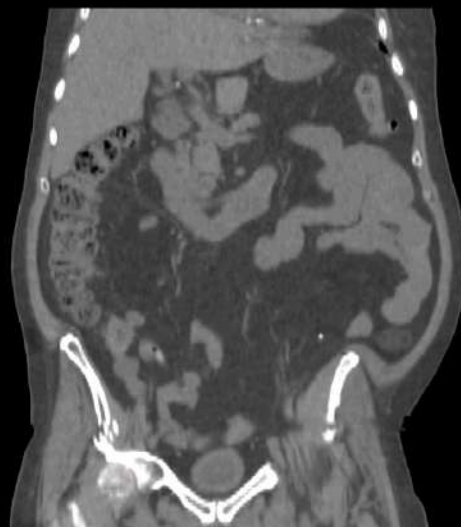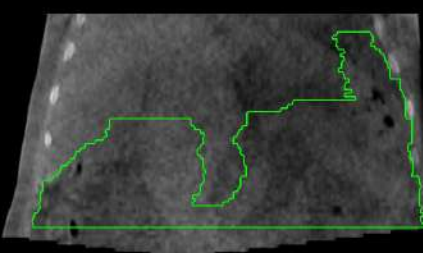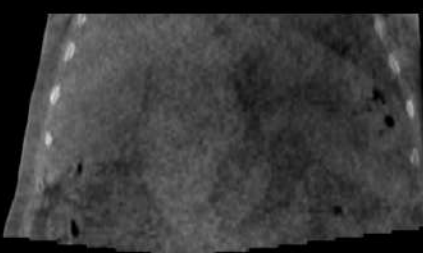

C3

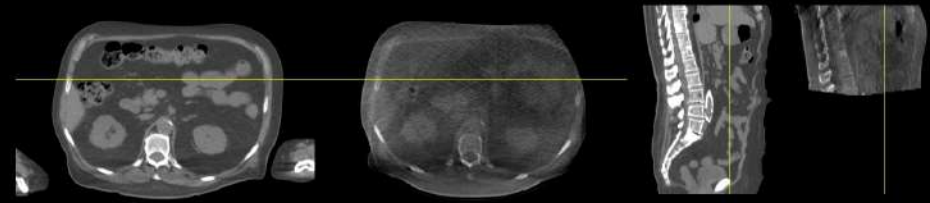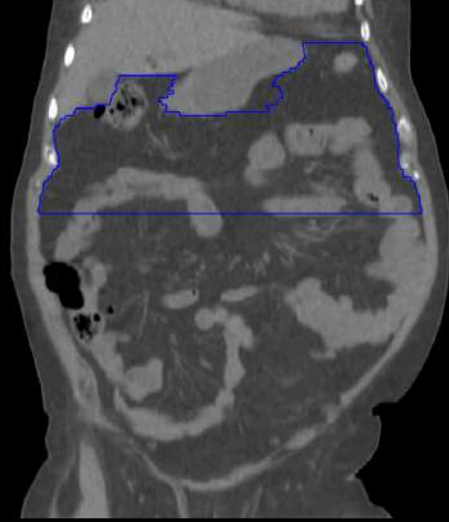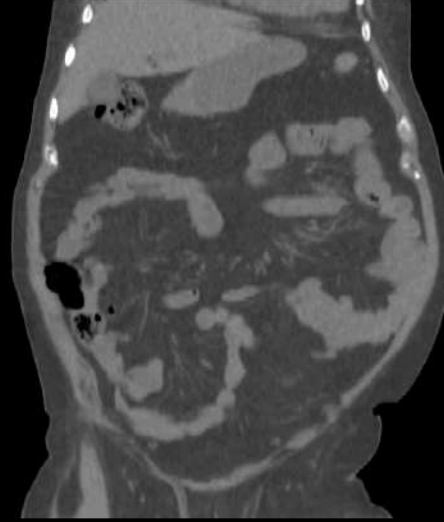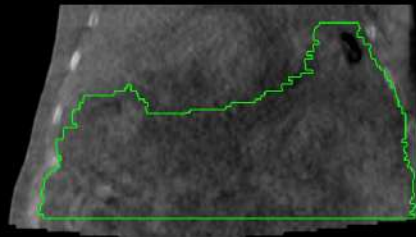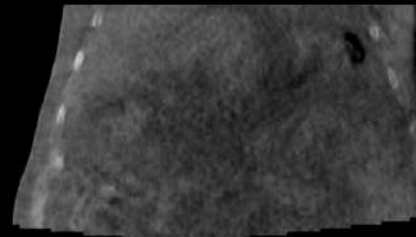

S1

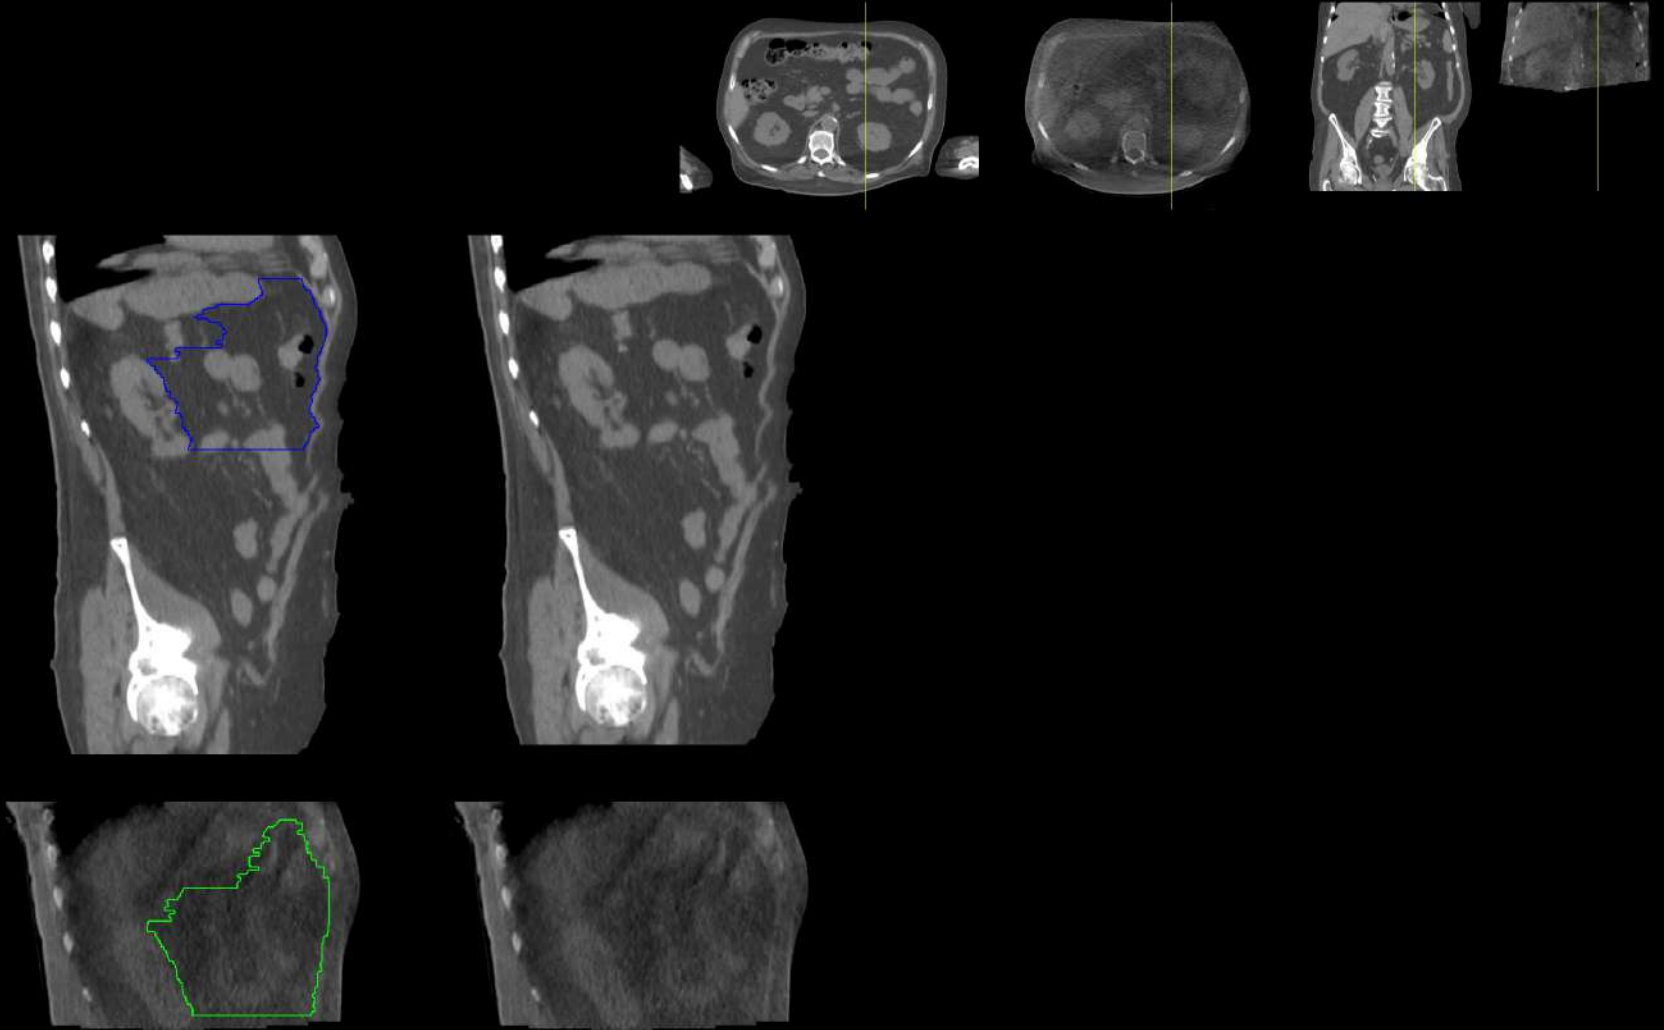



S2

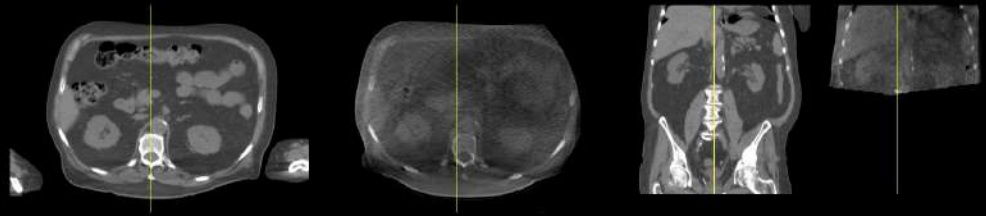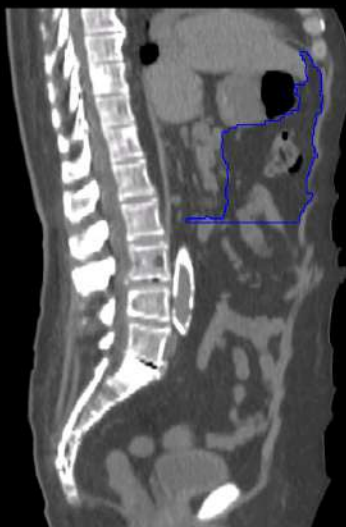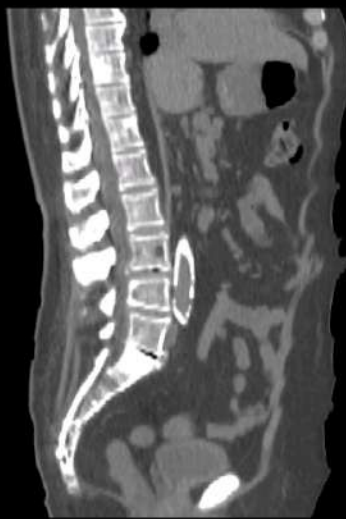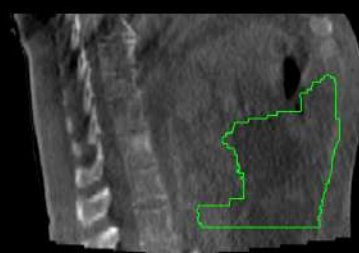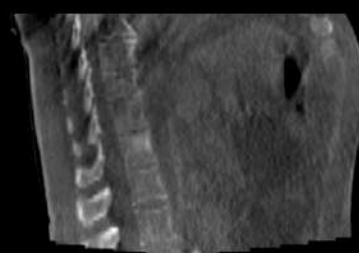

S3

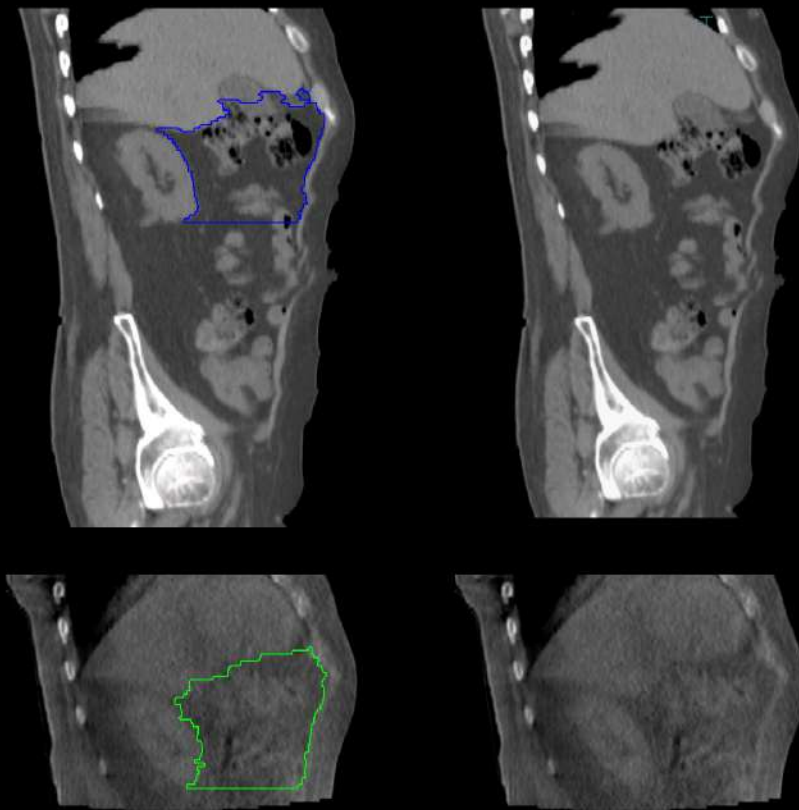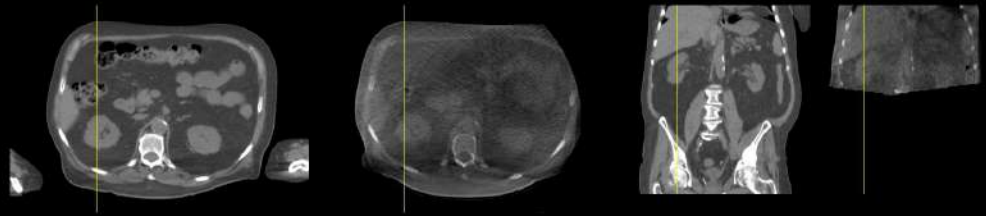

T(y)=-10.50

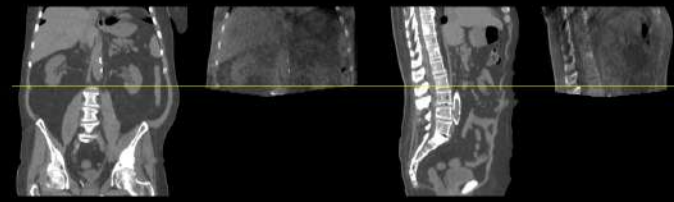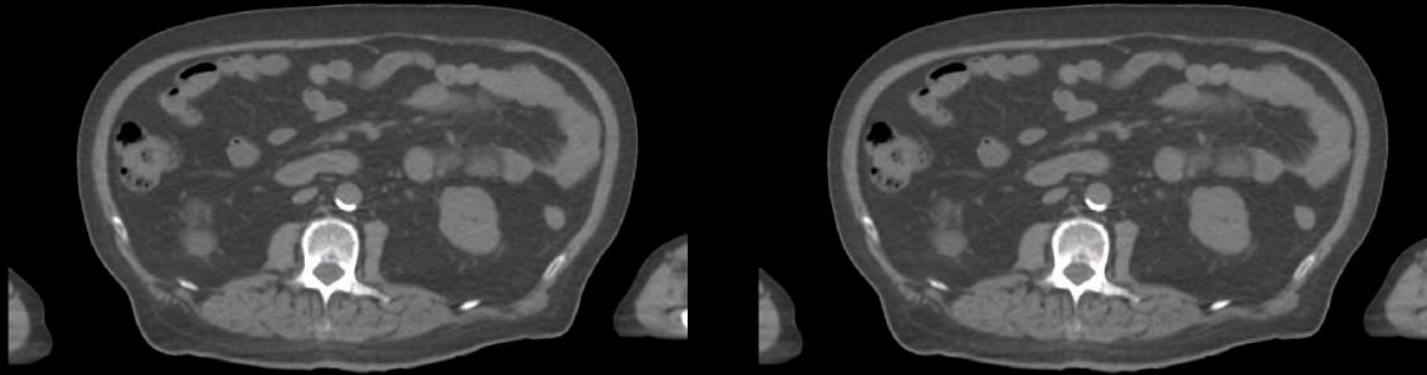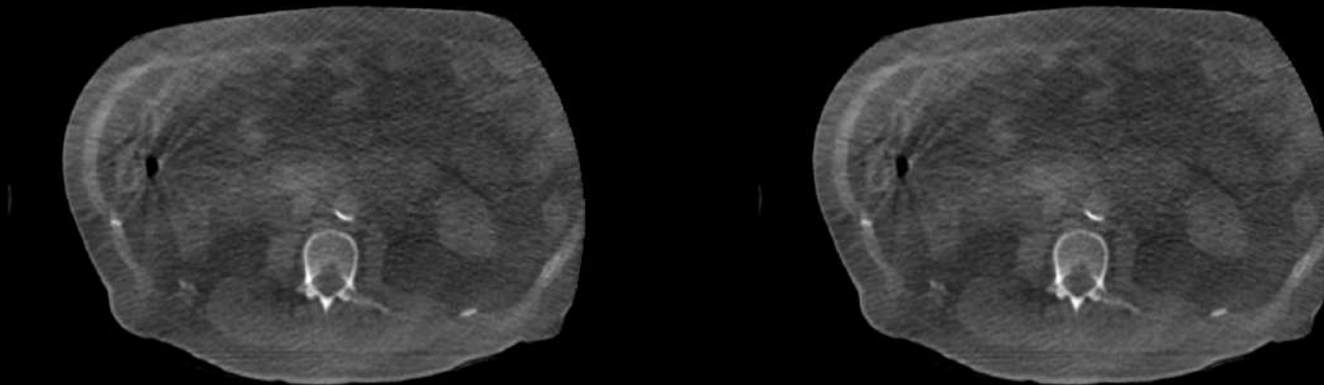

$T(y)=-10.20$

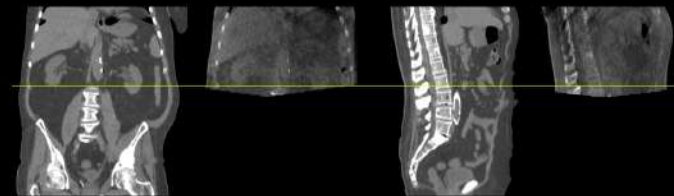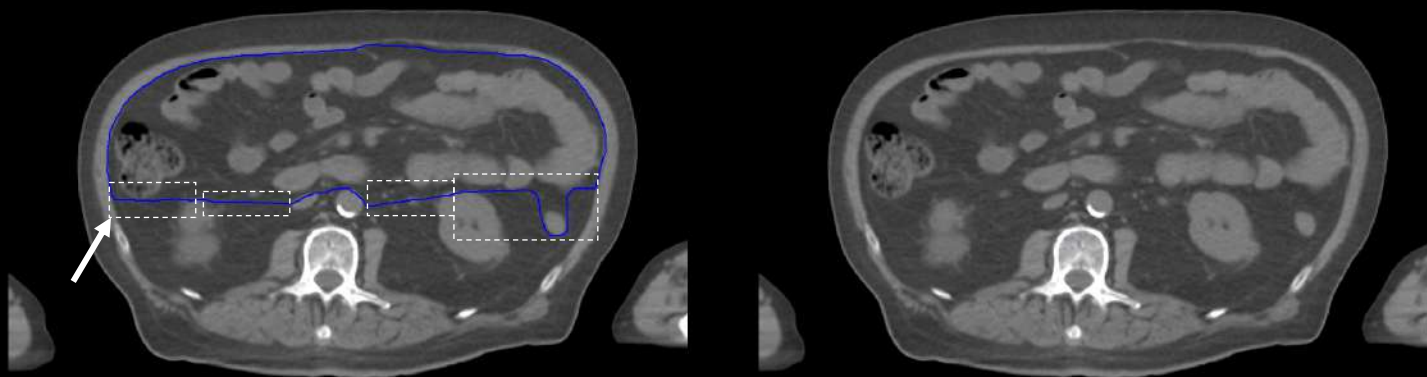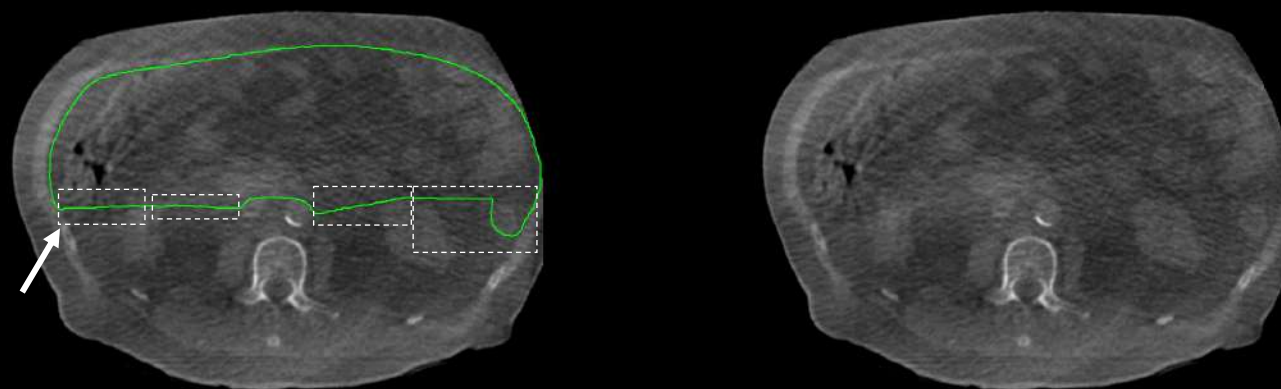

OD#2: straight line from the anterior-most aspect of the kidney to intersect the transverse abdominis

T(y)=-9.30

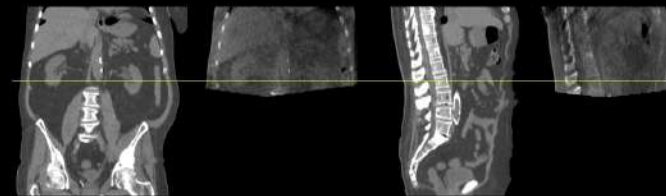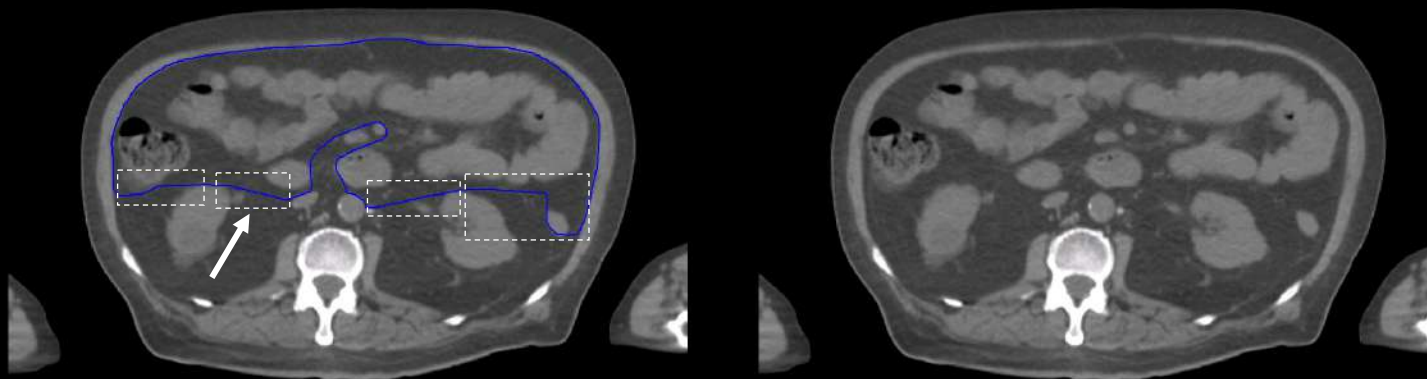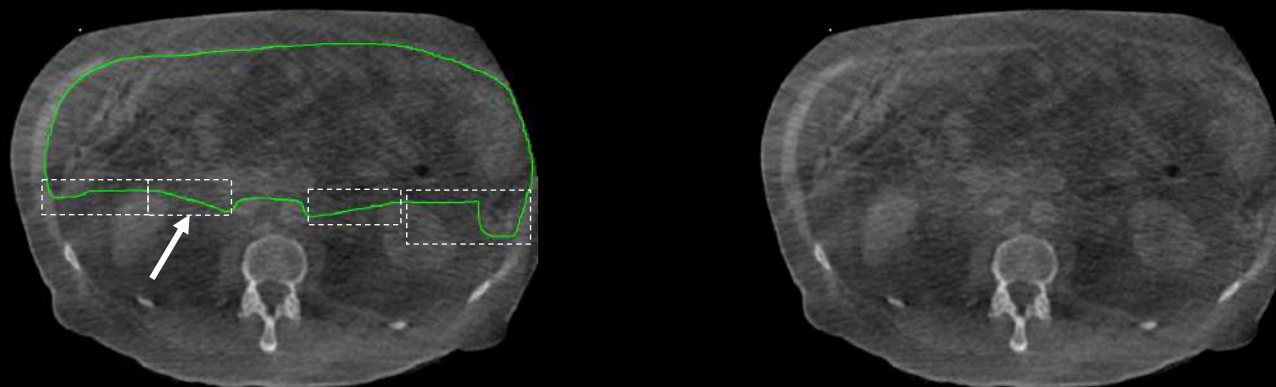

OD#3: straight line from the anterior-most aspect of the kidney to the lateral-most aspect of the central vessel/aorta/IVC



$T(y)=-8.40$

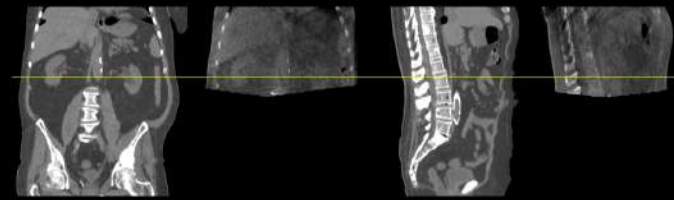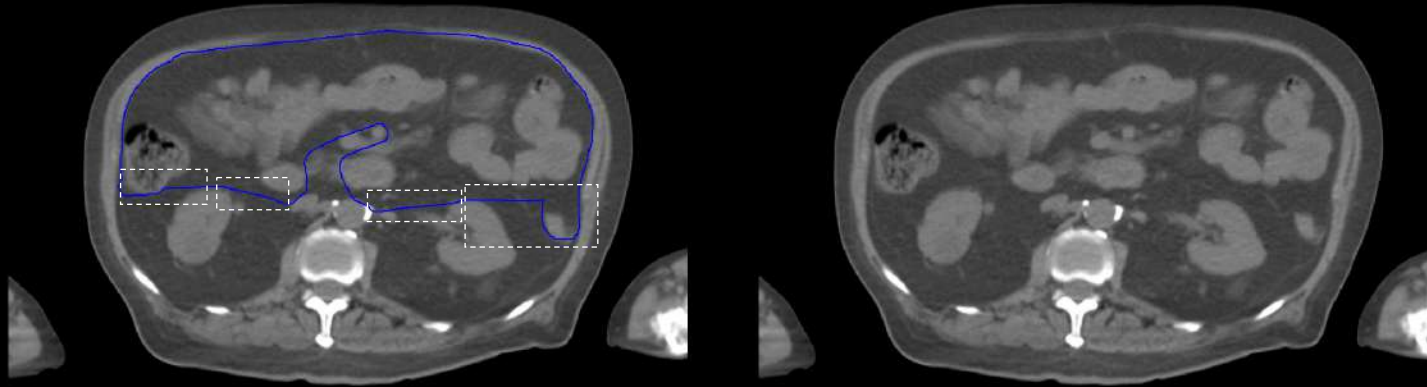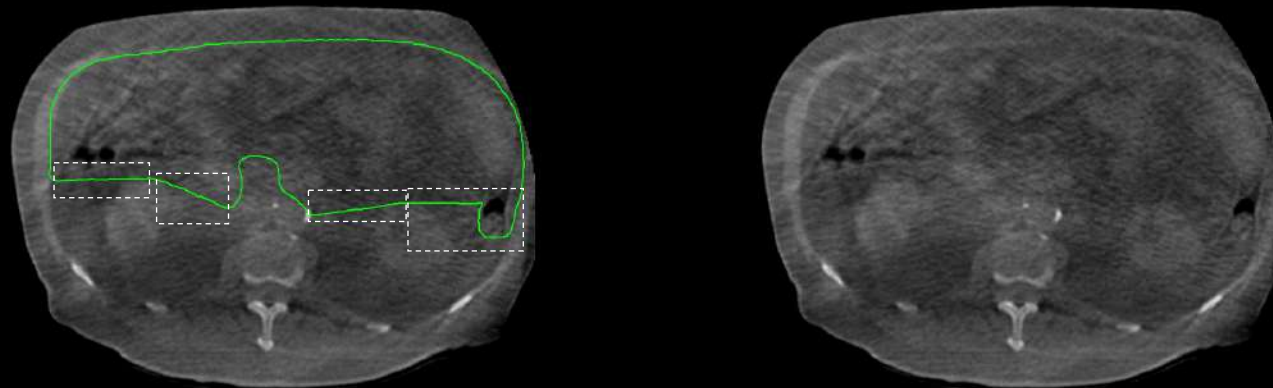



$T(y)=-7.50$

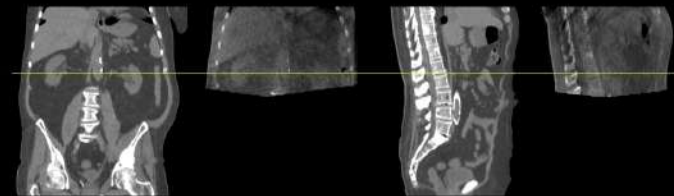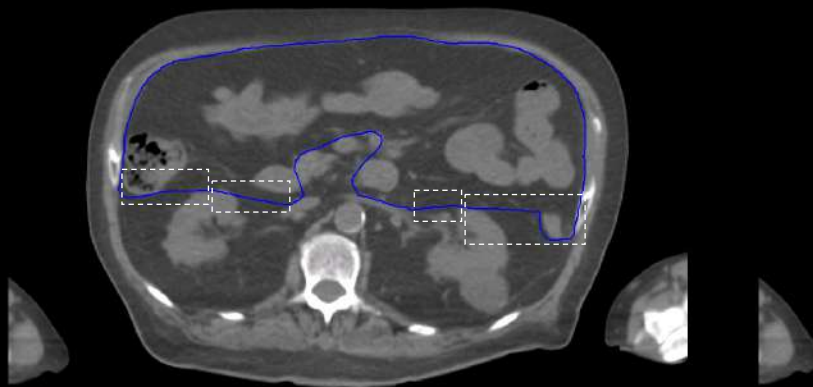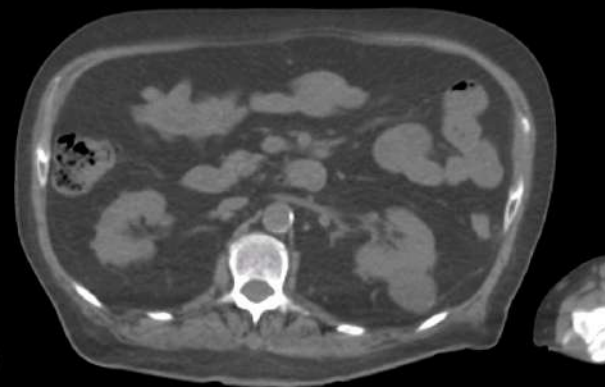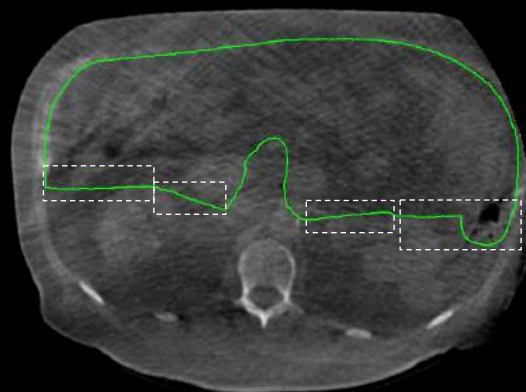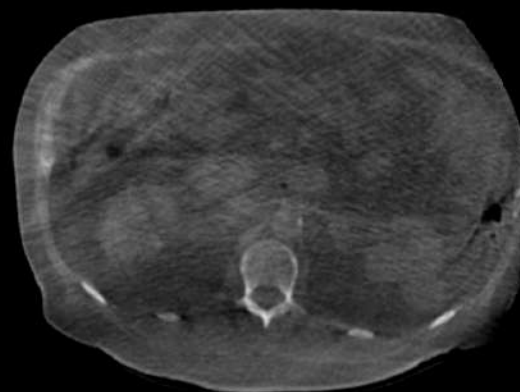

$T(y)=-6.60$

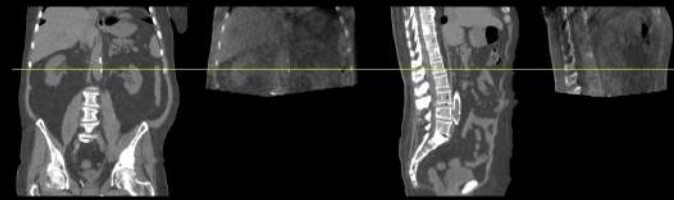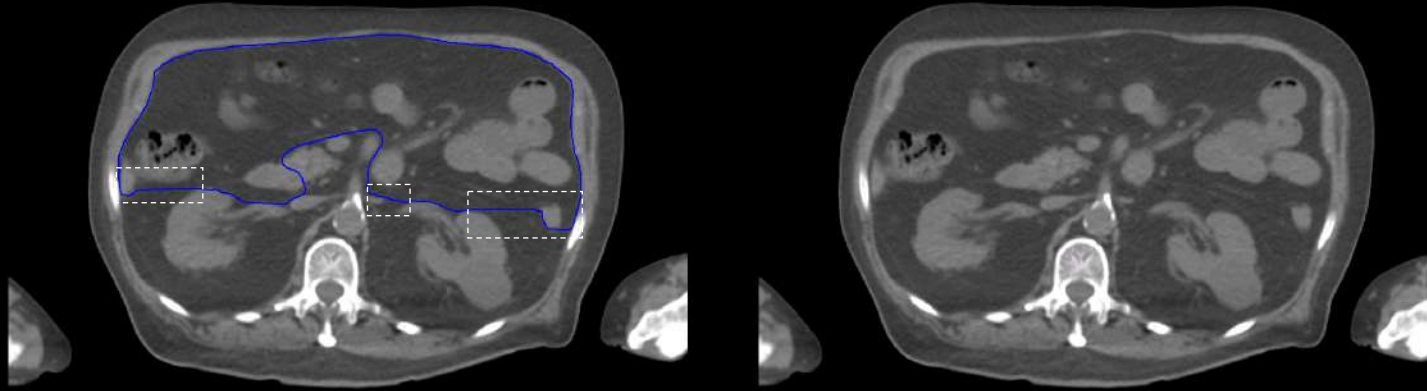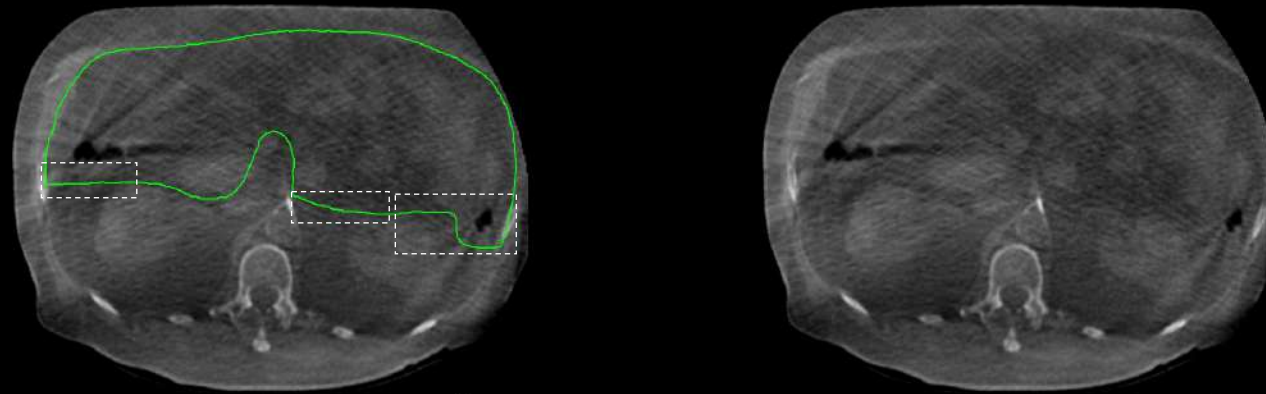

T(y)=-5.70

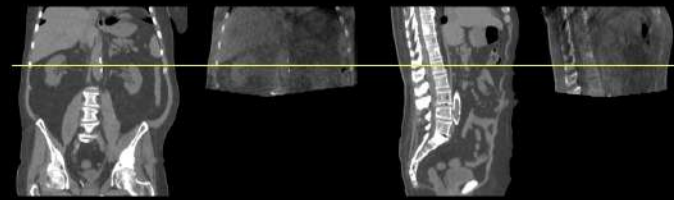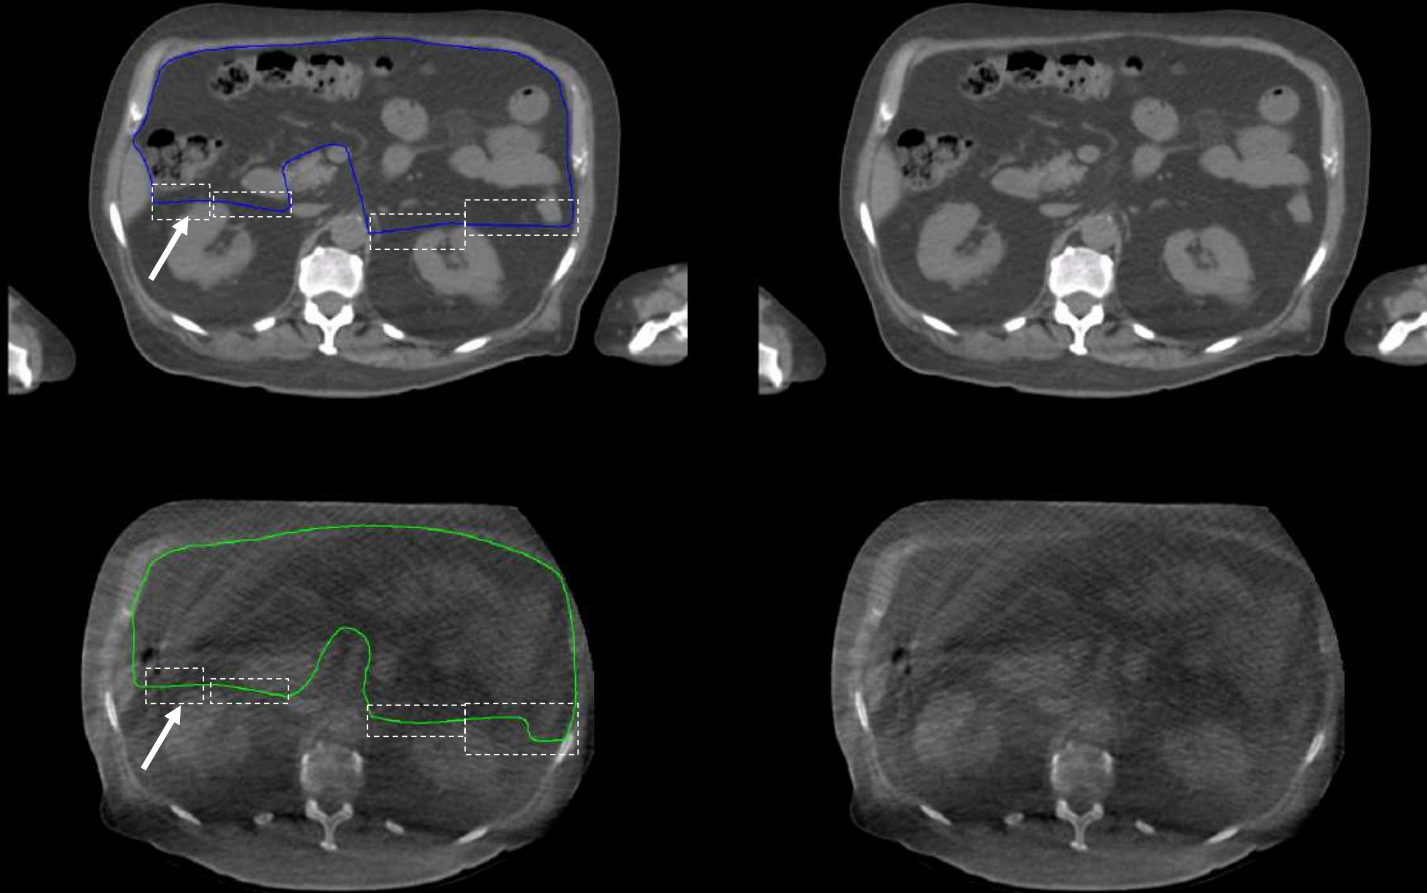

OD#4: lateral (R) line from the anterior-most aspect of the kidney to the liver

$T(y)=-4.80$

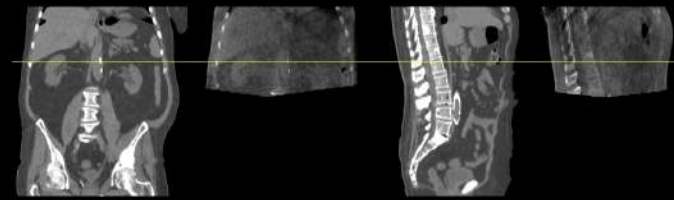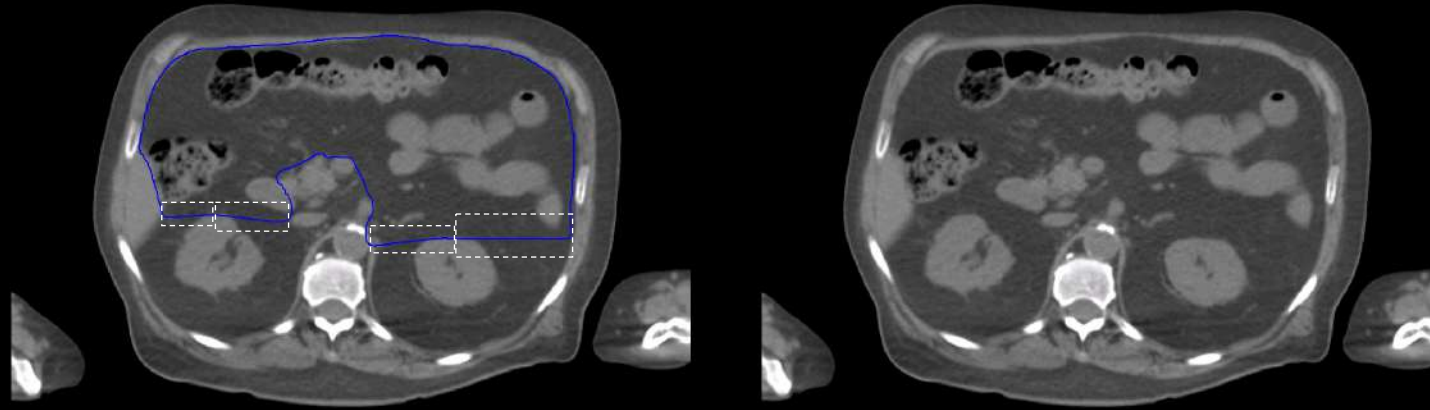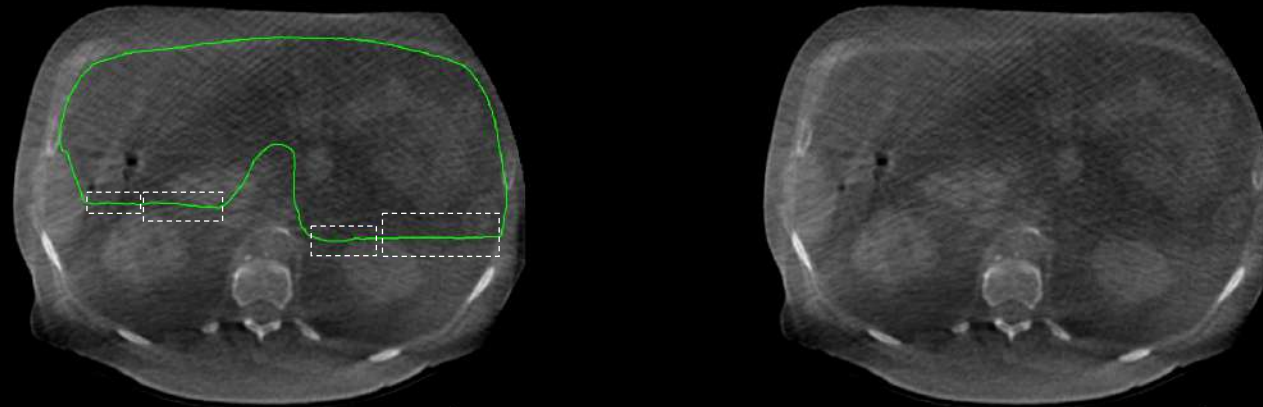

T(y)=-3.60

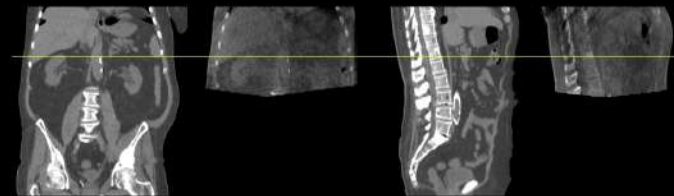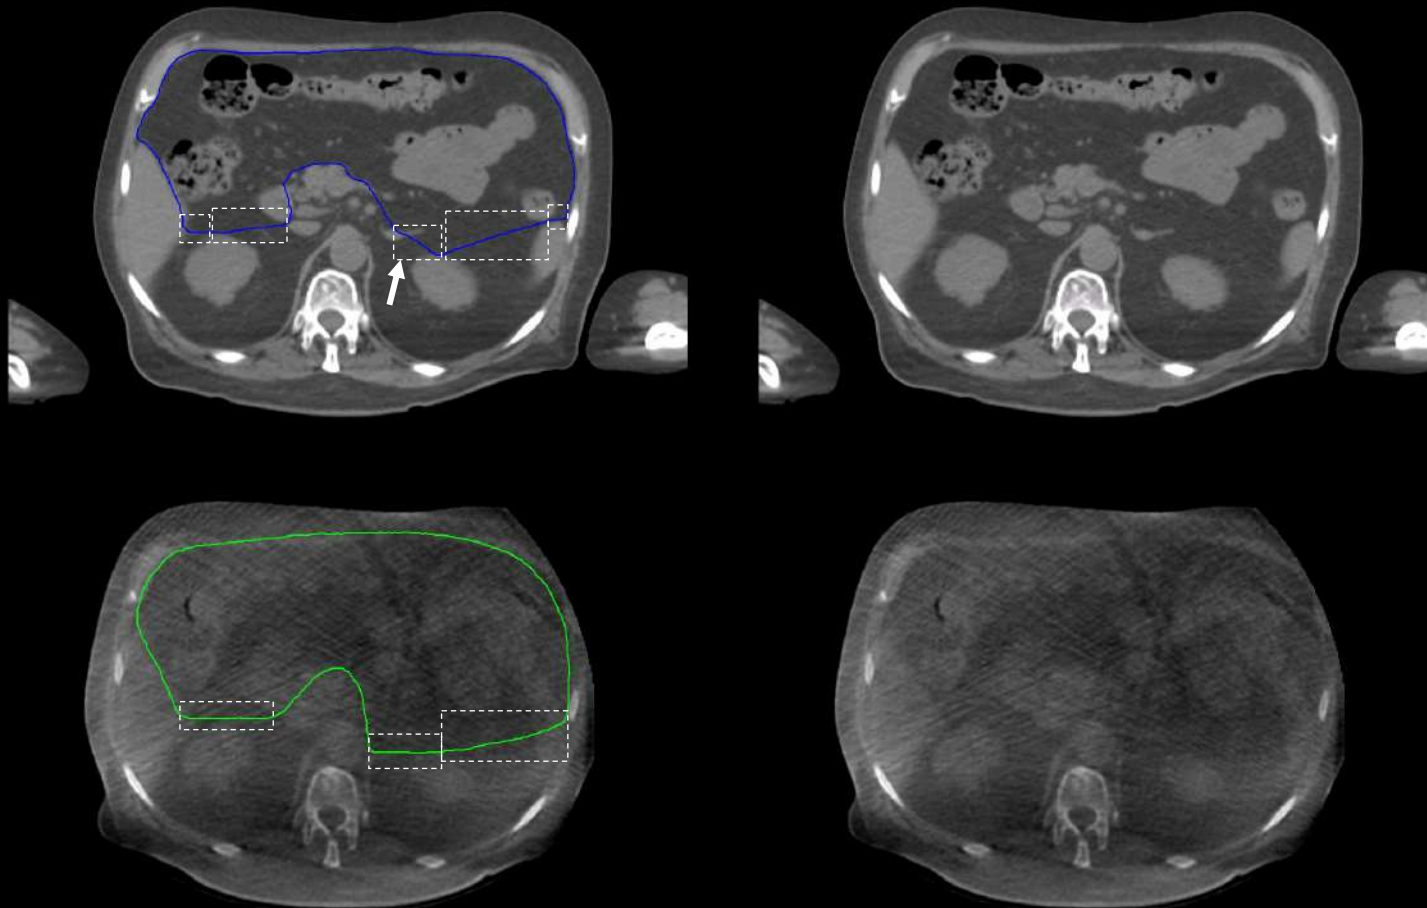

OD#6: straight line from the anterior-most aspect of the kidney (L) to the lateral-most aspect of the pancreas



T(y)=-3.30

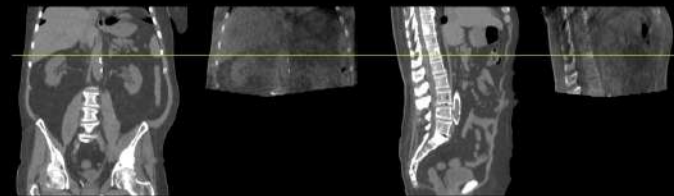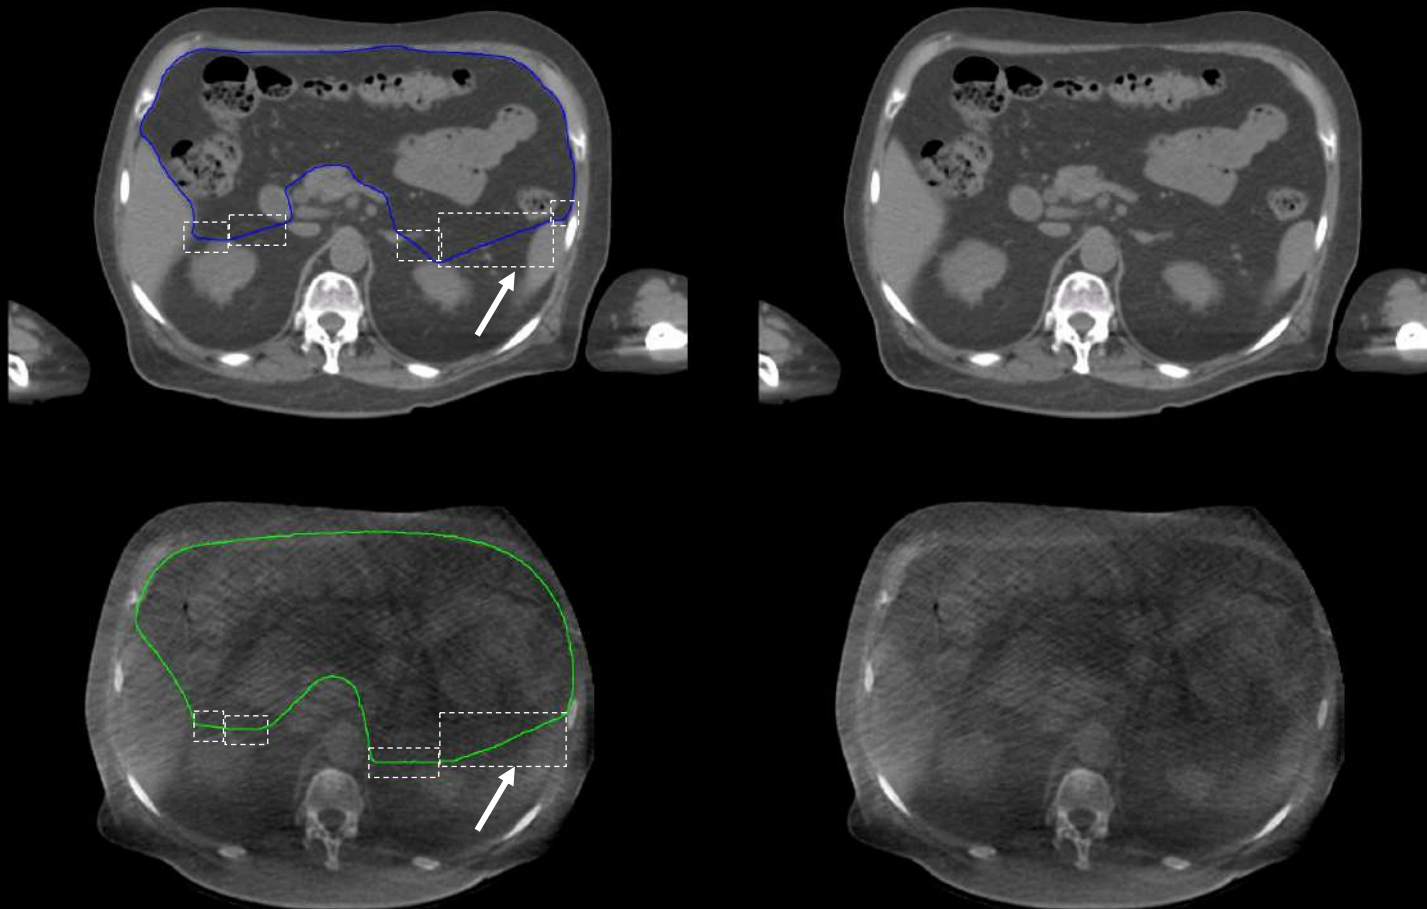

OD#5: straight line from the anterior-most aspect of the kidney (L) to the anterior-most aspect of the spleen



T(y)=-2.40

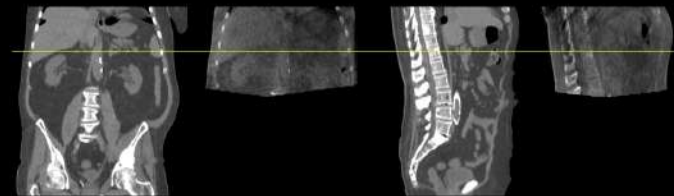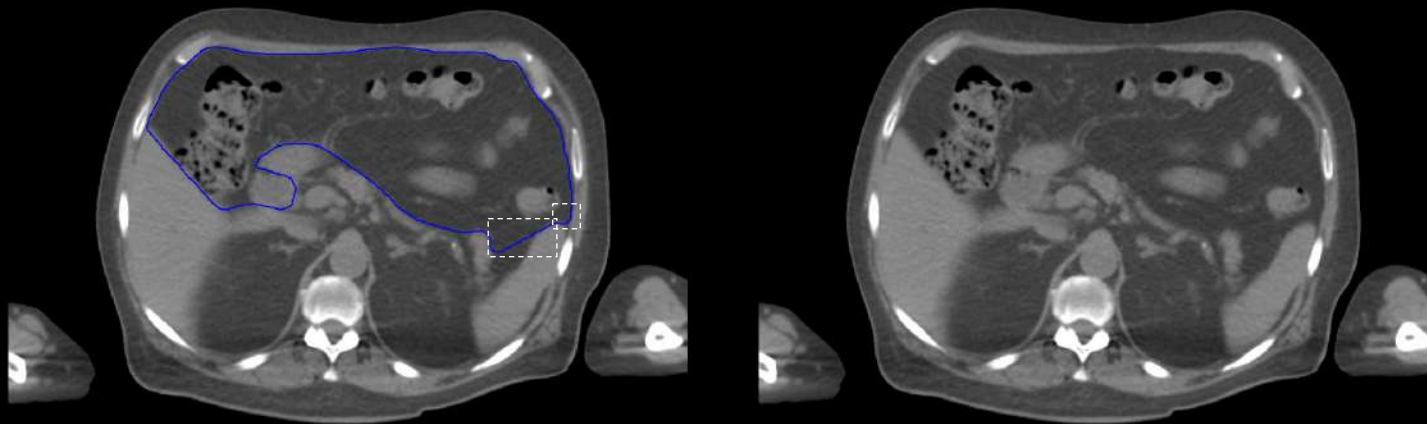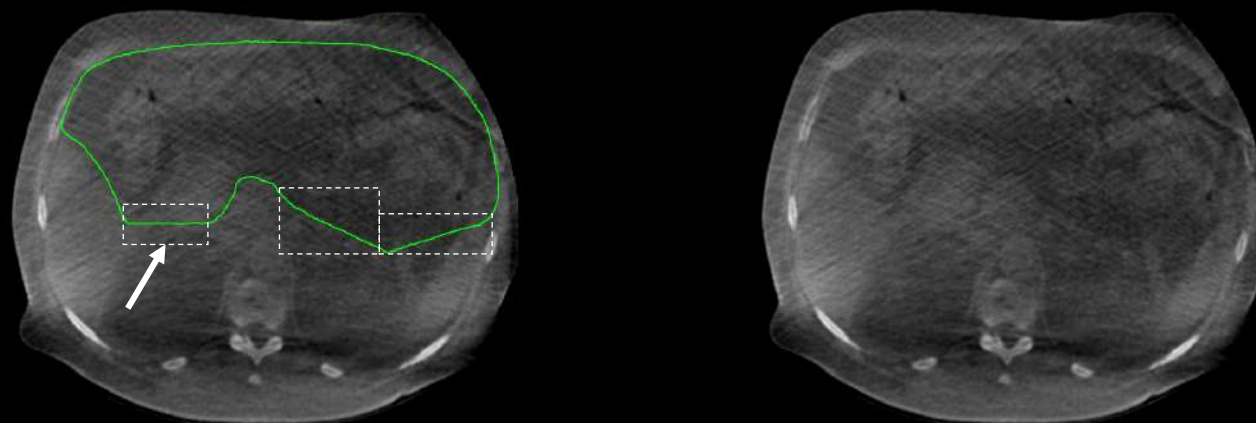

OD#8: straight line from the posterior medial-most aspect of the liver to the lateral-most aspect of the central vessels/IVC

$T(y)=-1.50$

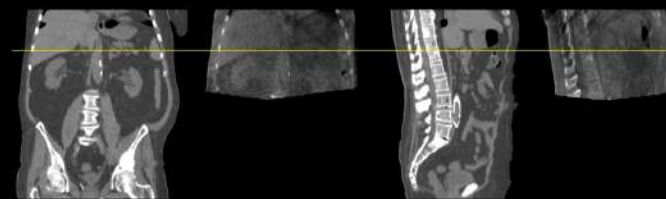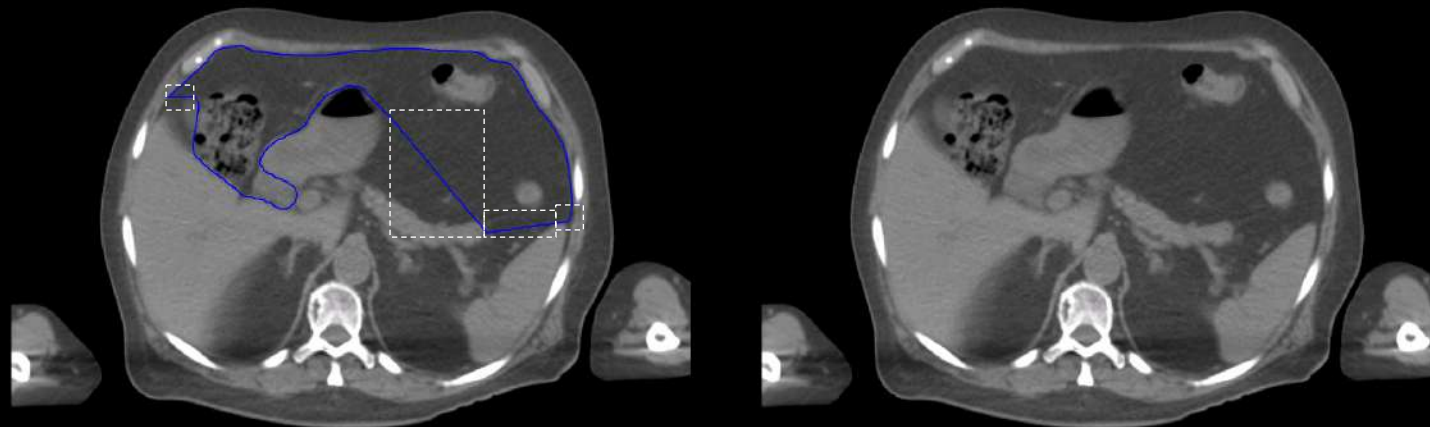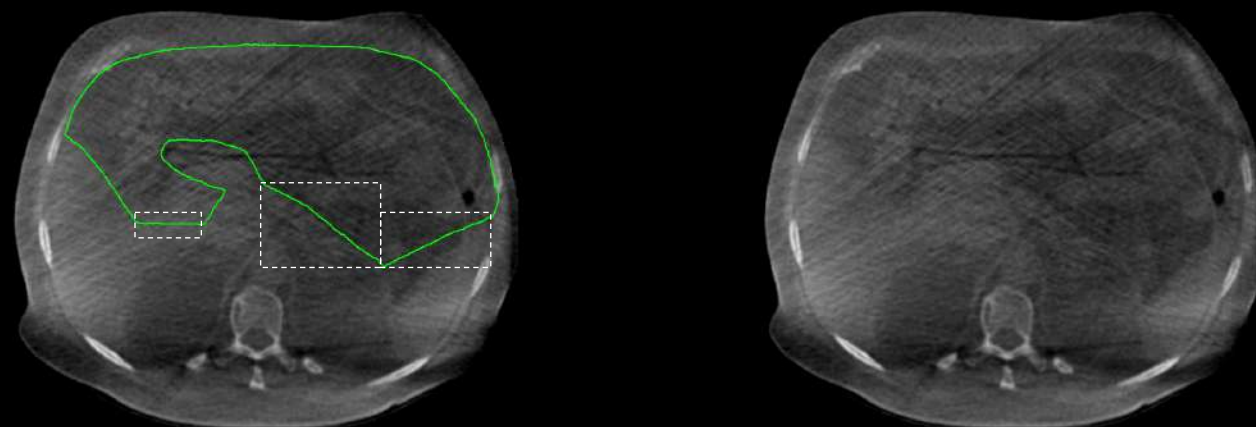

$T(y)=-0.60$

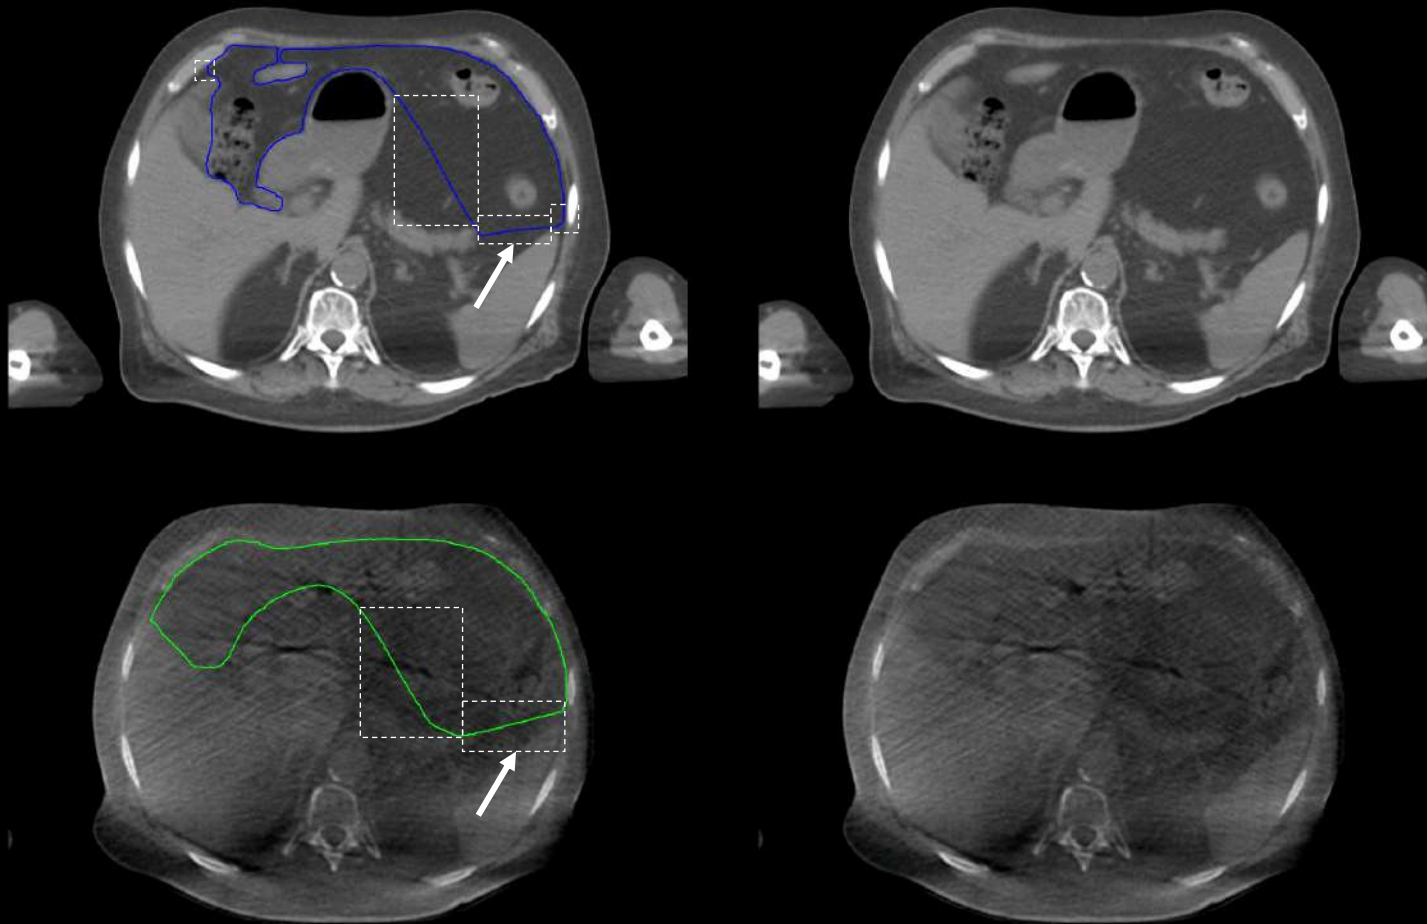

OD#12: straight line from the anterior-most aspect of the spleen to the lateral-most aspect of the pancreas

$T(y)=-0.30$

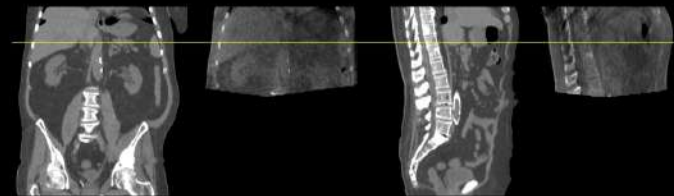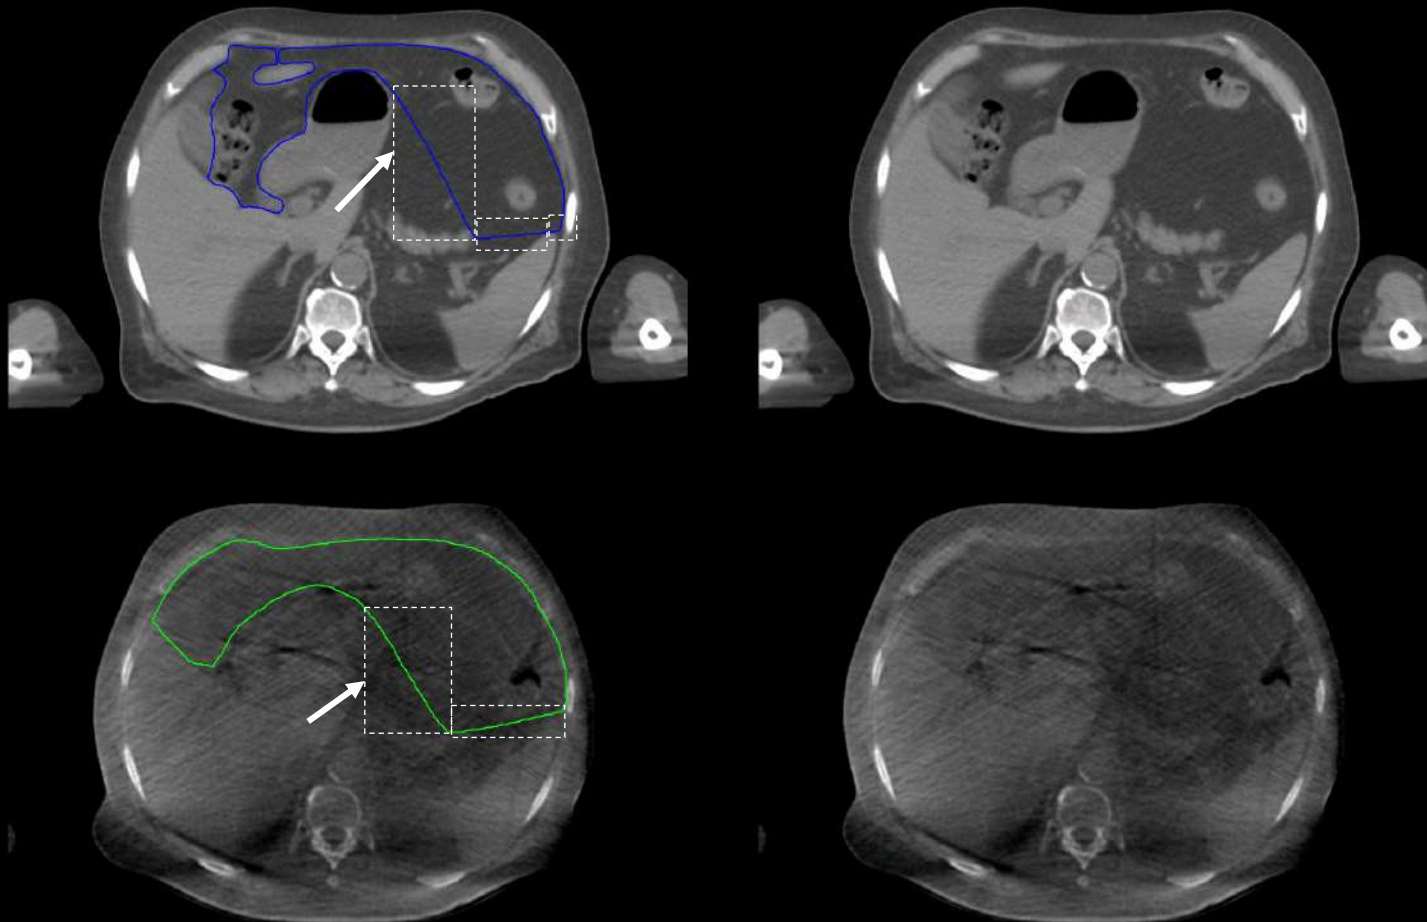

OD#15: straight line from the lateral-most (L) aspect of the stomach to the left lateral-most aspect of the pancreas



$T(y)=0.30$

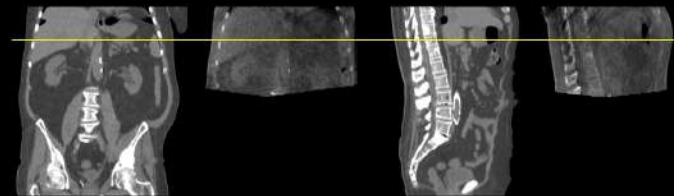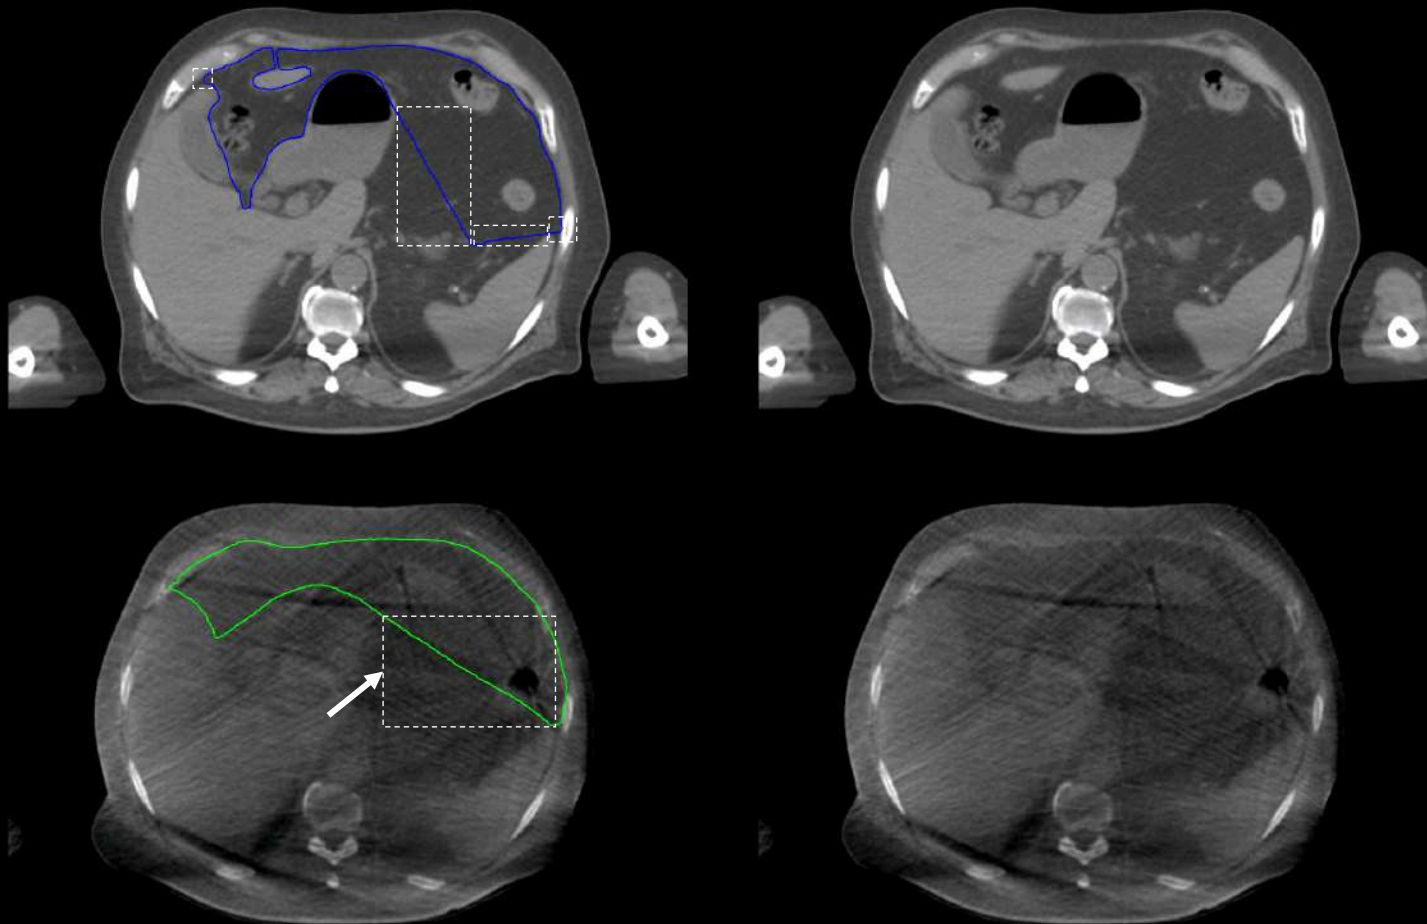

OD#13: straight line from the anterior-most aspect of the spleen to the lateral-most aspect of the stomach

$T(y)=1.20$

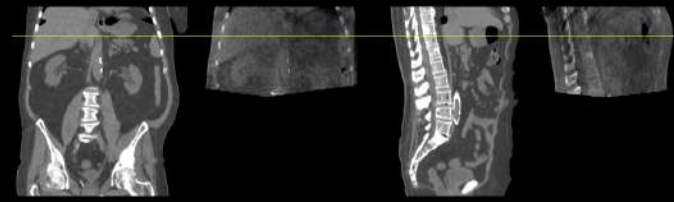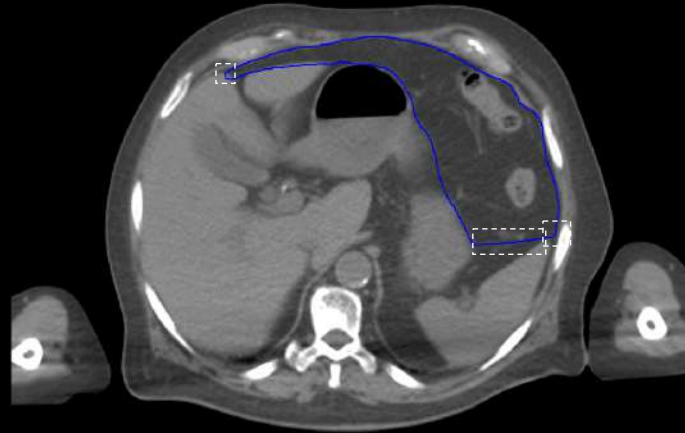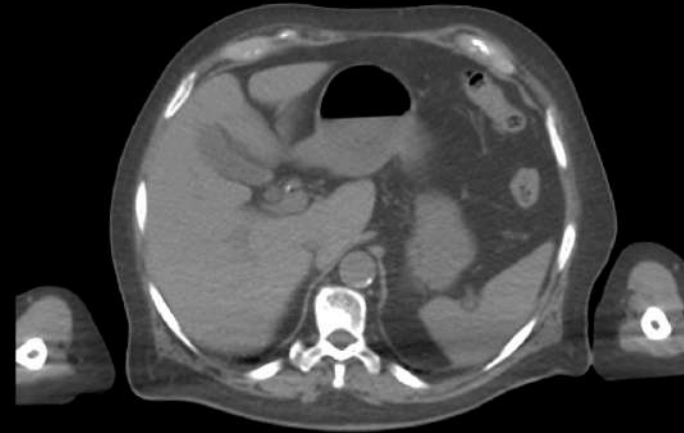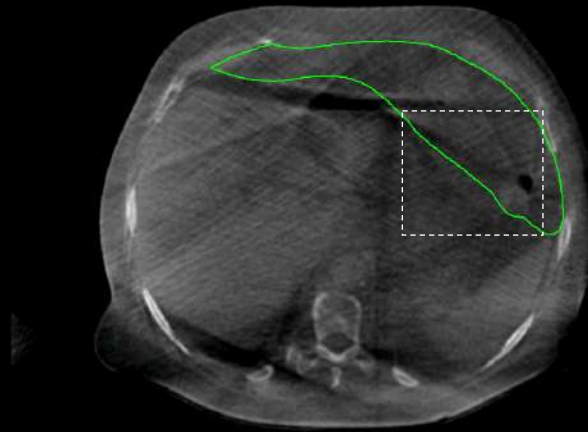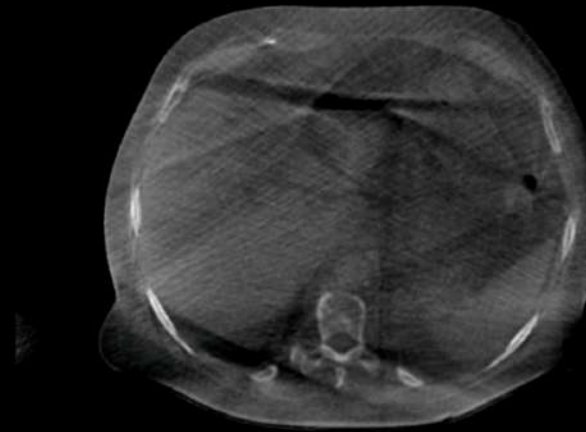



$T(y)=2.10$

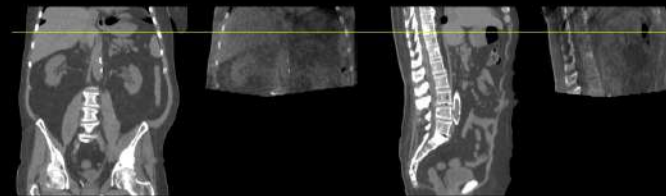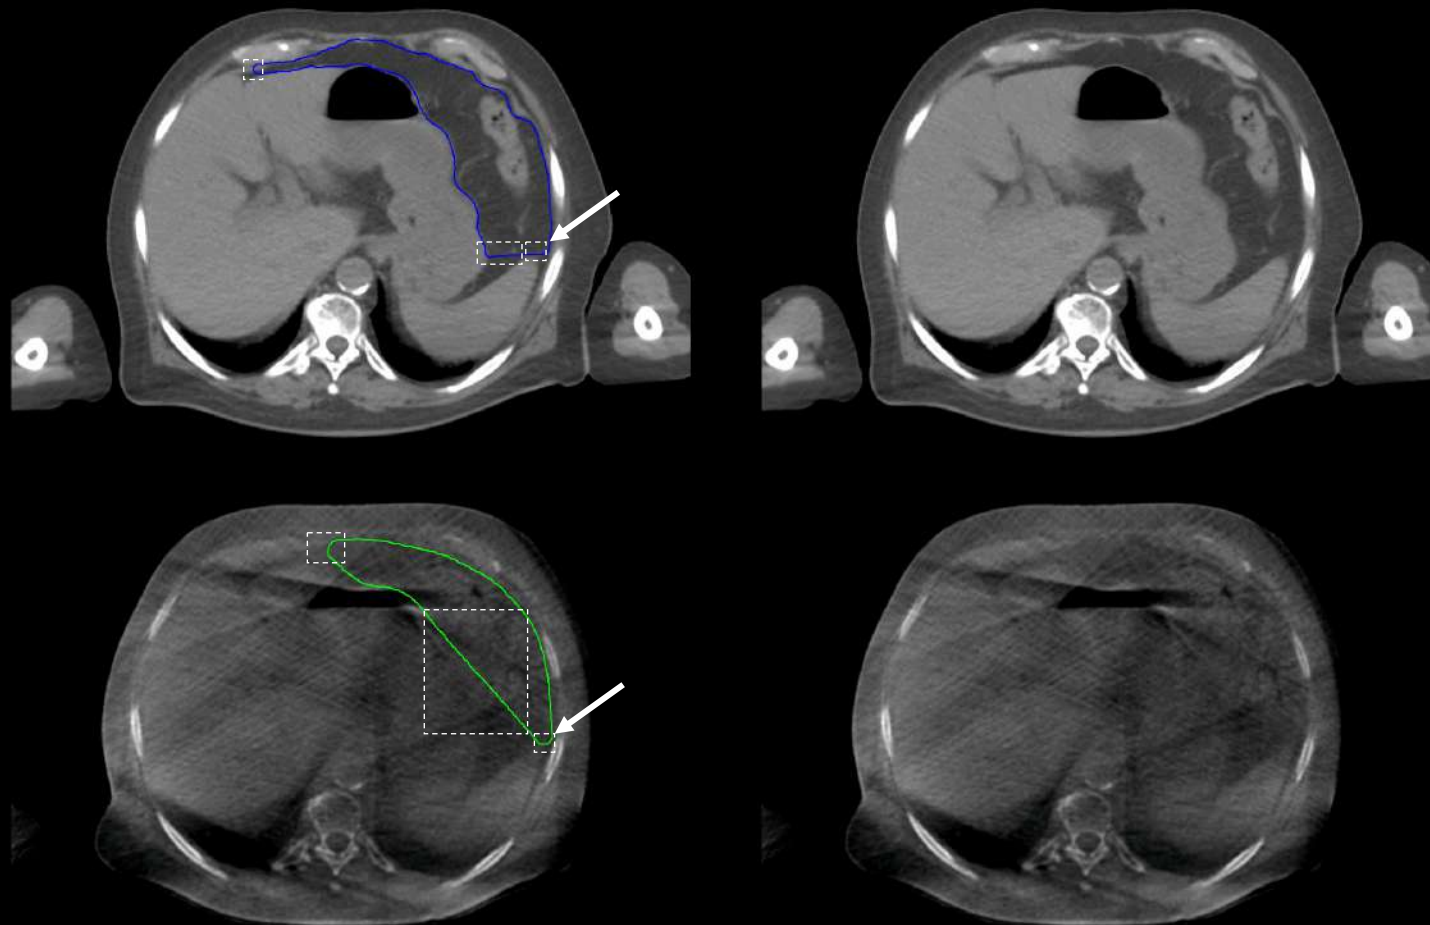

OD#11: lateral line from the anterior-most aspect of the spleen to intersect the transverse abdominis

T(y)=3.00

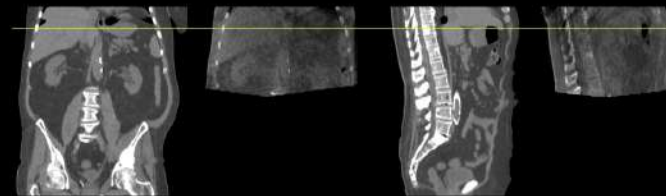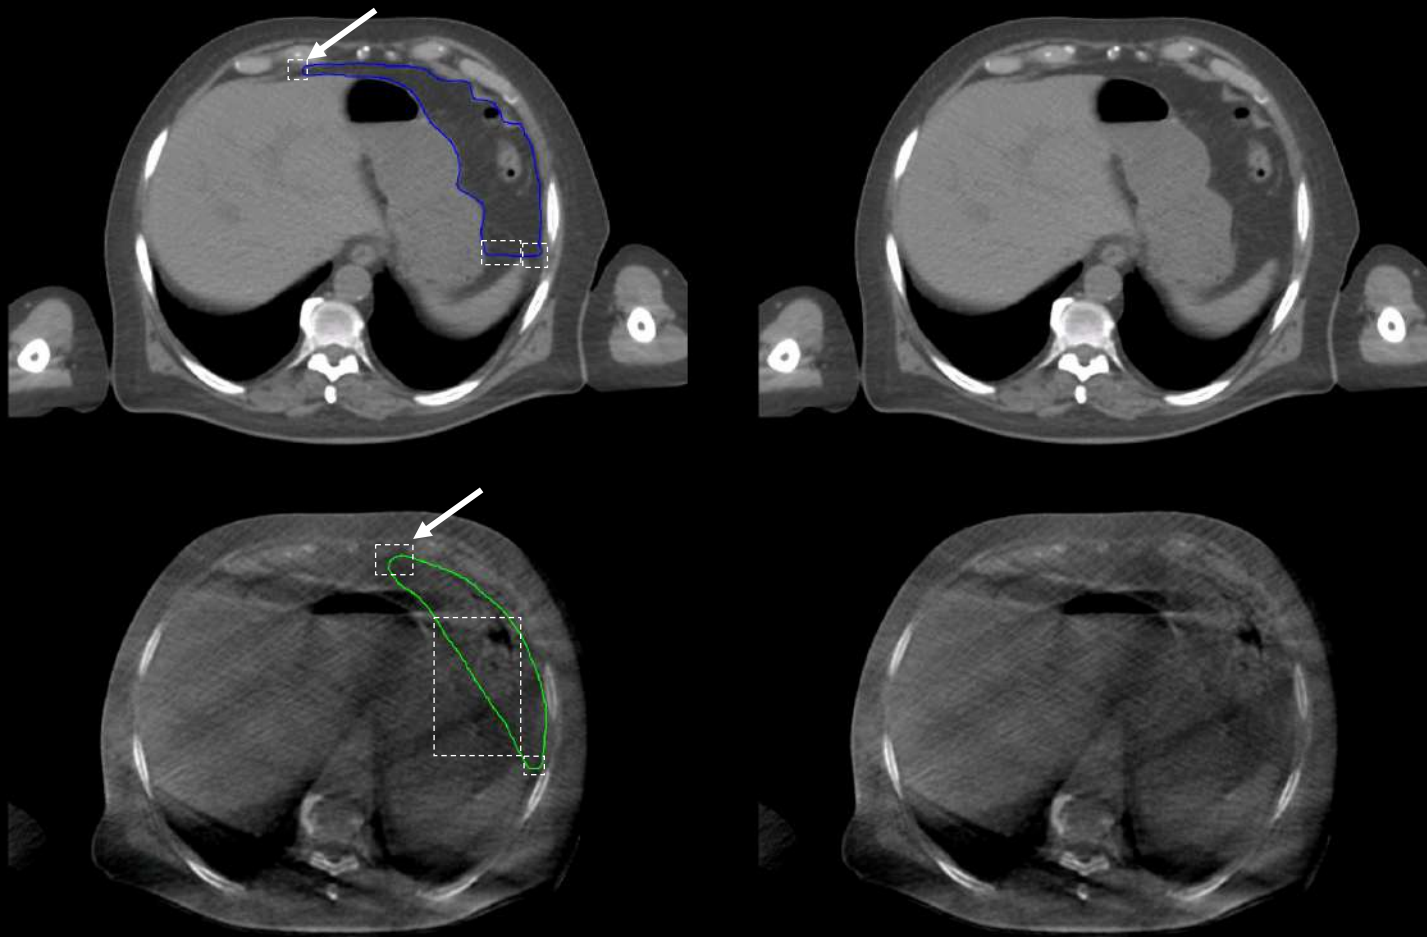

OD#10: minimum distance line from the anterior-most aspect of the liver to intersect the rectus abdominis

$T(y)=3.60$

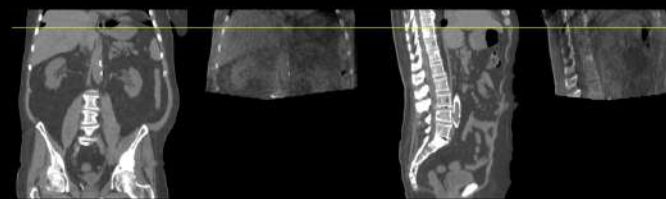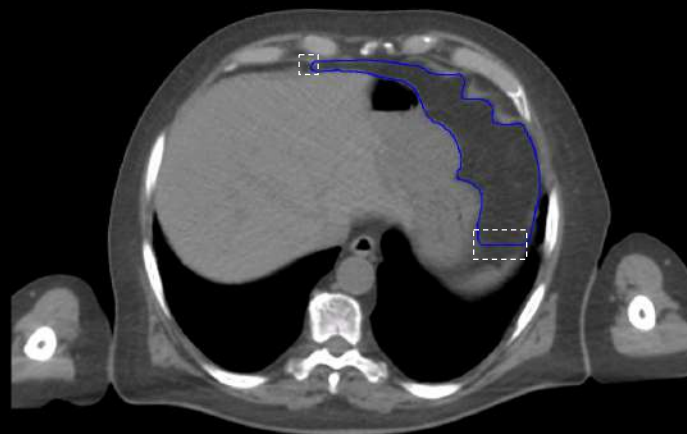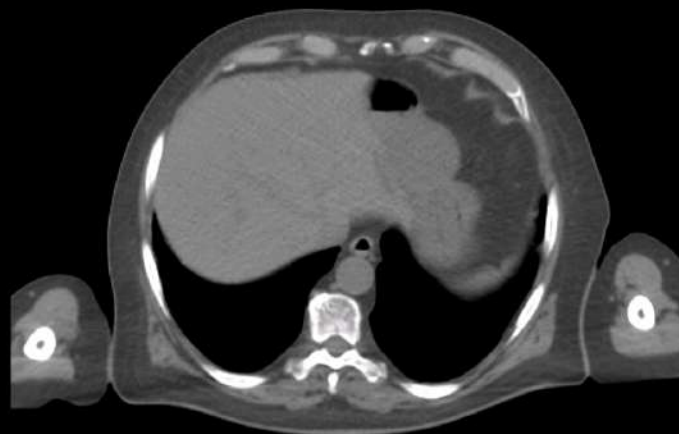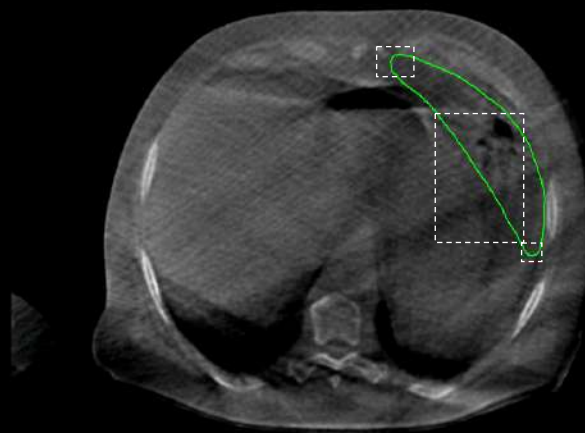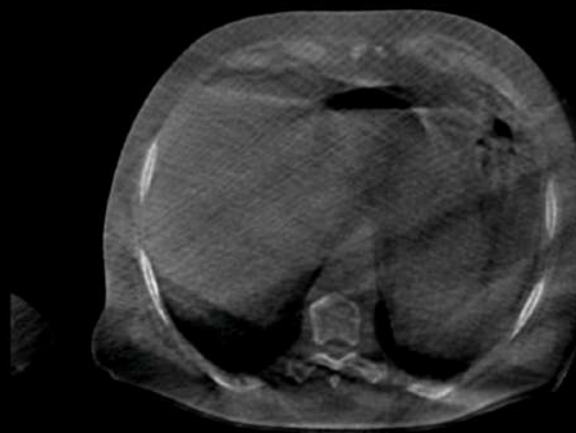

$T(y)=3.90$

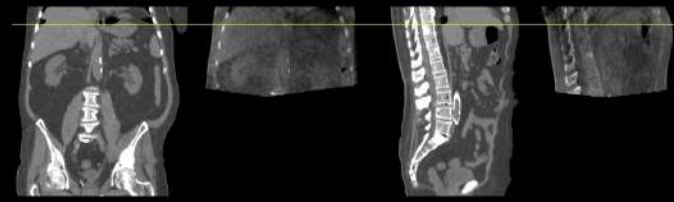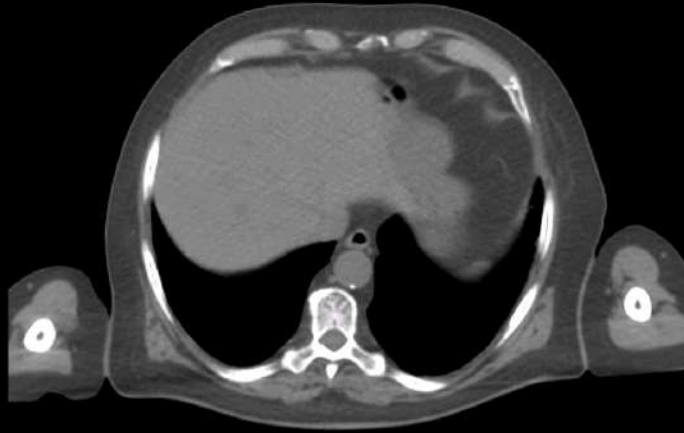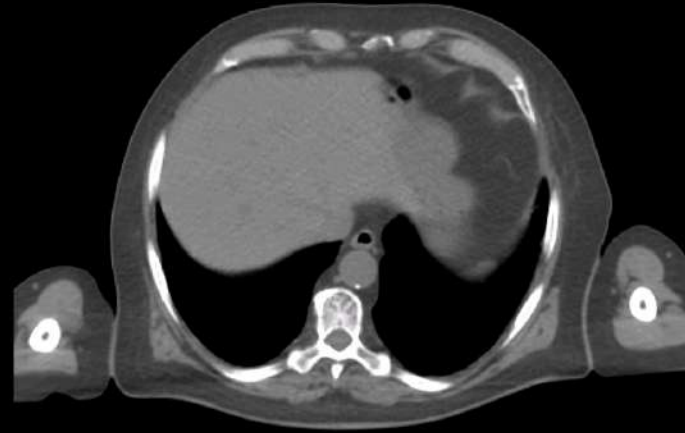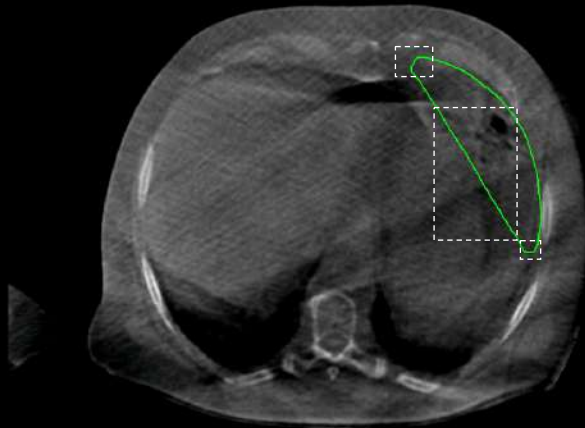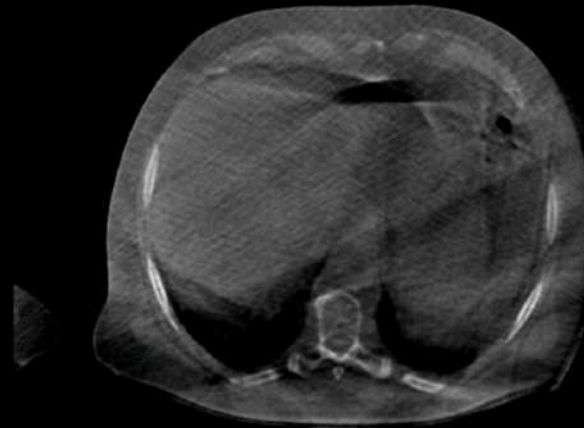

$T(y)=4.80$

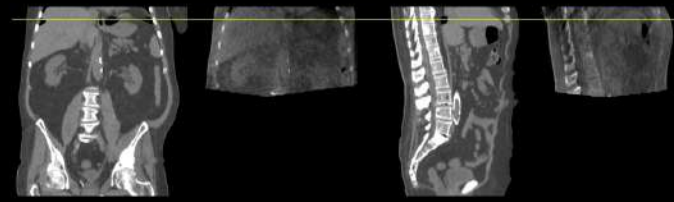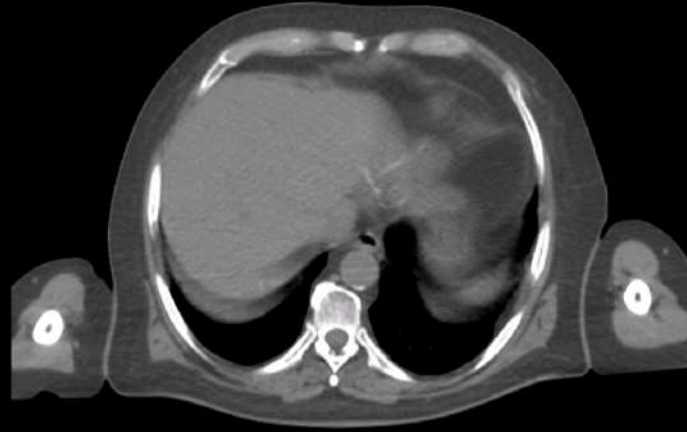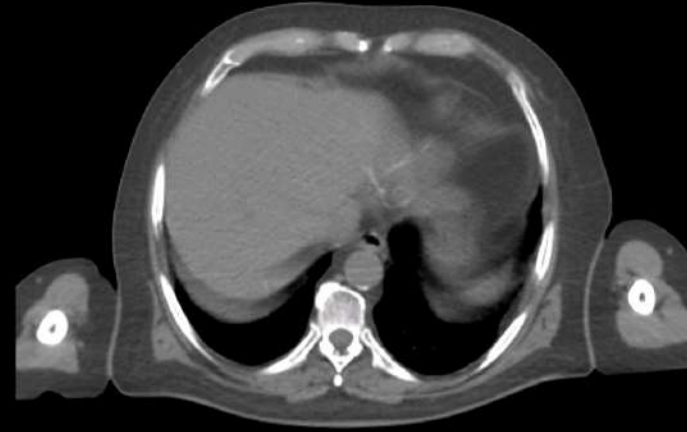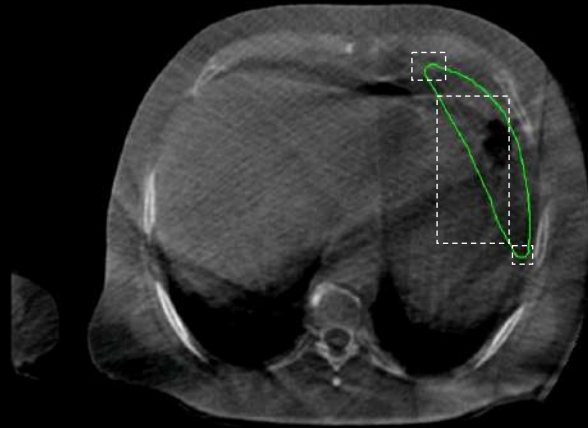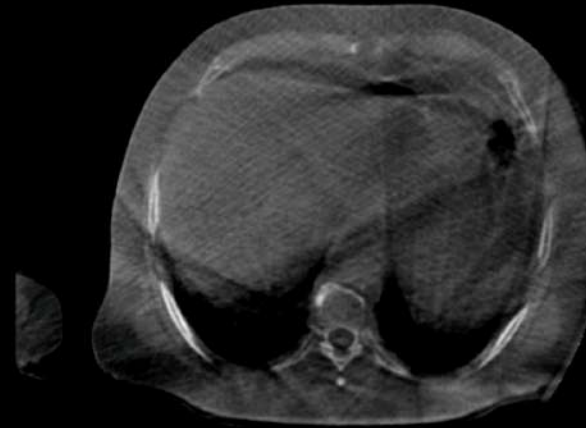



$T(y)=5.70$

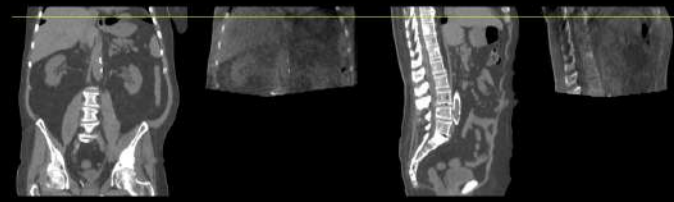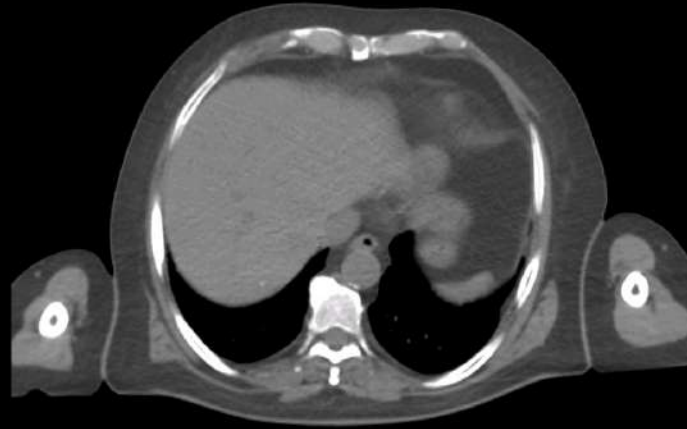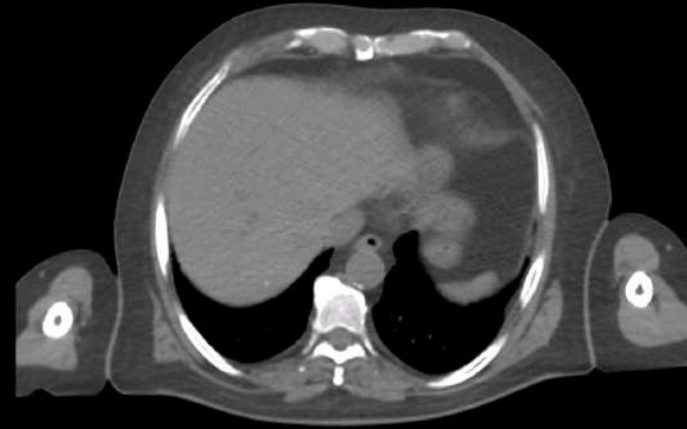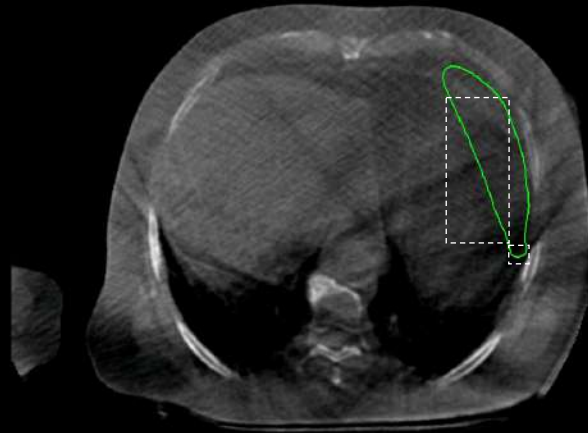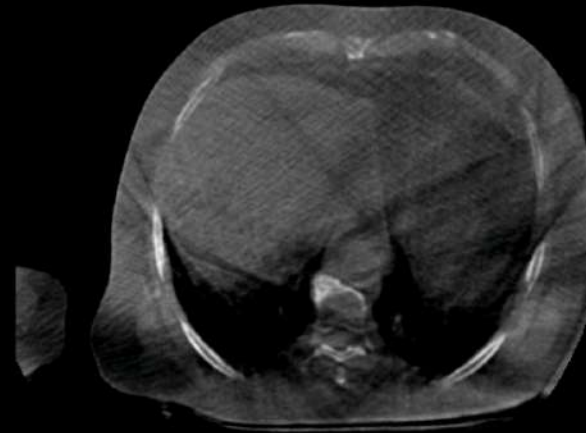



$T(y)=6.00$

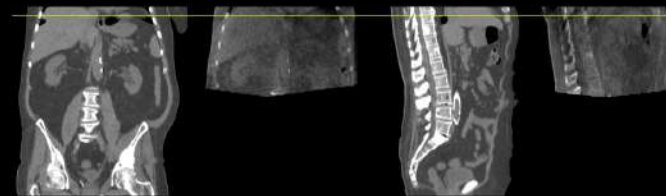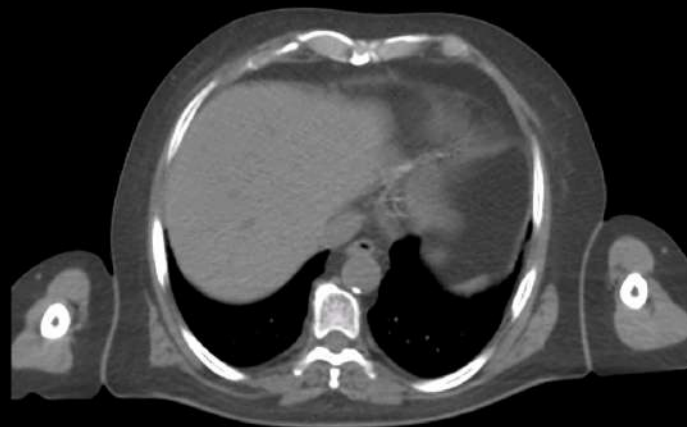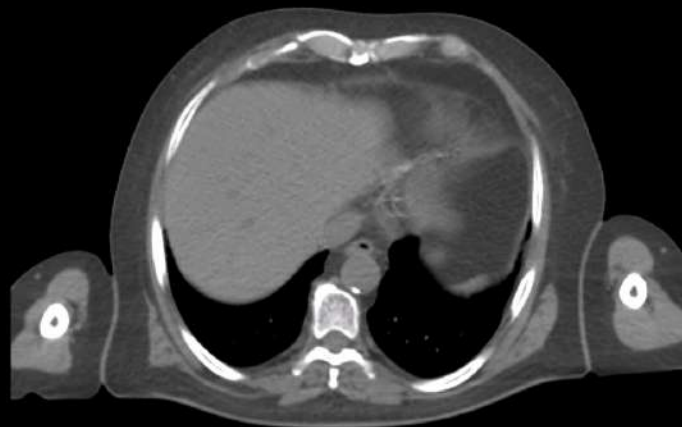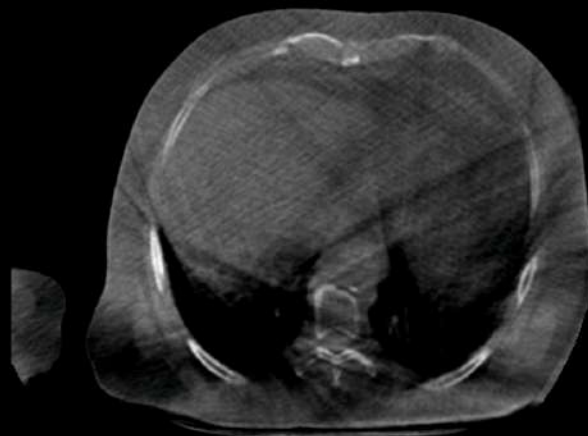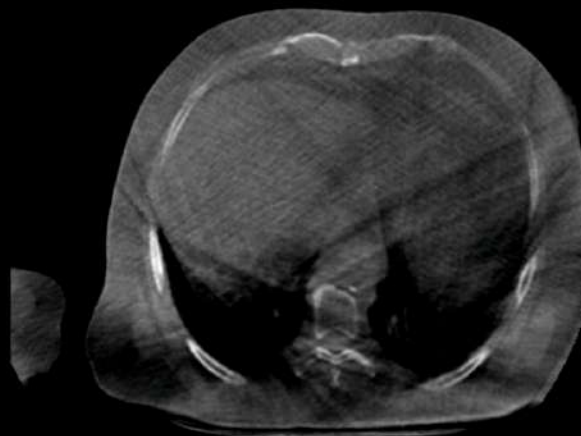

# Pelvic Female

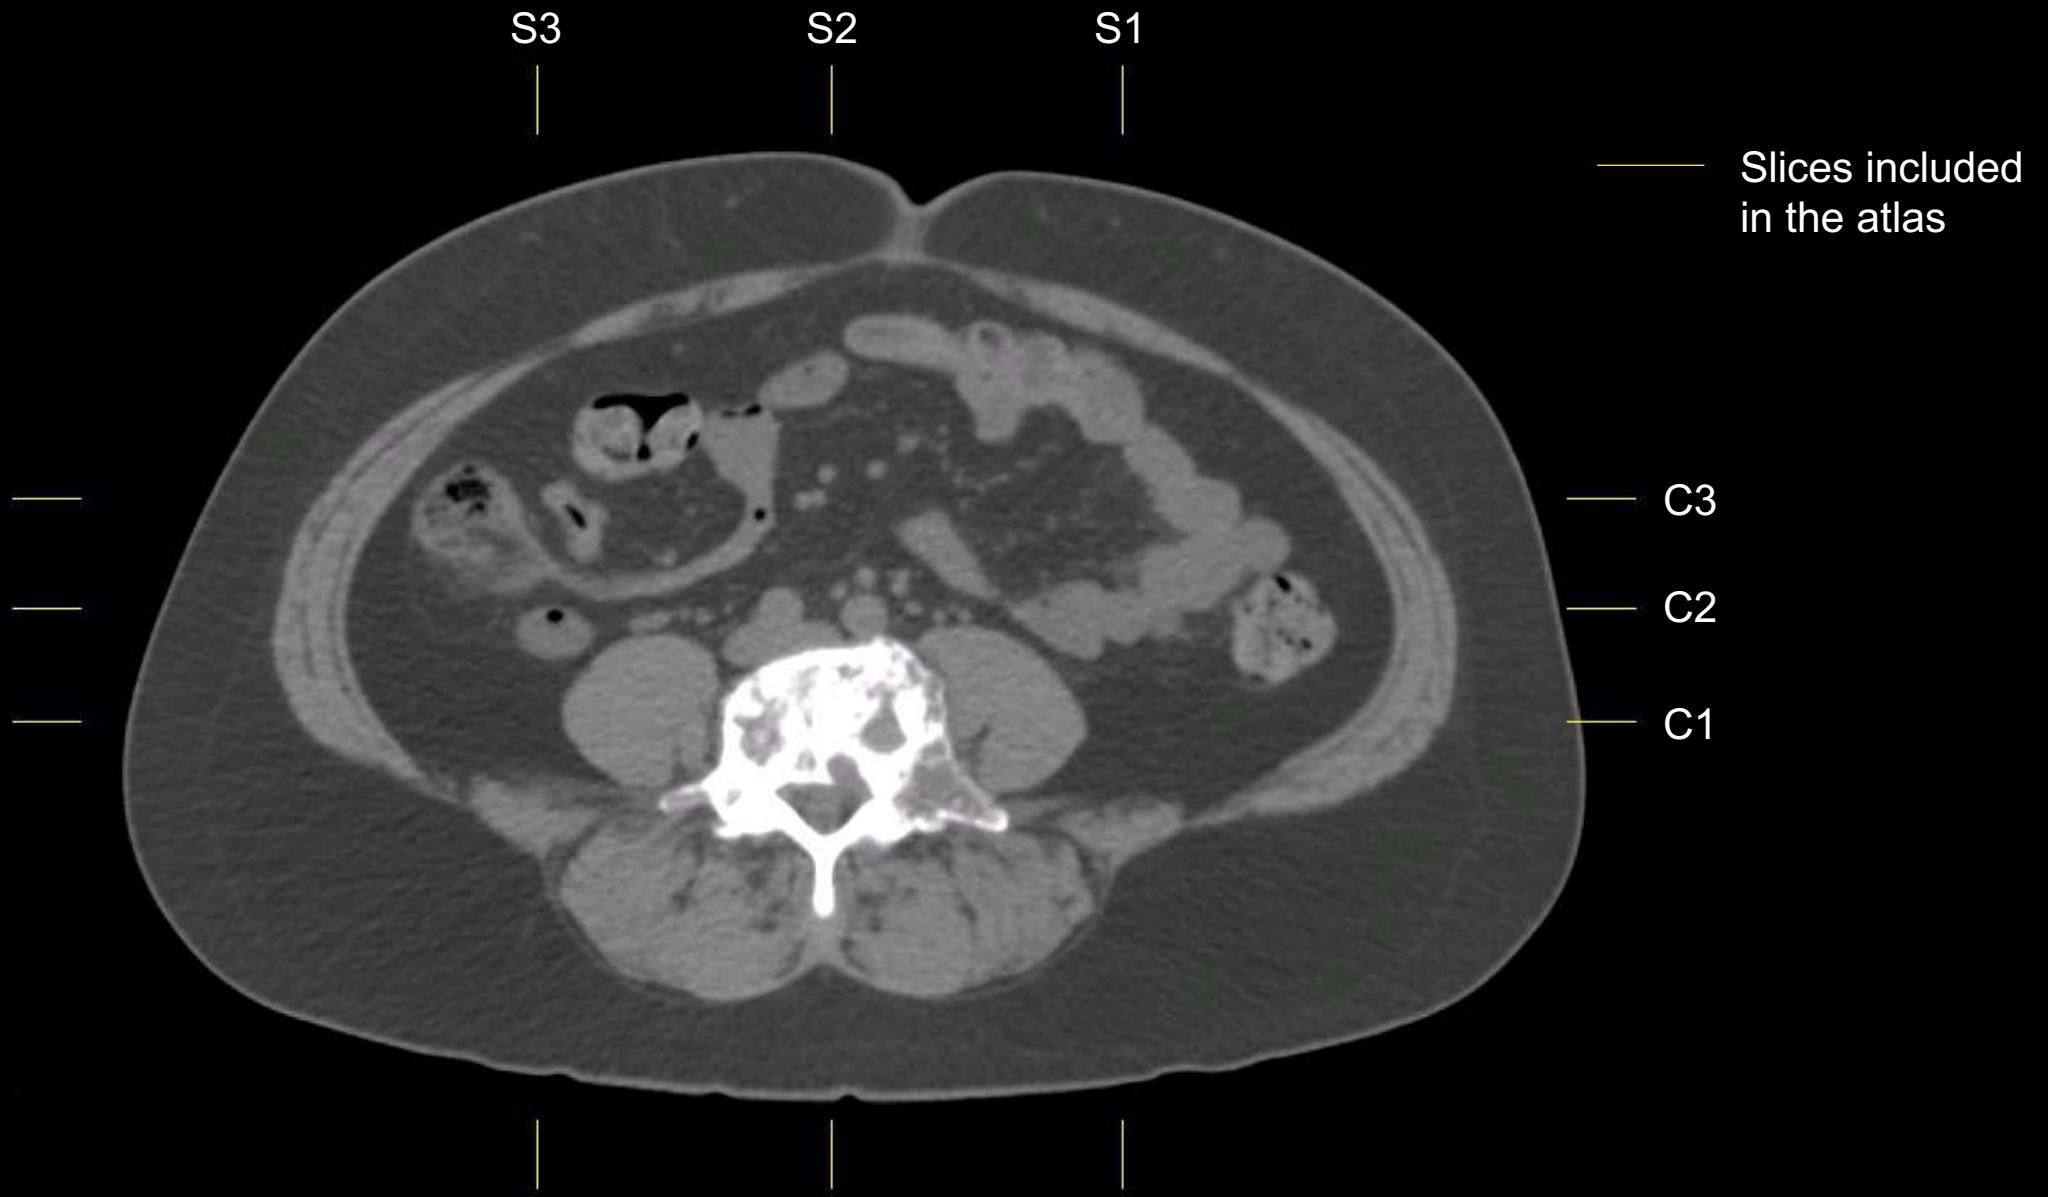

C1 C2 C3

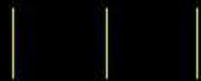

— Slices included in the atlas

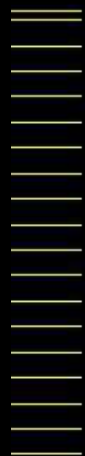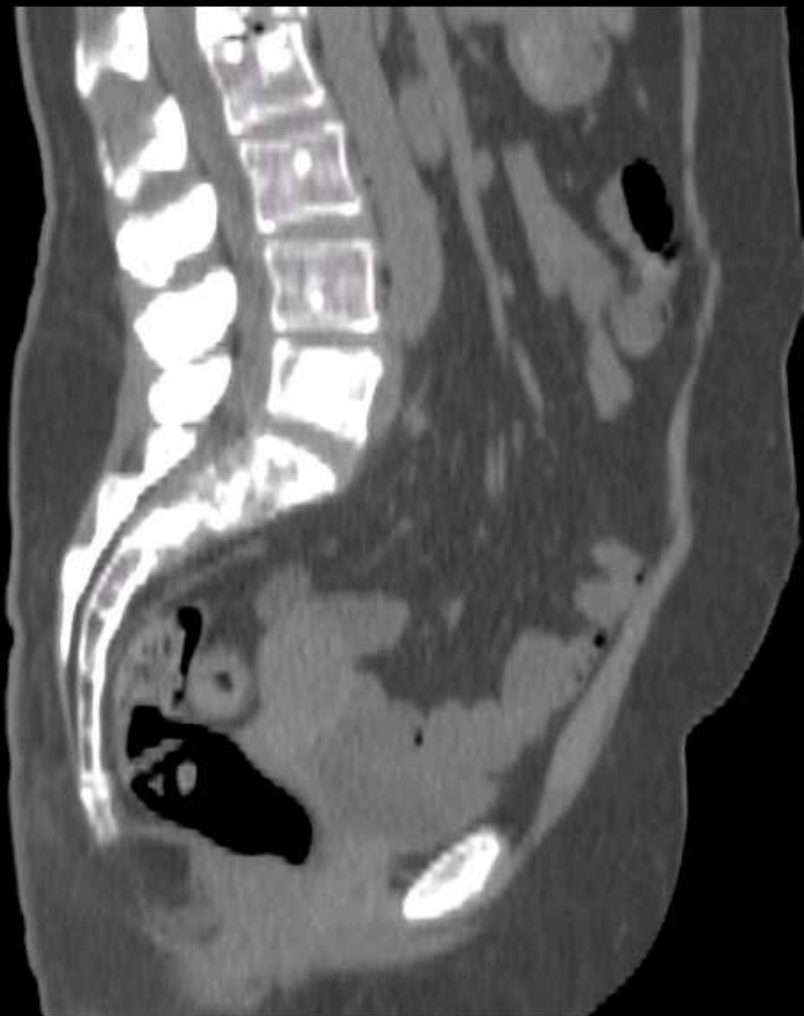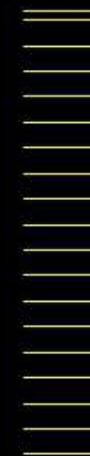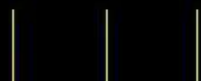

S3

S2

S1

— Slices included  
in the atlas

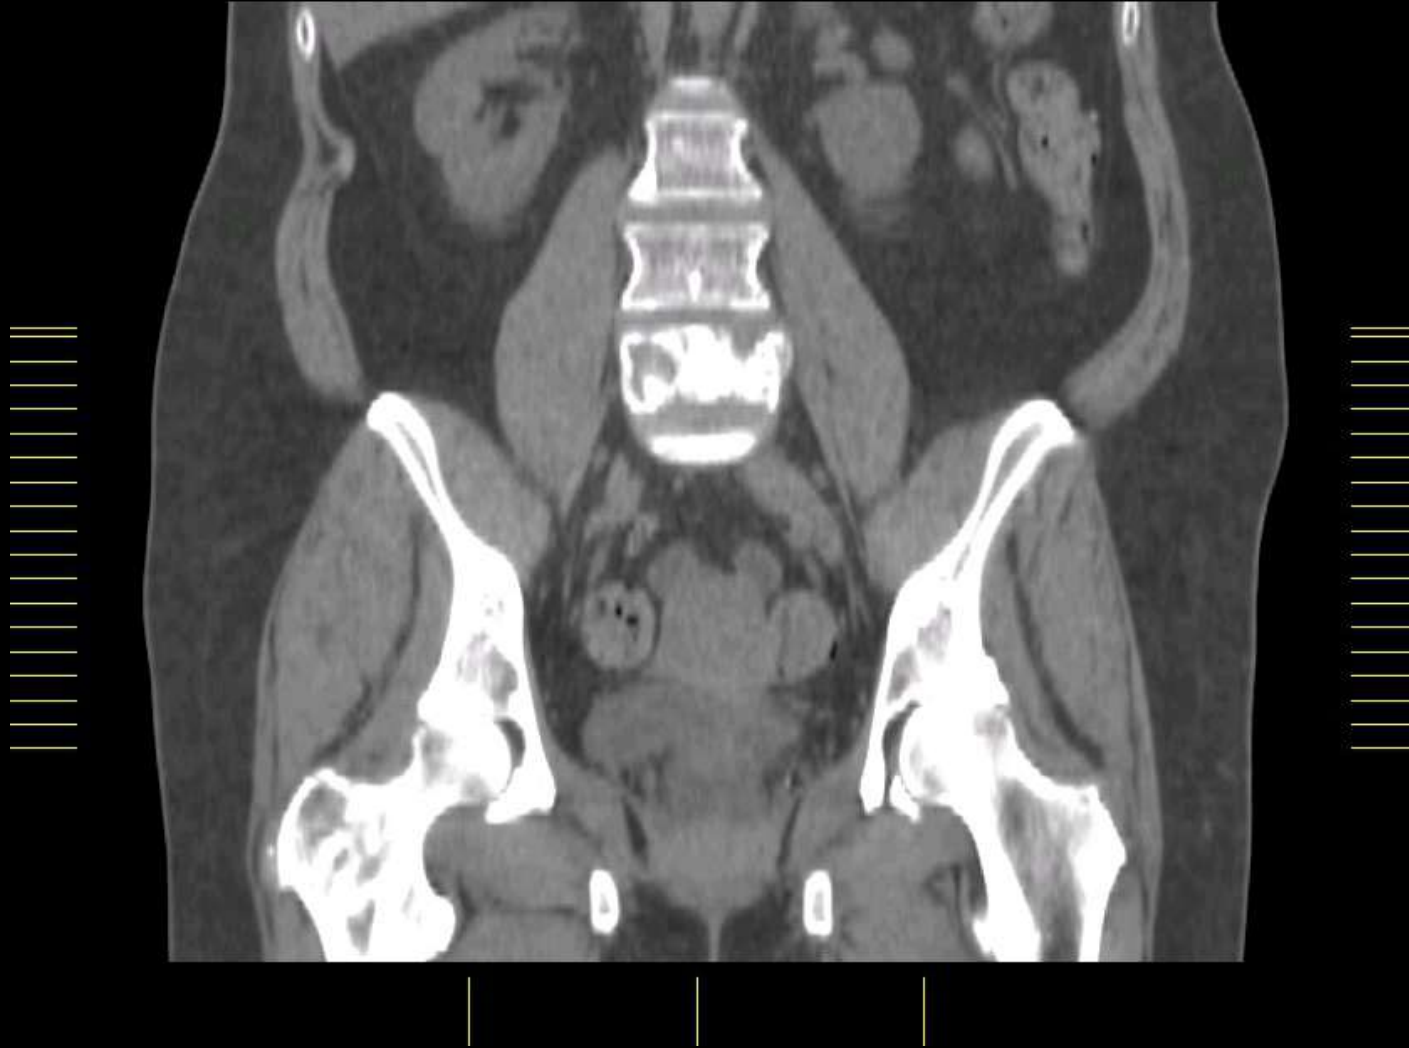

C1

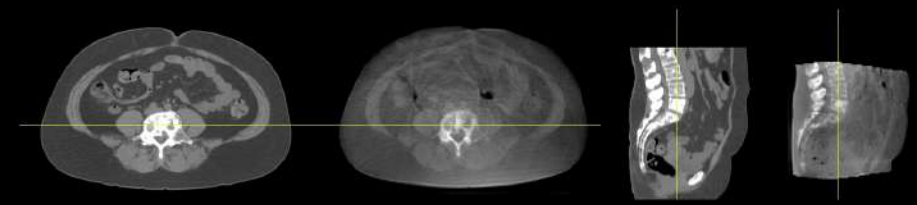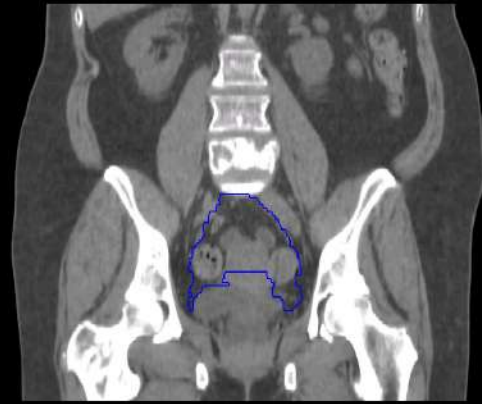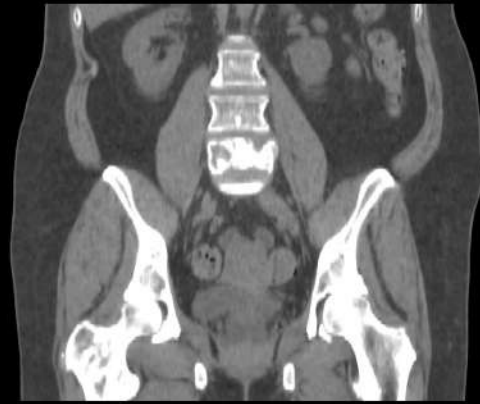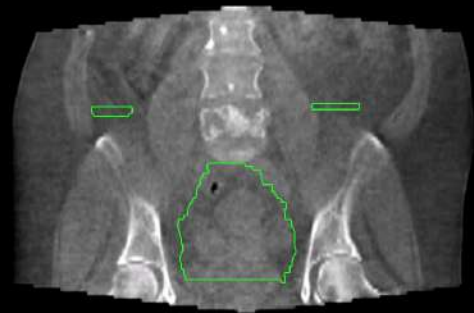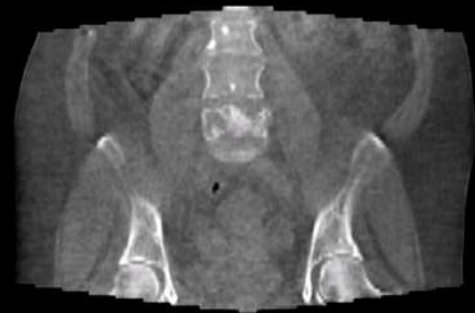



C2

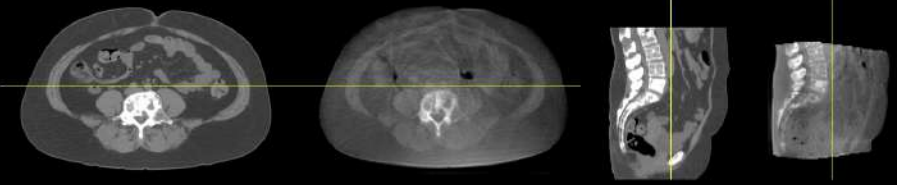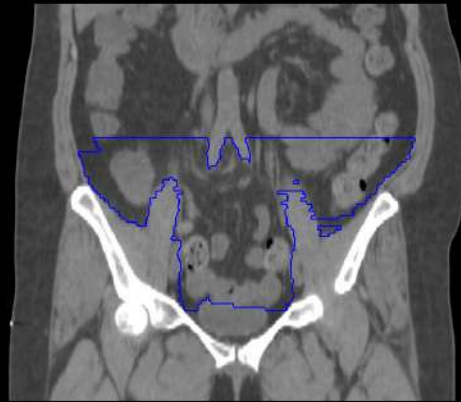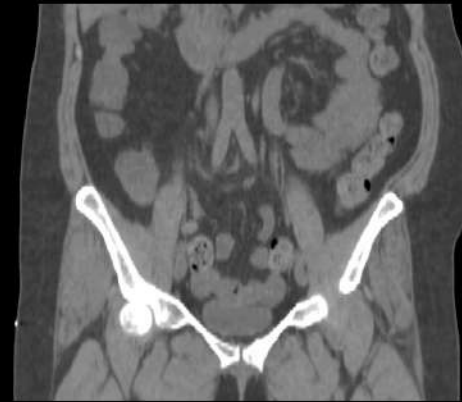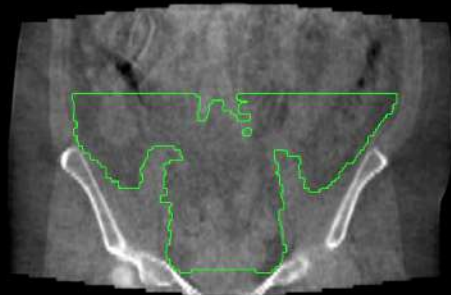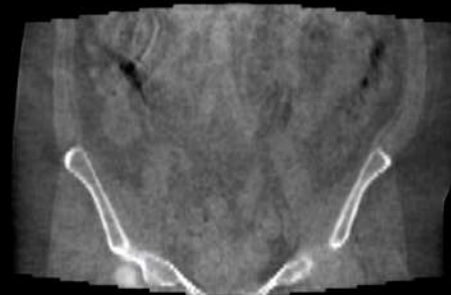

C3

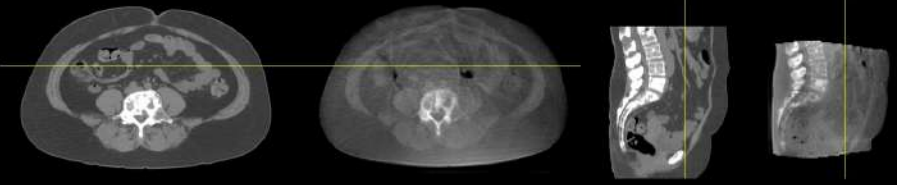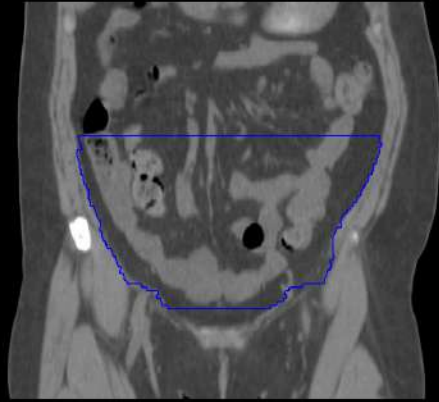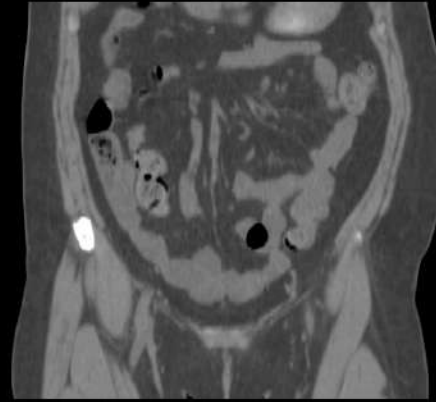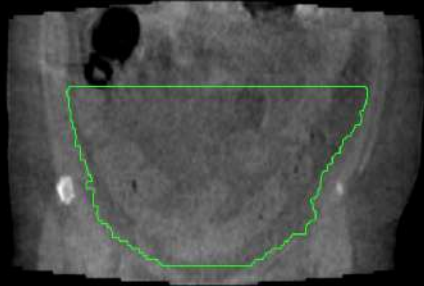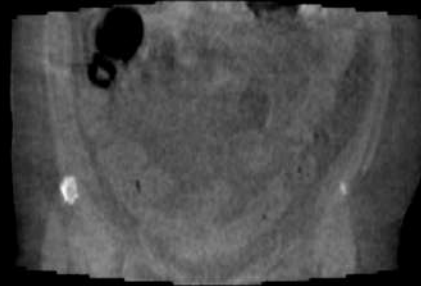

S1

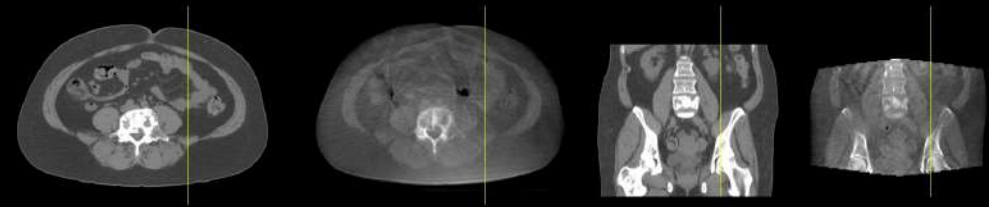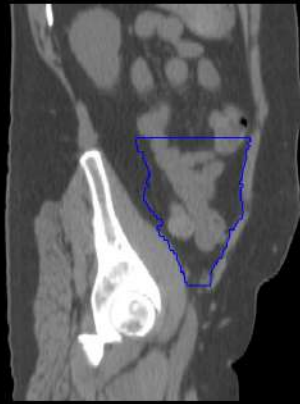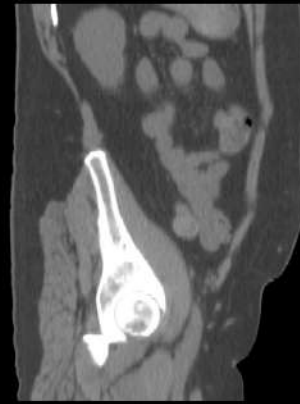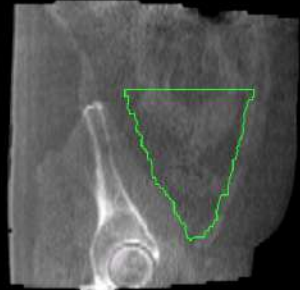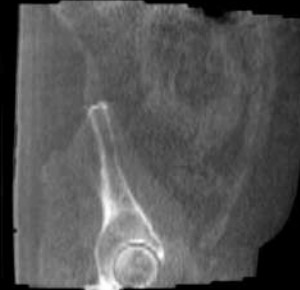

S2

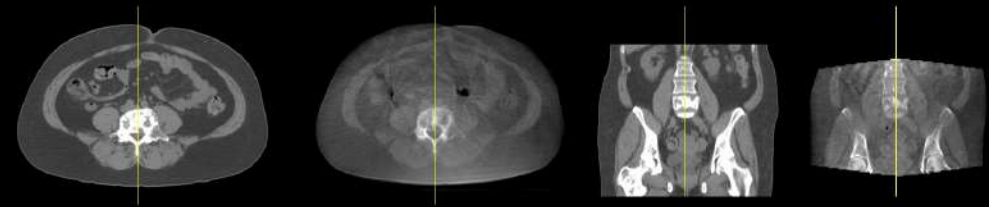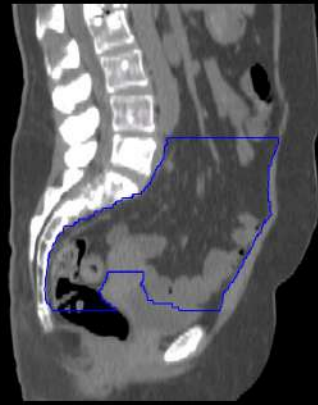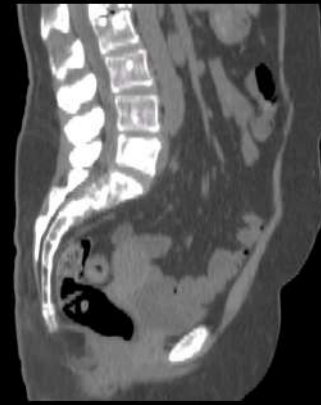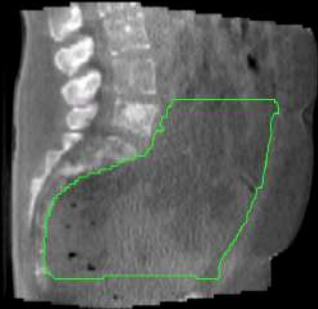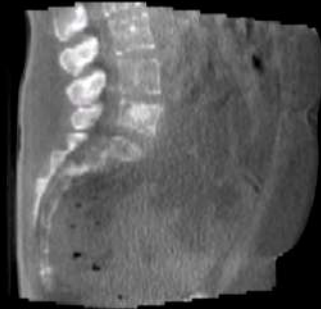

S3

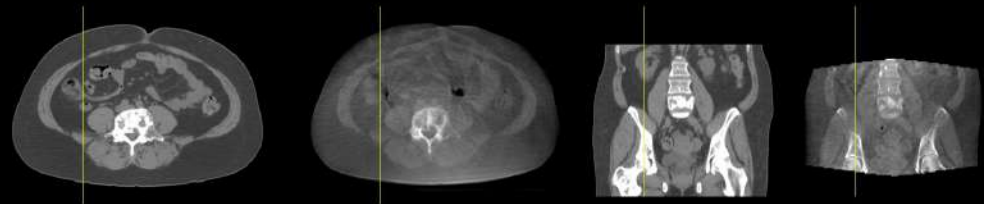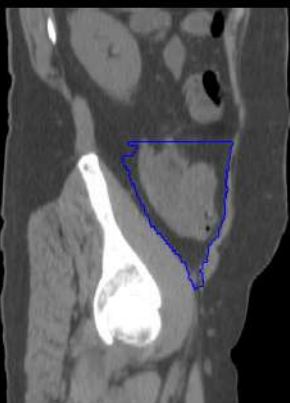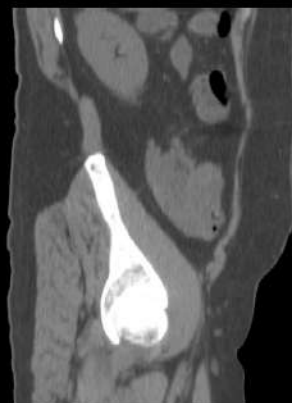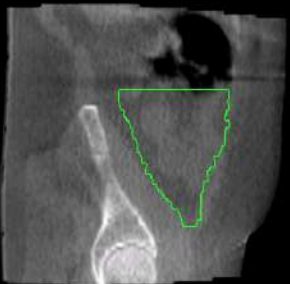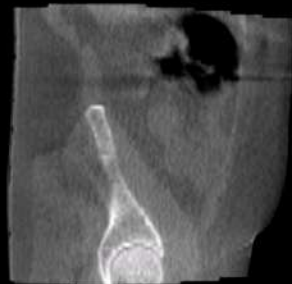

$T(y)=0.30$

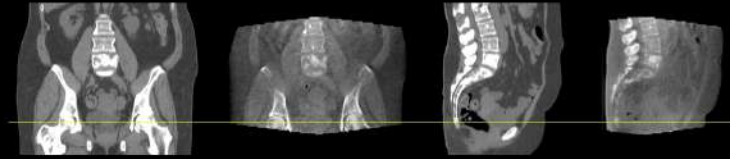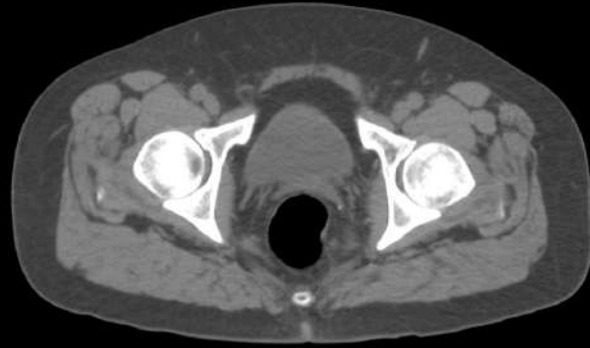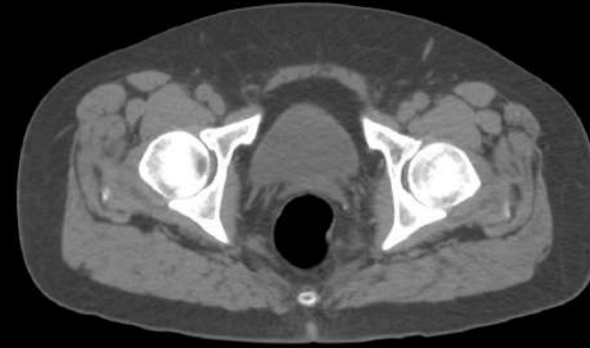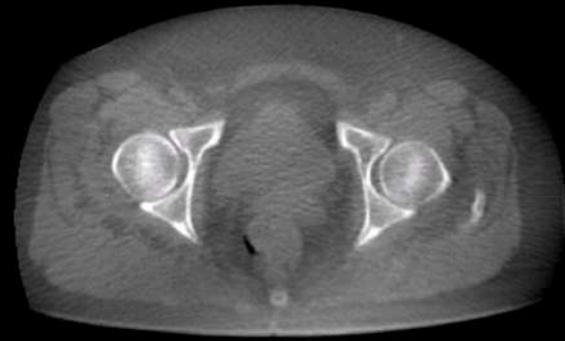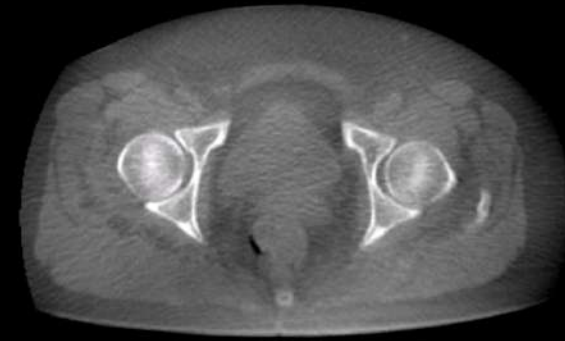



$T(y)=1.20$

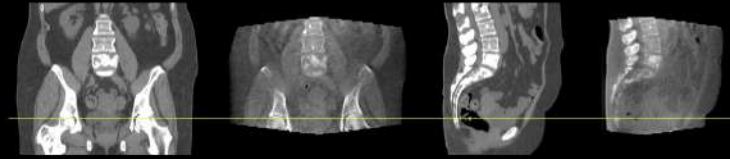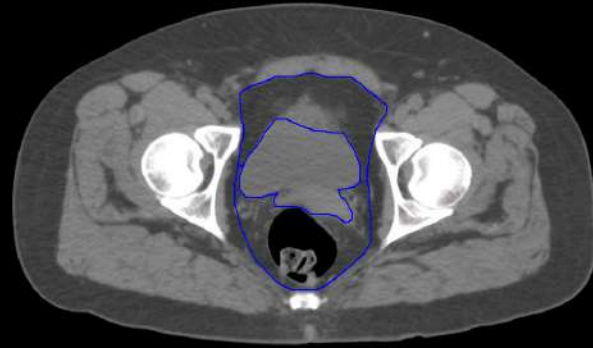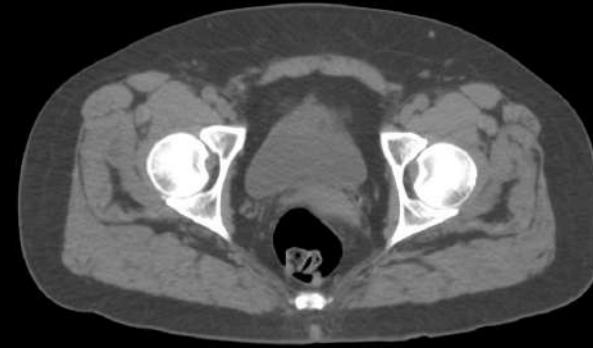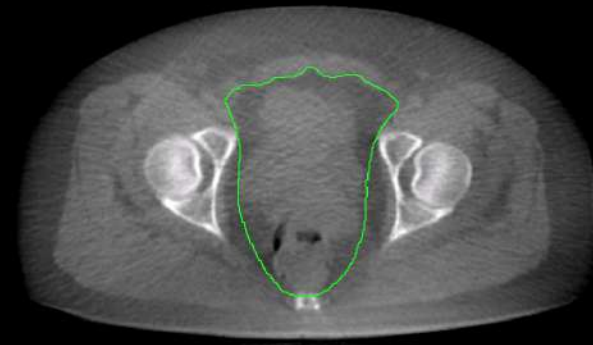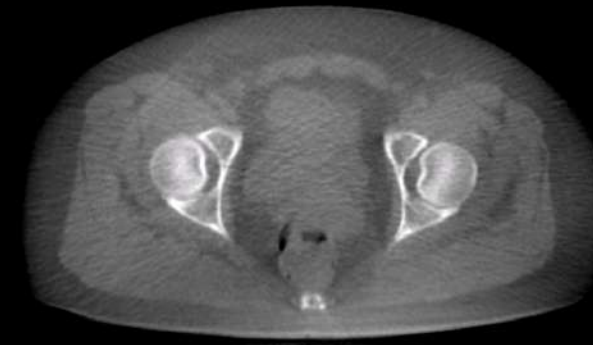

$T(y)=2.10$

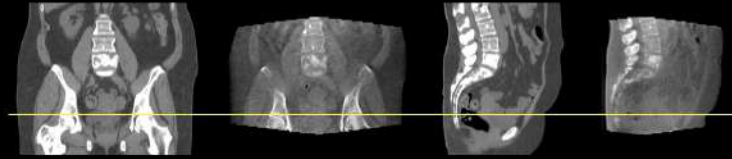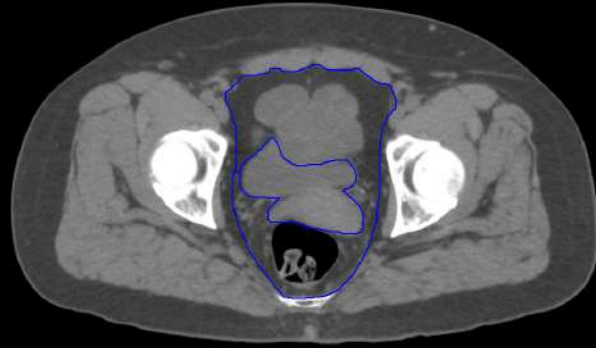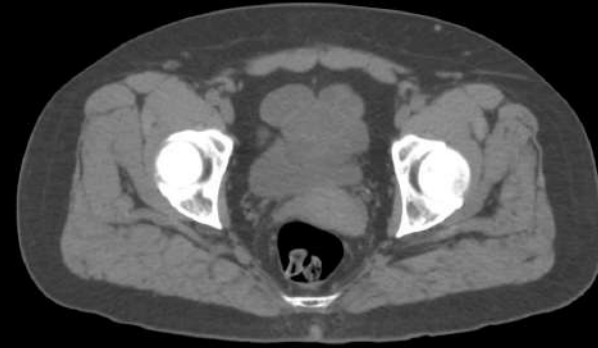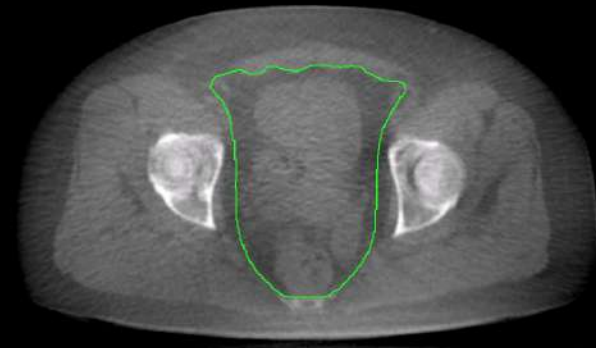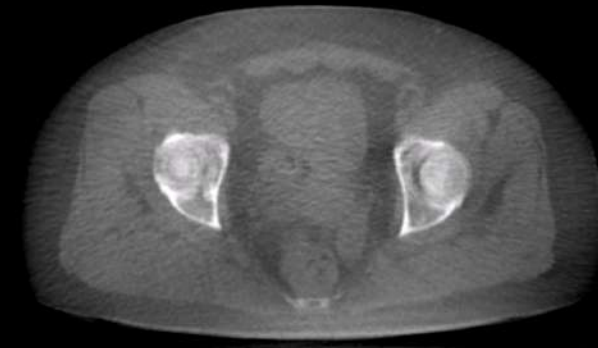

$T(y)=3.00$

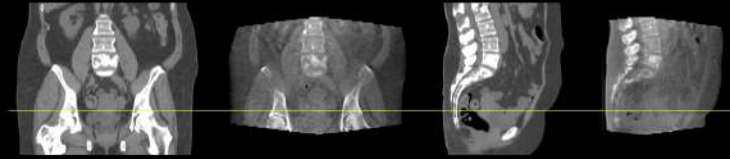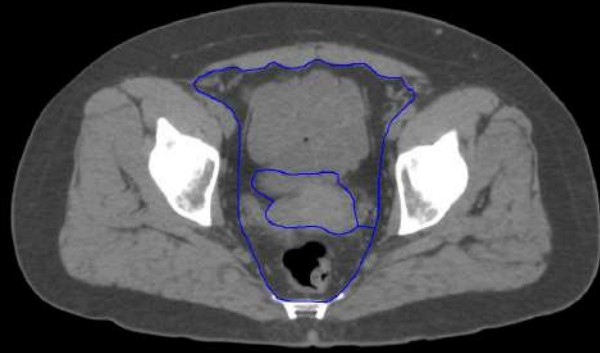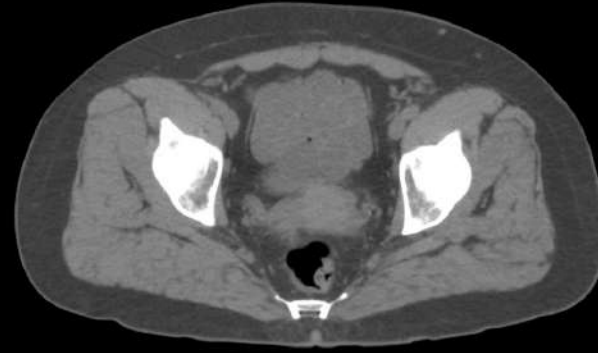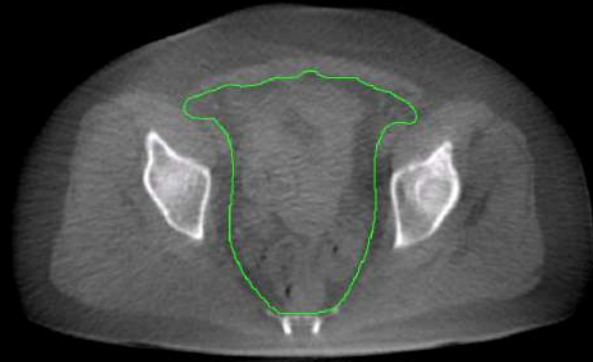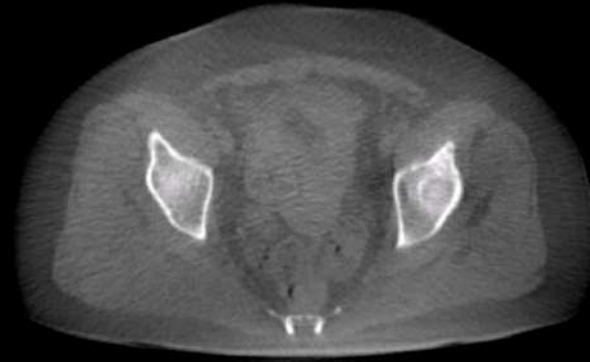

$T(y)=3.90$

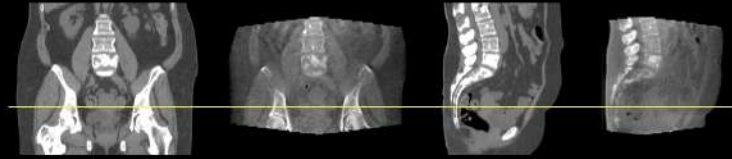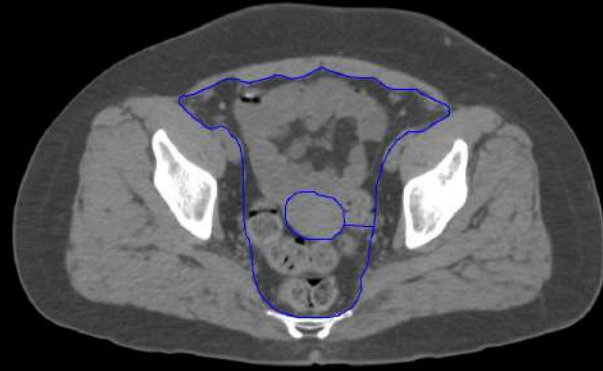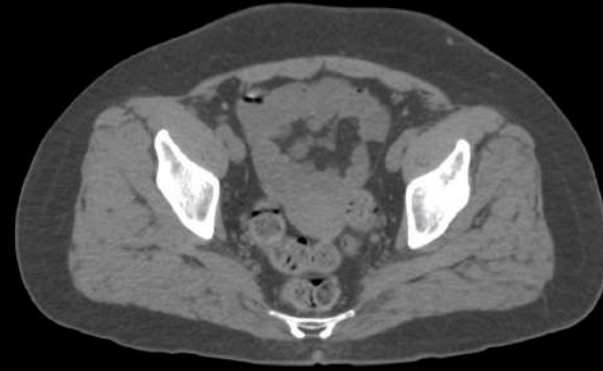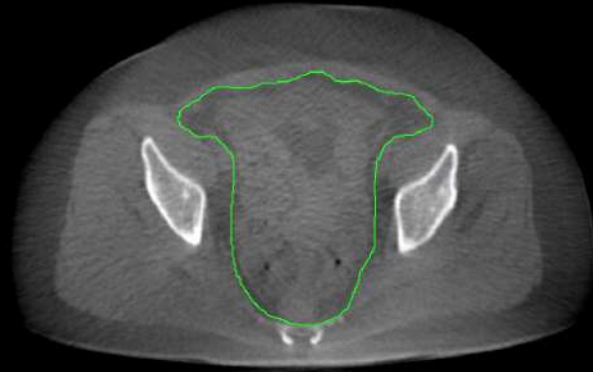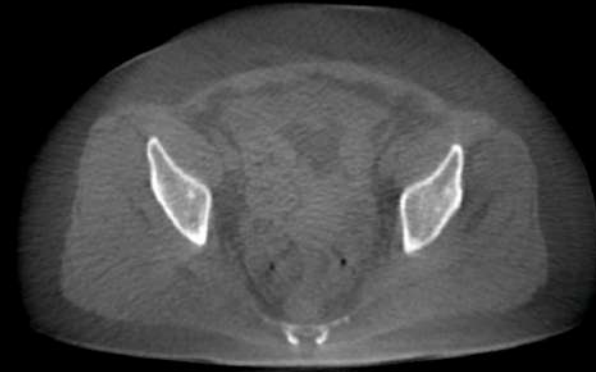

$T(y)=4.80$

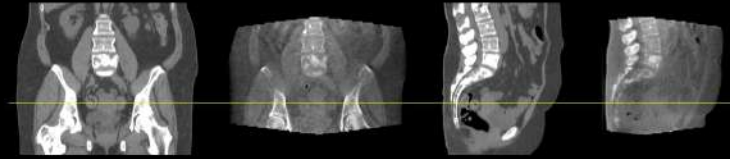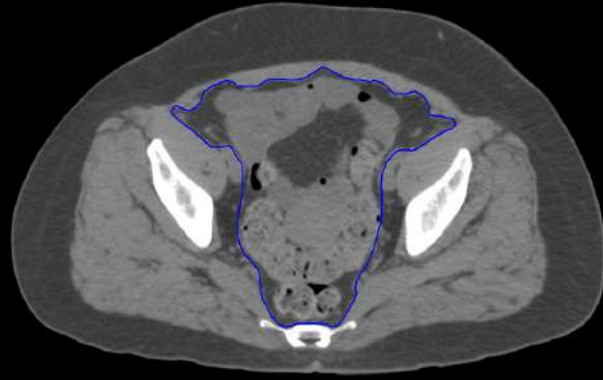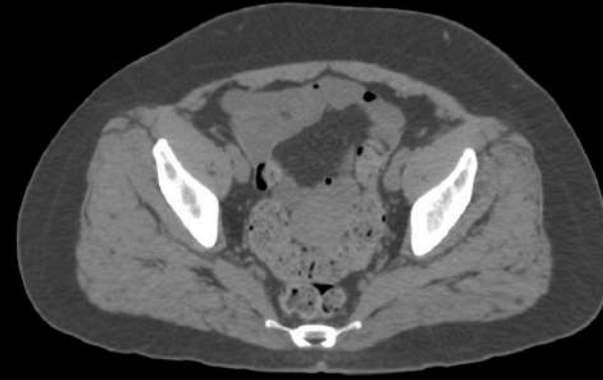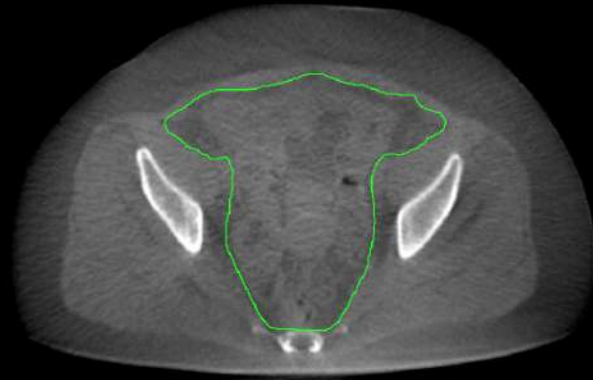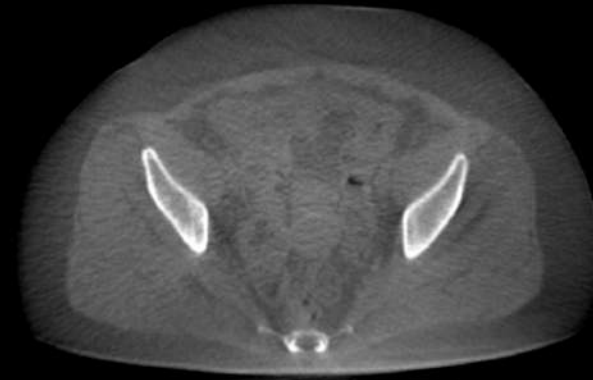



$T(y)=5.70$

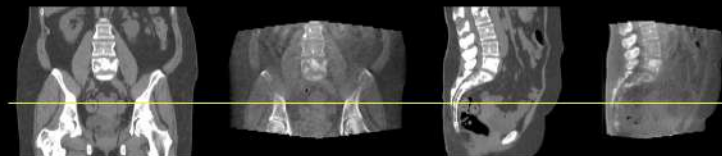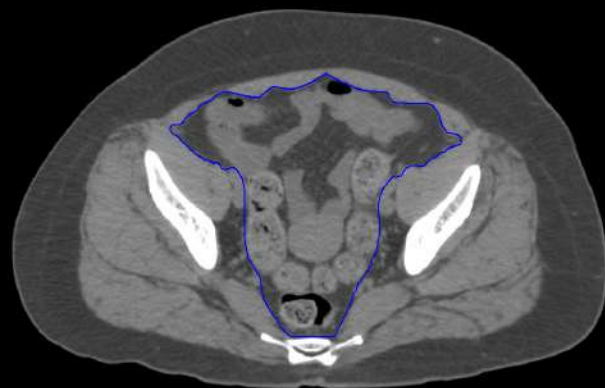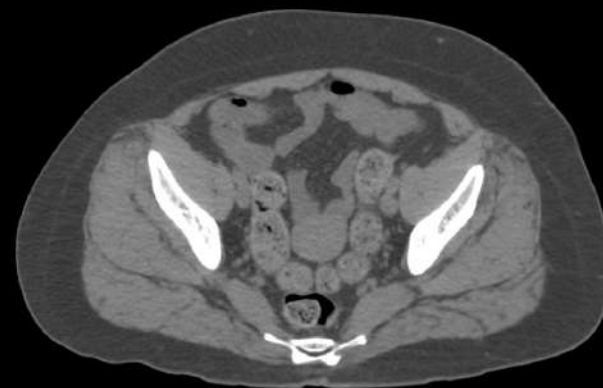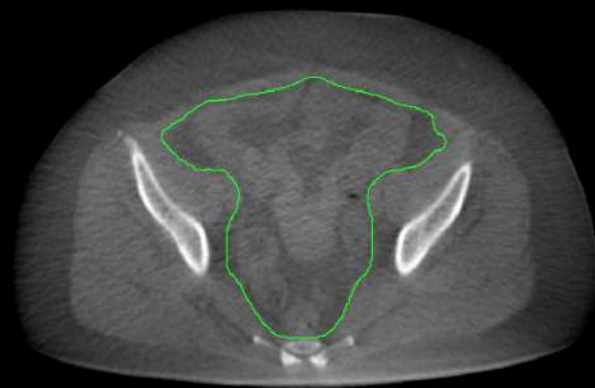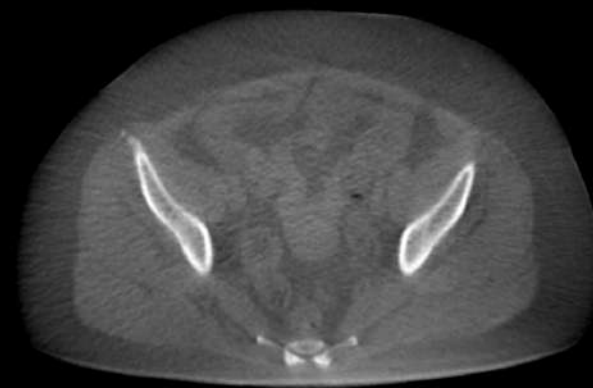



$T(y)=6.60$

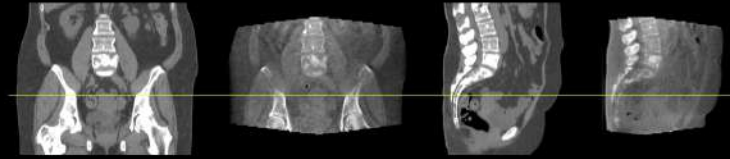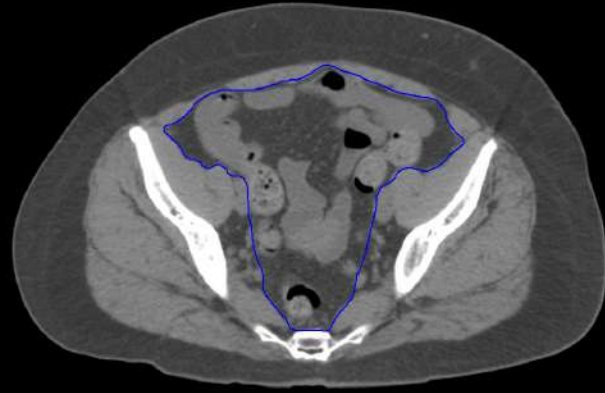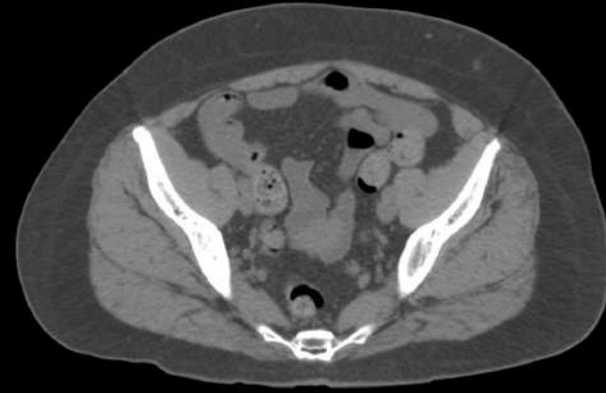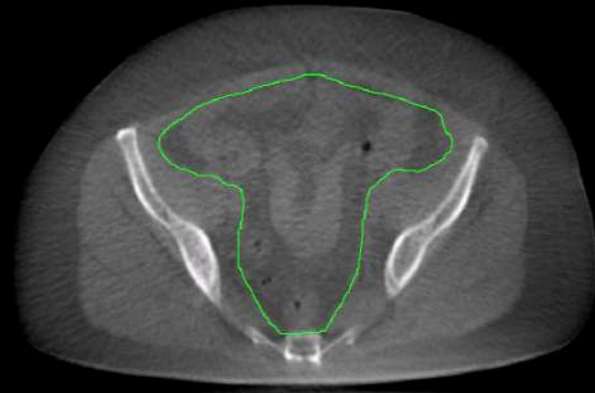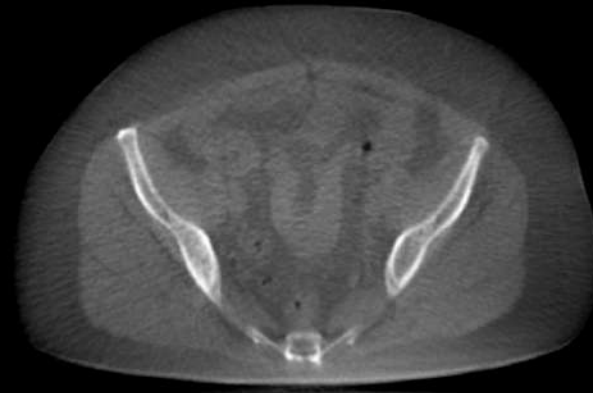

$T(y)=7.50$

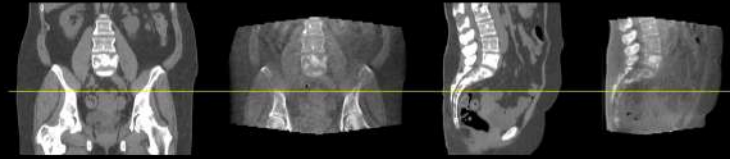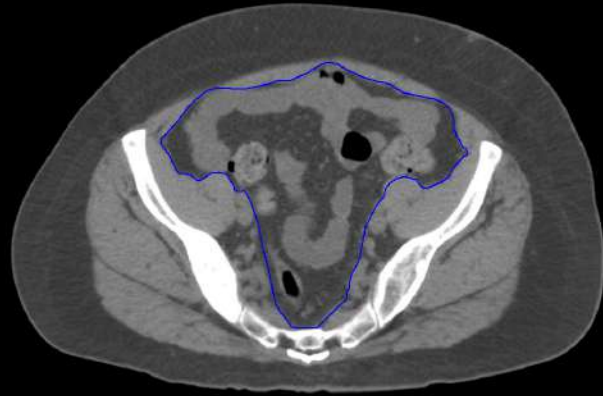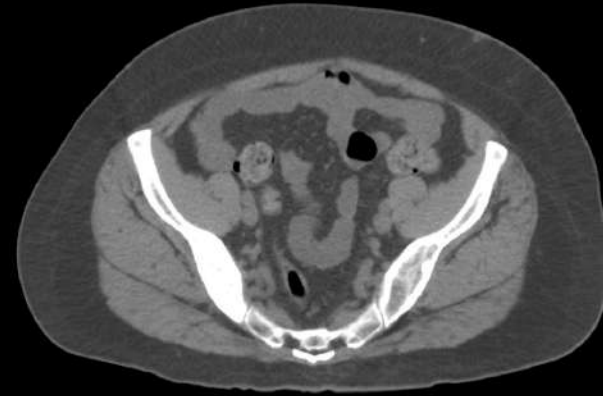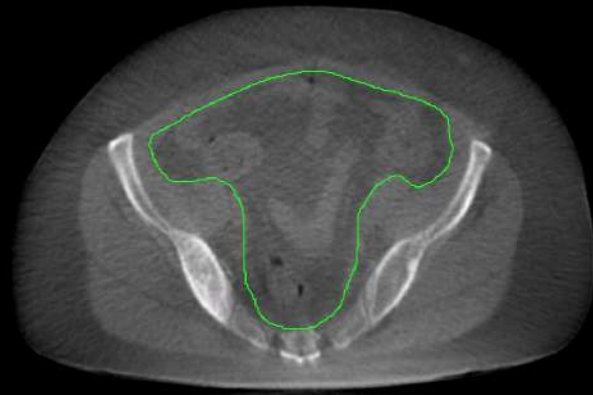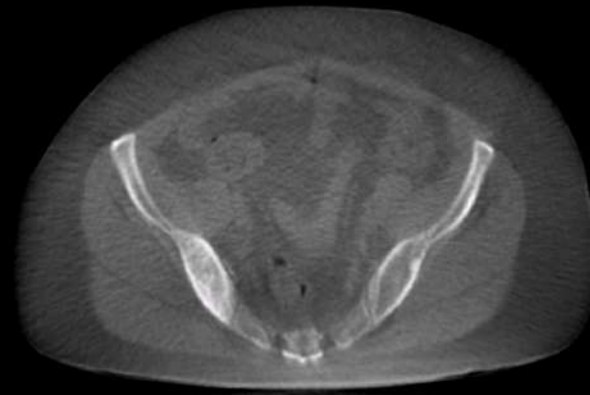

$T(y)=8.40$

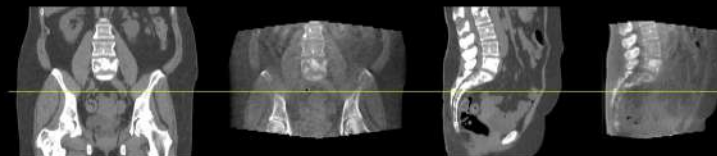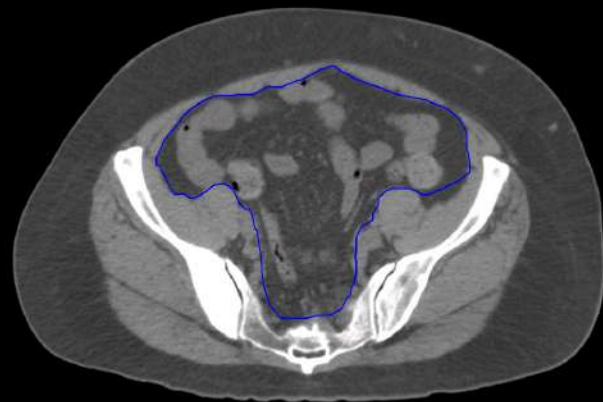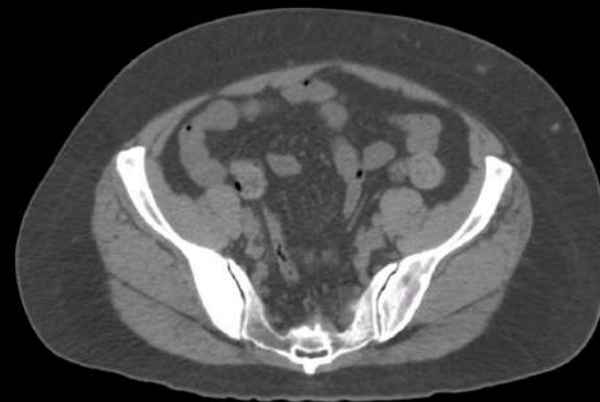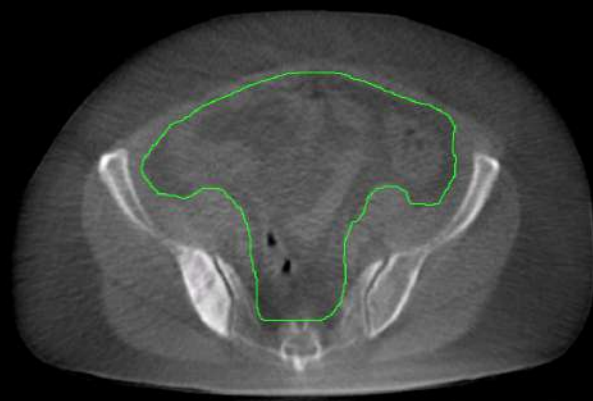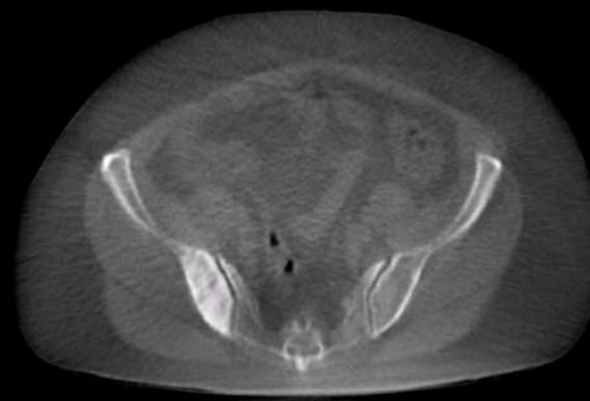

$T(y)=9.30$

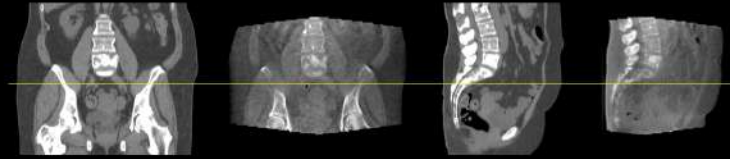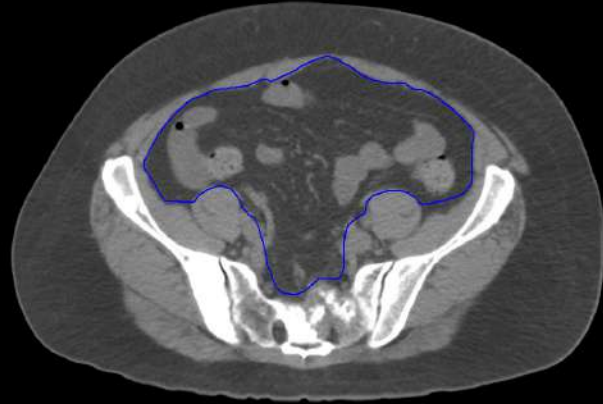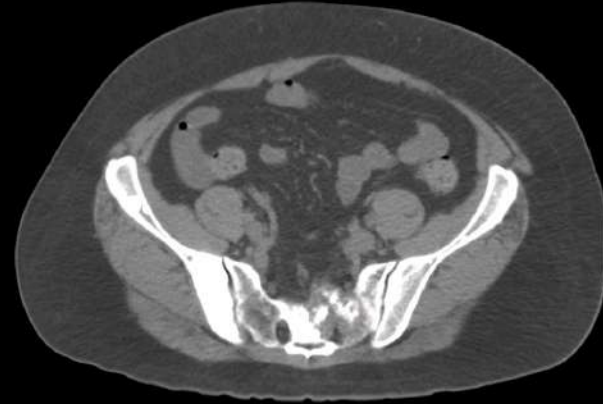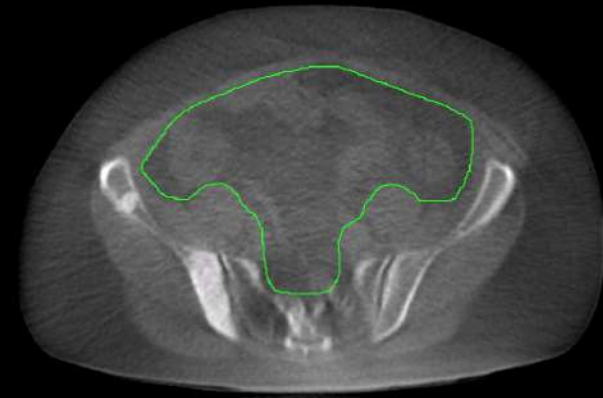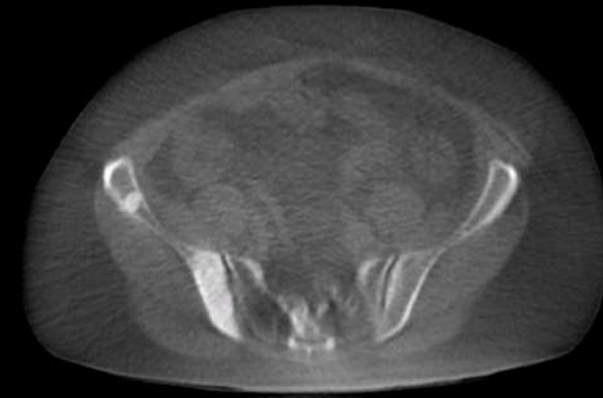

$T(y)=10.20$

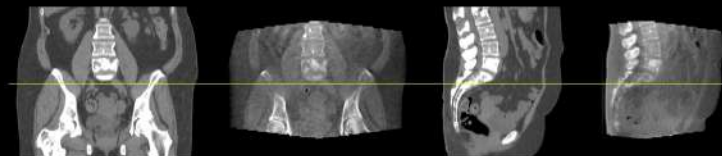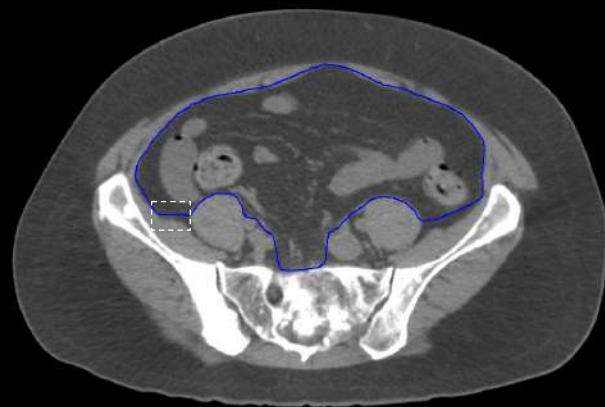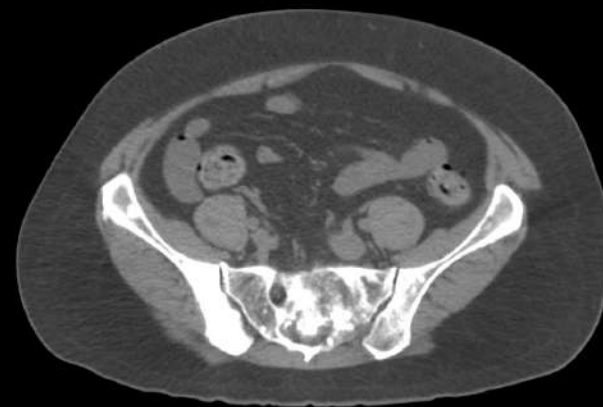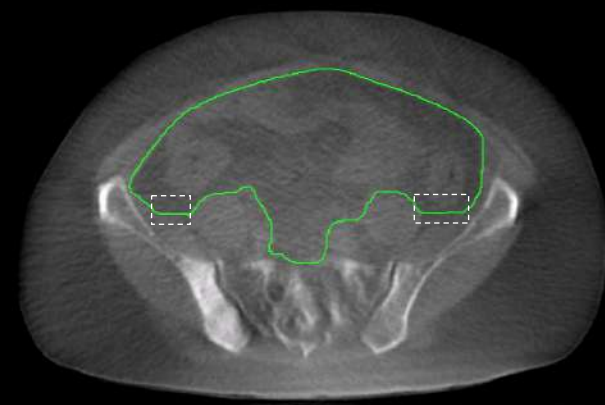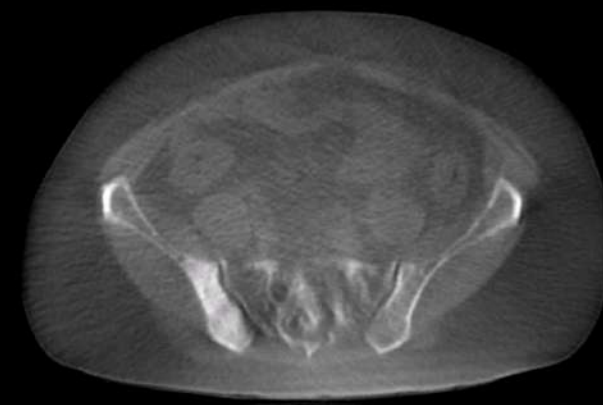



$T(y)=11.10$

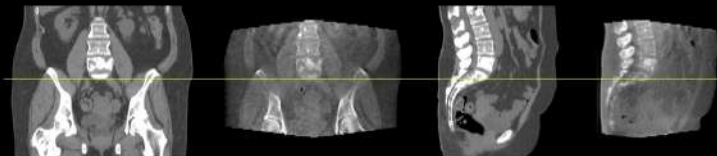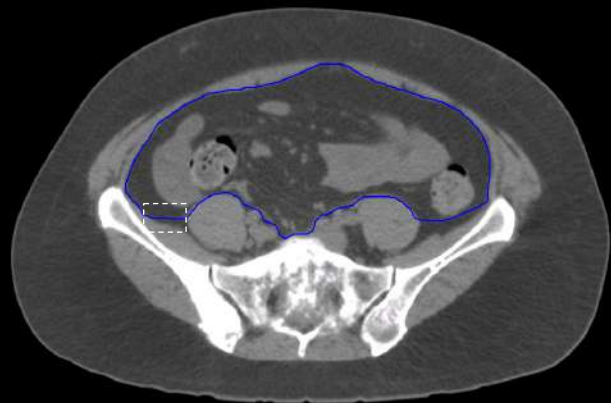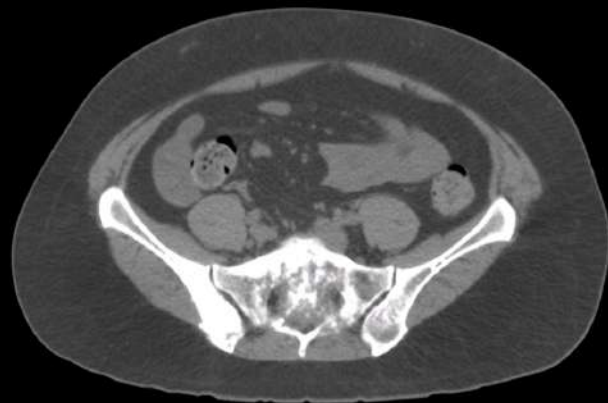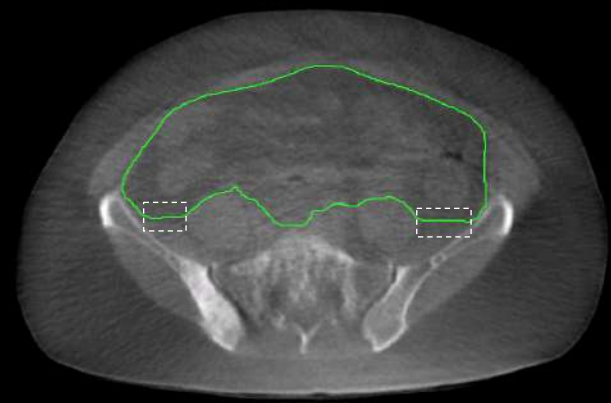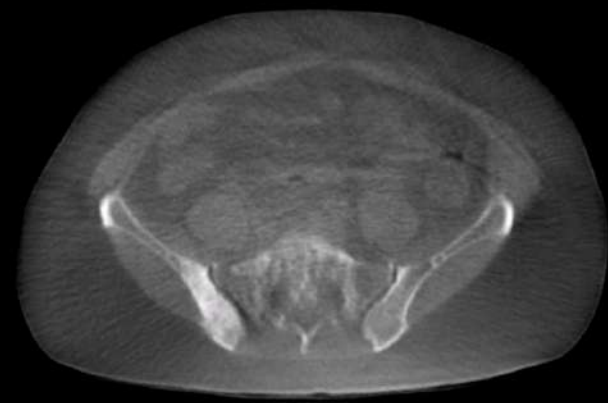



T(y)=12.00

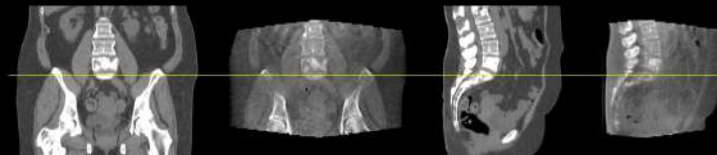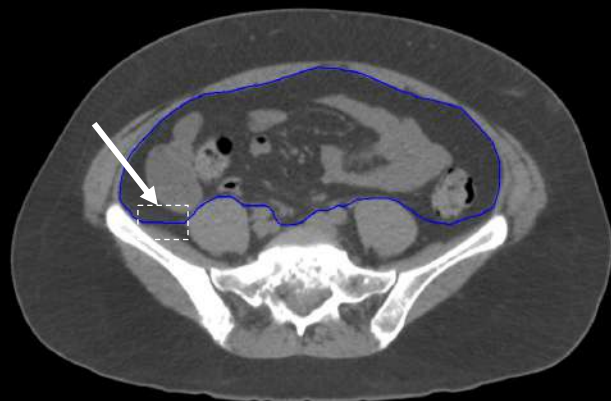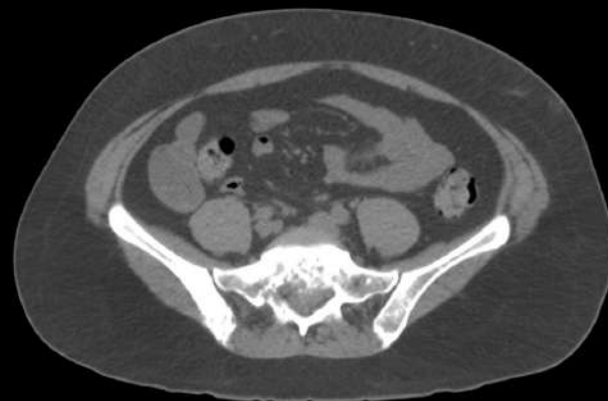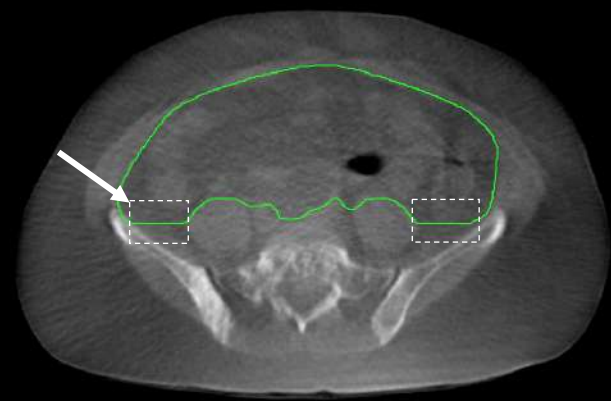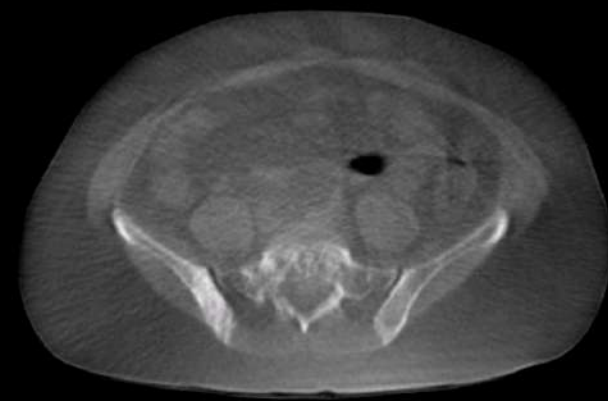

OD#1: lateral line from the lateral-most aspect of the psoas major to intersect the iliacus

$T(y)=12.90$

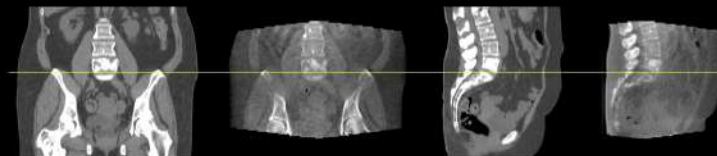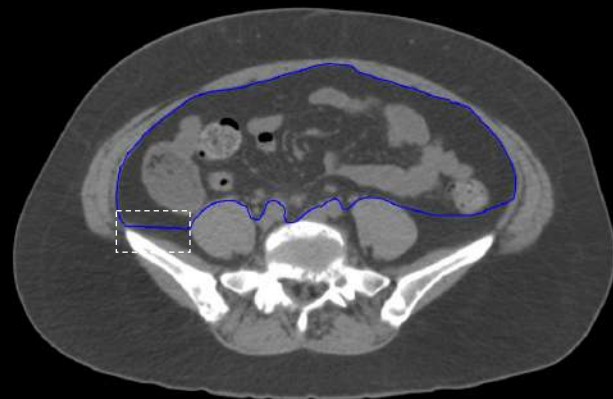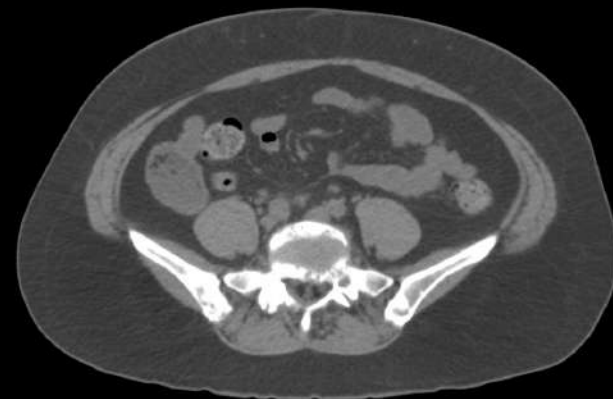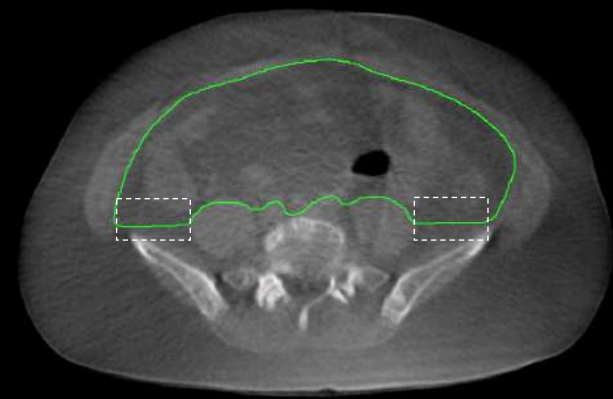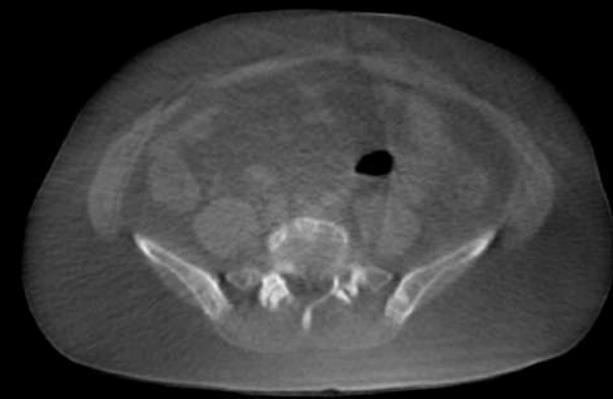

T(y)=13.80

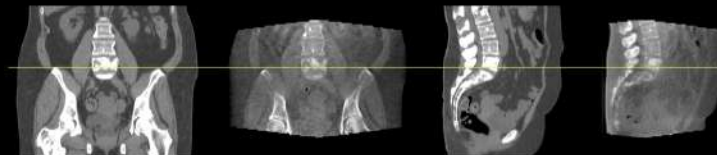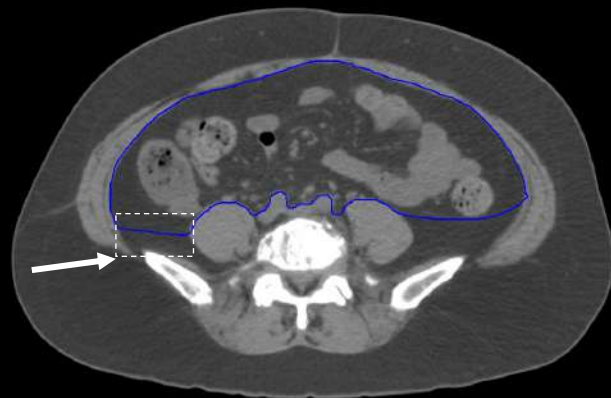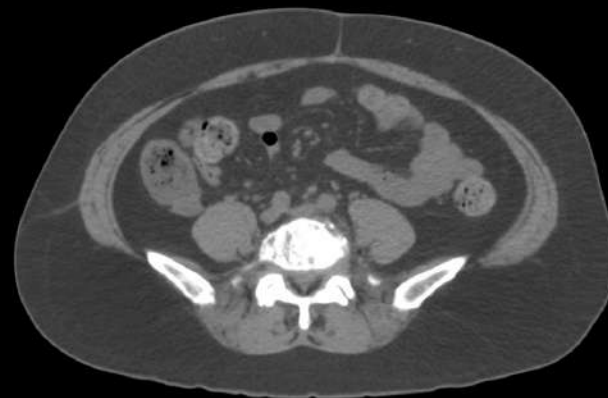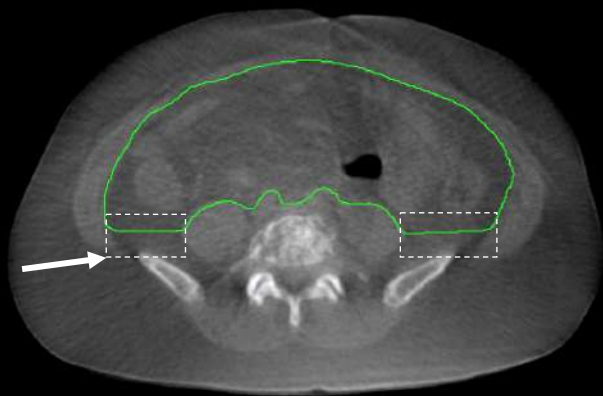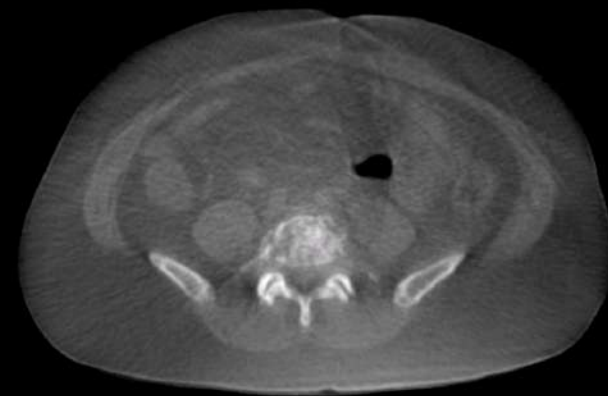

OD#1: lateral line from the lateral-most aspect of the psoas major to intersect the transverse abdominis

$T(y)=14.70$

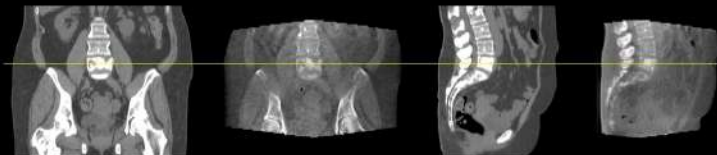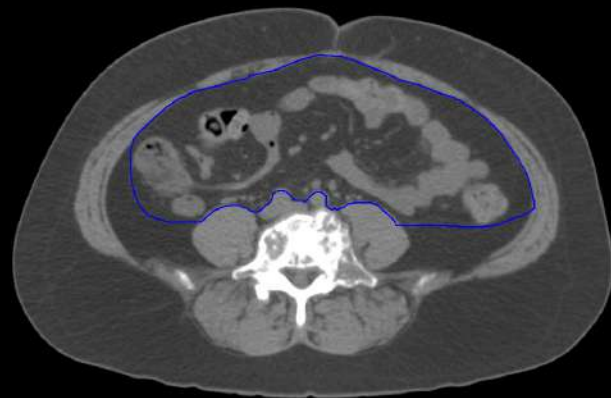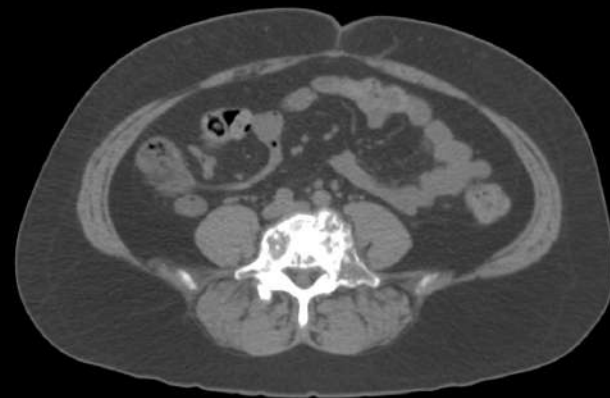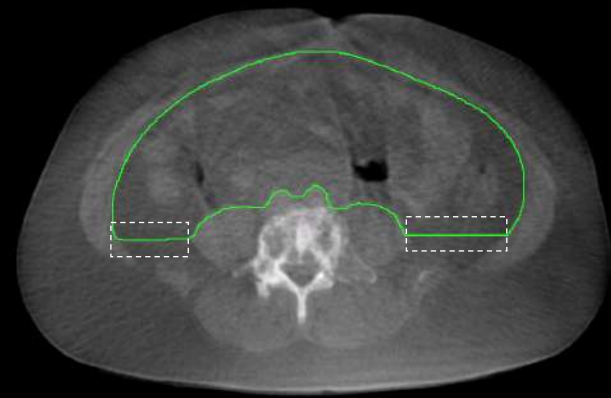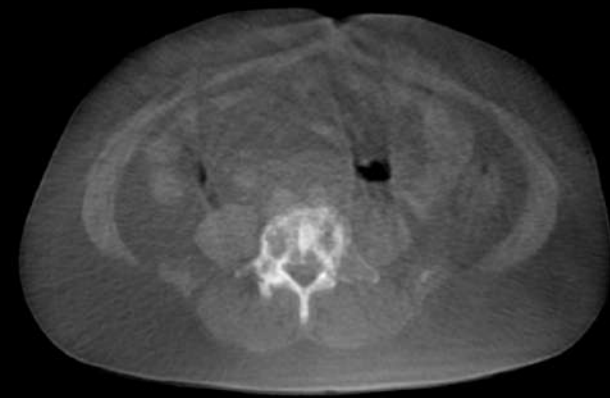

$T(y)=15.60$

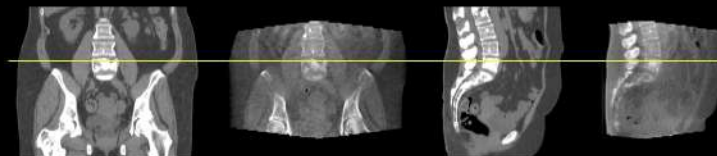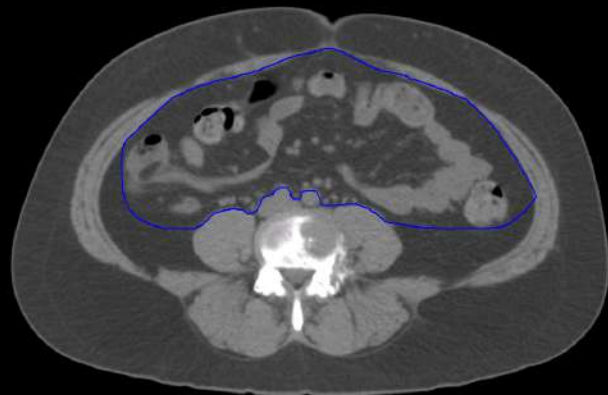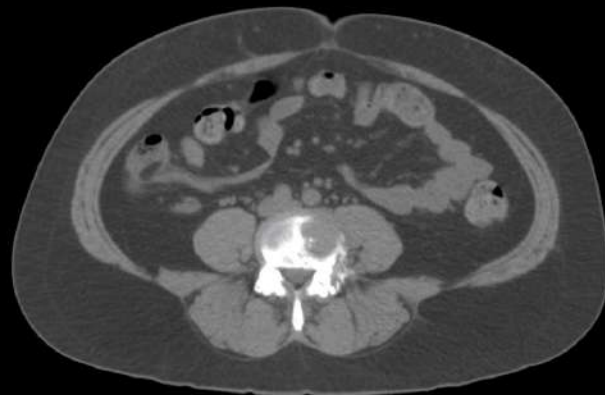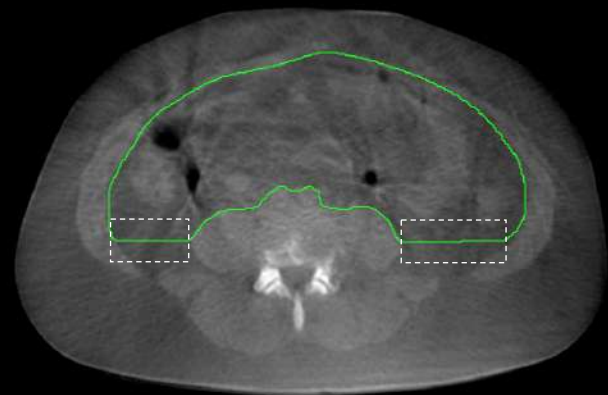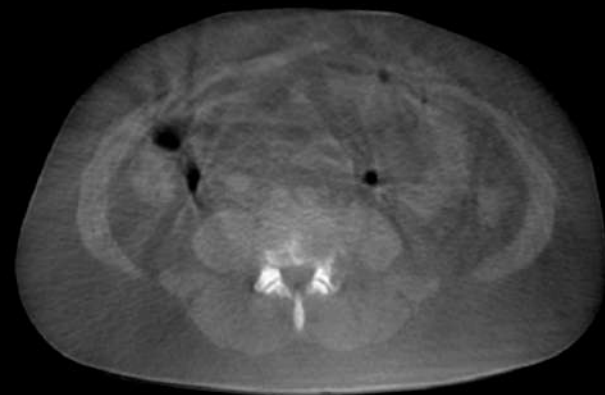



$T(y)=15.90$

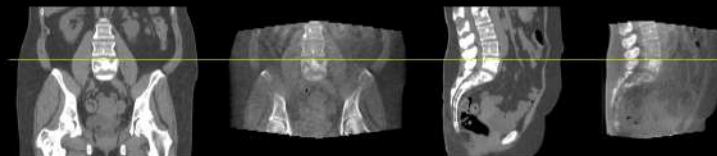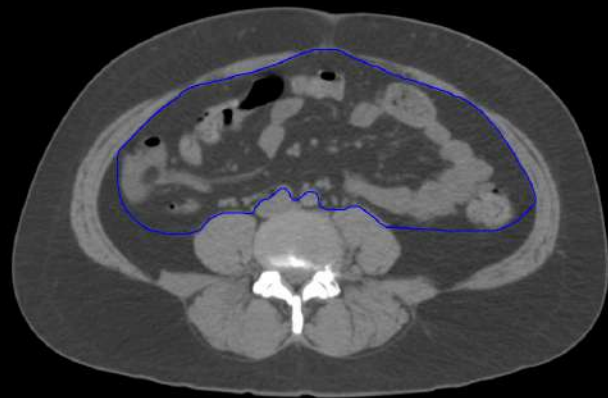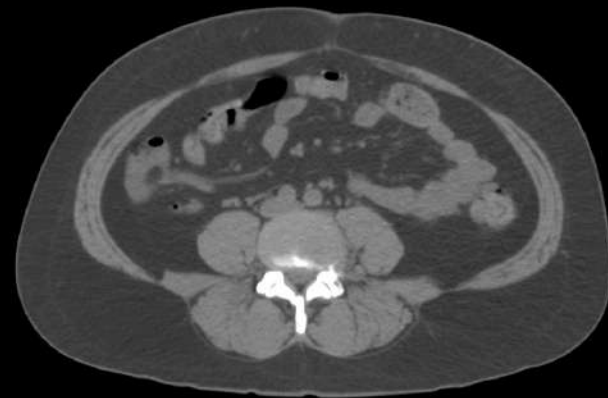

Supplement: mmc1.pdf [file mmc1.pdf]
